# Supplementary material for: Fast Solution-Phase and Liquid-Phase Peptide Syntheses (SolPSS and LPPS) Mediated by Biomimetic Cyclic Propylphosphonic Anhydride (T3P®)
Source: MDPI journal article supplement (doi:10.3390/molecules28207183), 2023-10-19
Supplement: s1 [file s1]

Archive with 1 entries (1 files):
- molecules-2663184-supplementary.pdf
