# Supplementary material for: Fast Solution-Phase and Liquid-Phase Peptide Syntheses (SolPSS and LPPS) Mediated by Biomimetic Cyclic Propylphosphonic Anhydride (T3P®)
Source: MDPI journal article supplement (doi:10.3390/molecules28207183), 2023-10-19
Supplement: s1 [file s1 › molecules-2663184-supplementary.pdf]

# Fast Solution-Phase and Liquid-Phase Peptide Syntheses (SolPPS and LPPS) Mediated by Biomimetic Cyclic Propylphosphonic Anhydride (T3P®)

Alexia Mattellone <sup>1</sup>, Dario Corbisiero <sup>1</sup>, Paolo Cantelmi <sup>1</sup>, Giulia Martelli <sup>1</sup>, Chiara Palladino <sup>1</sup>,  
Alessandra Tolomelli <sup>1,2,\*</sup>, Walter Cabri <sup>1,2,\*</sup> and Lucia Ferrazzano <sup>1</sup>

<sup>1</sup> Tolomelli-Cabri/P4I Lab—Peptidomimetics and Peptides Targeting Protein-Protein Interaction, Department of Chemistry “Giacomo Ciamician”, Alma Mater Studiorum—University of Bologna, Via Gobetti 87, 40129 Bologna, Italy; alexia.mattellone2@unibo.it (A.M.); dario.corbisiero2@unibo.it (D.C.); pa.cantelmi@gmail.com (P.C.); giulia.martelli8@unibo.it (G.M.); chiara.palladino5@unibo.it (C.P.); lucia.ferrazzano4@unibo.it (L.F.)

<sup>2</sup> Consorzio C.I.N.M.P.I.S. (National Interuniversity Research Consortium in Innovative Synthesis Methodologies and Processes) c/o, Alma Mater Studiorum—University of Bologna, Via Gobetti 87, 40129 Bologna, Italy

\* Correspondence: alessandra.tolomelli@unibo.it (A.T.); walter.cabri@unibo.it (W.C.); Tel.: +39-0512099575 (A.T.)

## Table of Contents

|                                                                                            |     |
|--------------------------------------------------------------------------------------------|-----|
| 1. HPLC Methods .....                                                                      | S2  |
| 2. HPLC Chromatogram: Solvent suitability .....                                            | S2  |
| 3. HPLC Chromatogram: Substrate scope .....                                                | S10 |
| 4. Racemization evaluation .....                                                           | S16 |
| 5. HPLC chromatogram: SolPPS of Leu-Enkephalin precursor <i>via N</i> -Boc chemistry ..... | S17 |
| 6. HPLC Chromatograms: Full LPPS of Leu-Enkephalin <i>via N</i> -Fmoc chemistry .....      | S22 |
| 6.1 Epimers of Leu-Enkephalin synthesized by SPPS .....                                    | S24 |
| 7. HPLC Chromatograms: Solvents and amino acids .....                                      | S25 |
| 8. NMR spectra .....                                                                       | S31 |

## 1. HPLC Methods

The gradient of analytical methods reported across the paper are defined as follow:

| Method A       |                    |                    |
|----------------|--------------------|--------------------|
| Flow: 1 ml/min |                    |                    |
| Time (min)     | Mobile phase A (%) | Mobile phase B (%) |
| 0              | 90                 | 10                 |
| 15             | 10                 | 90                 |
| 18             | 10                 | 90                 |
| 30             | 90                 | 10                 |

| Method B         |                    |                    |
|------------------|--------------------|--------------------|
| Flow: 0.5 ml/min |                    |                    |
| Time (min)       | Mobile phase A (%) | Mobile phase B (%) |
| 0                | 80                 | 20                 |
| 10               | 60                 | 40                 |
| 20               | 60                 | 40                 |
| 25               | 70                 | 30                 |
| 30               | 70                 | 30                 |

| Method C       |                    |                    |
|----------------|--------------------|--------------------|
| Flow: 1 ml/min |                    |                    |
| Time (min)     | Mobile phase A (%) | Mobile phase B (%) |
| 0              | 80                 | 20                 |
| 2              | 80                 | 20                 |
| 10             | 20                 | 80                 |
| 18             | 20                 | 80                 |
| 19             | 5                  | 95                 |
| 35             | 5                  | 95                 |
| 40             | 80                 | 20                 |
| 42             | 80                 | 20                 |

## 2. HPLC Chromatogram: Solvent suitability

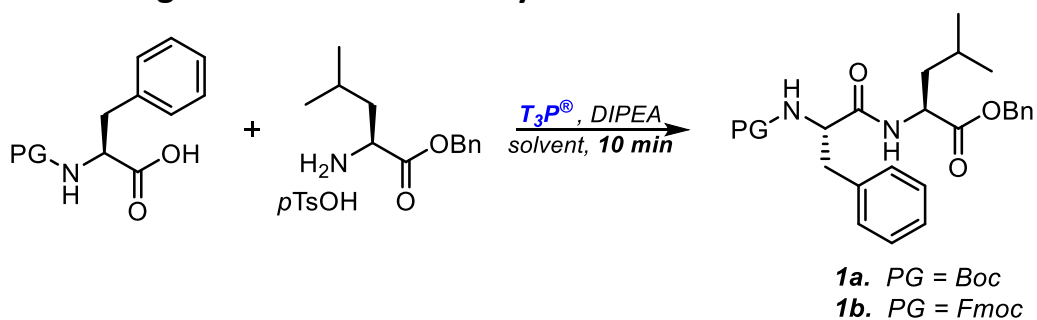

**Scheme S1.** Model reaction for T3P<sup>®</sup> induced peptide synthesis.

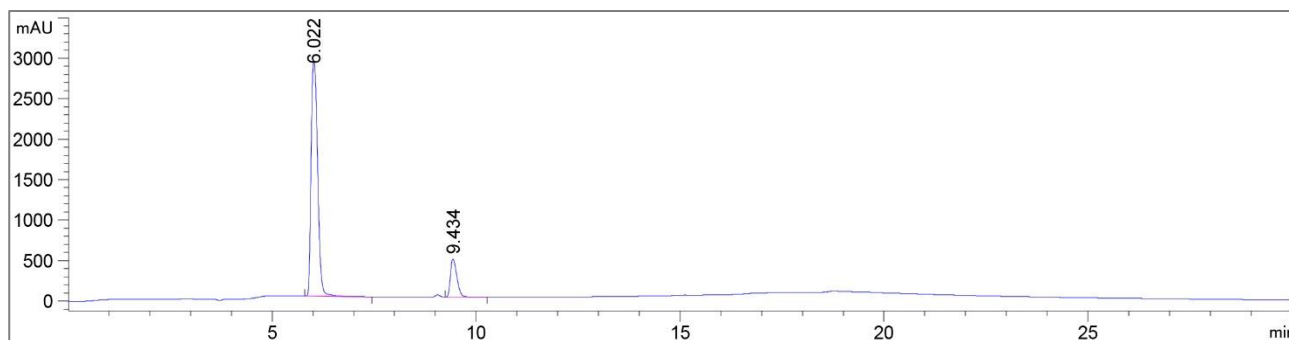

**Figure S1.** Chromatogram of  $\text{H}_2\text{N-Leu-OBn}$  at 220 nm (reference). The peak at 6.022 min is associated with *p*-Toluenesulphonic acid, as the counterion of the commercial leucine benzyl ester, and the peak at 9.434 min is related to  $\text{H}_2\text{N-Leu-OBn}$ .

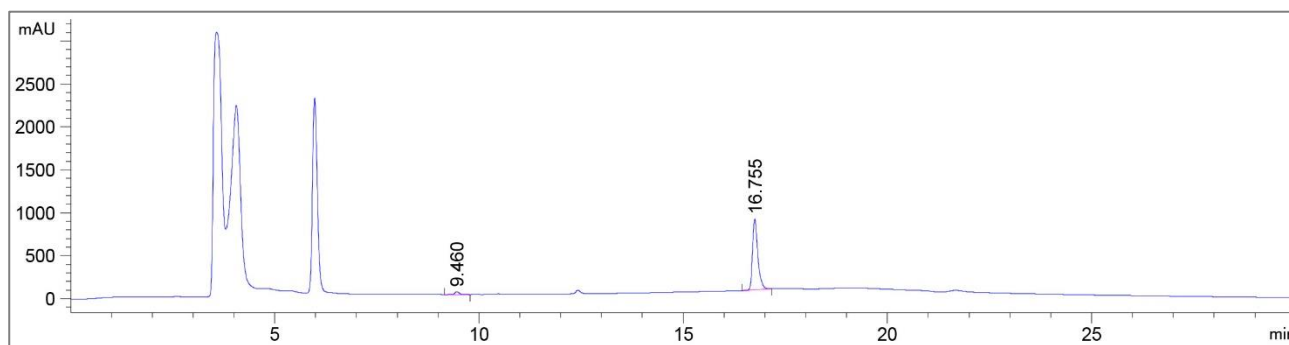

| Product                      | m/z observed | Rt (min) | Area (%) |
|------------------------------|--------------|----------|----------|
| <i>N</i> -Boc-Phe-Leu- OBn   | 469.0        | 16.755   | 96.8475  |
| $\text{H}_2\text{N-Leu-OBn}$ | 222.1        | 12.460   | 3.1525   |

**Figure S2.** Chromatogram of *N*-Boc-Phe-Leu-OBn (**1a**) in DMF at 220 nm (entry 1, Table 1 in the article). The peaks around 3 min are associated with DMF (see chapter 7).

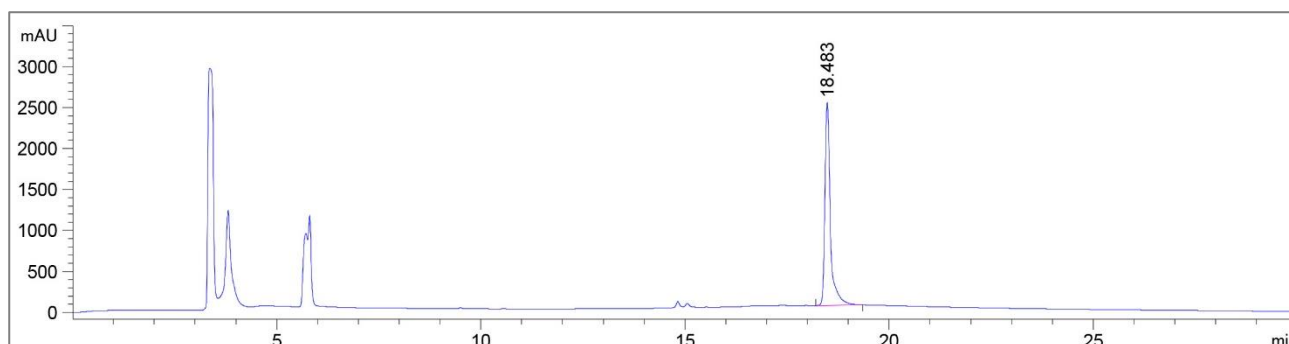

| Product                    | m/z observed | Rt (min) |
|----------------------------|--------------|----------|
| <i>N</i> -Fmoc-Phe-Leu-OBn | 591.3        | 18.483   |

**Figure S3.** Chromatogram of *N*-Fmoc-Phe-Leu-OBn (**1b**) in DMF at 220 nm (entry 2, Table 1 in the article). The peaks around 3 min are associated with DMF (see chapter 7).

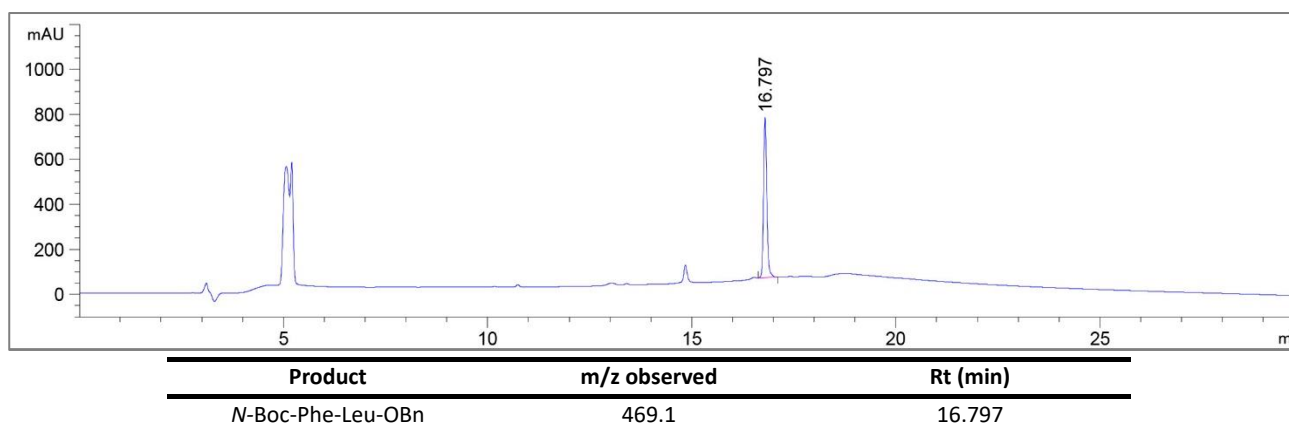

**Figure S4.** Chromatogram of *N*-Boc-Phe-Leu-OBn (**1a**) in DCM at 220 nm (entry 3, Table 1 in the article).

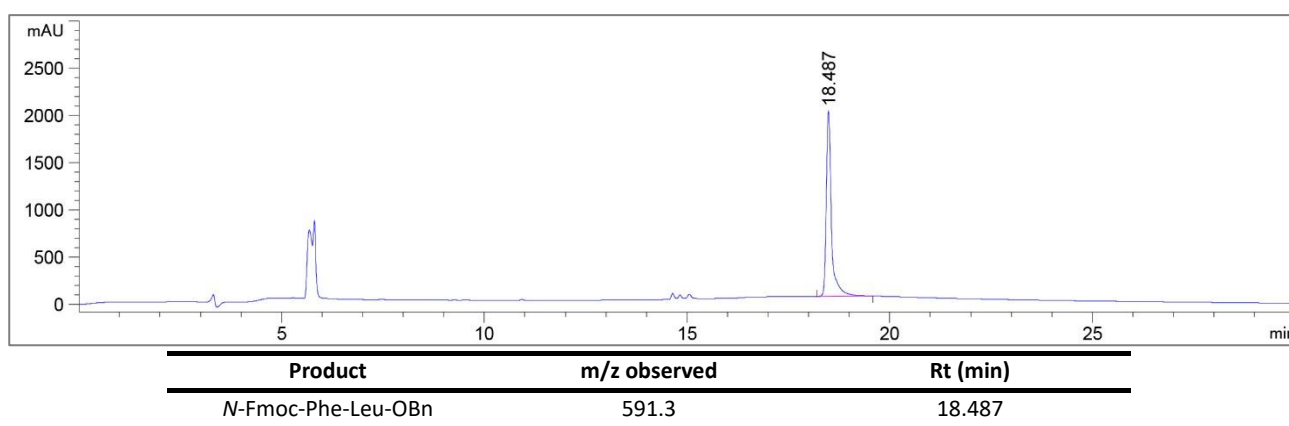

**Figure S5.** Chromatogram of *N*-Fmoc-Phe-Leu-OBn (**1b**) in DCM at 220 nm (entry 4, Table 1 in the article).

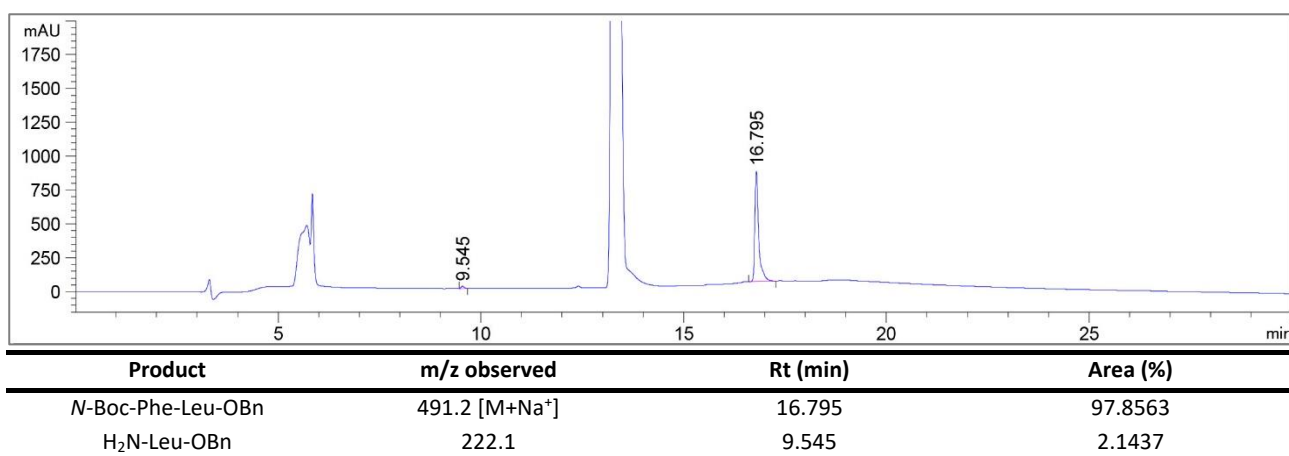

**Figure S6.** Chromatogram of *N*-Boc-Phe-Leu-OBn (**1a**) in Anisole at 220 nm (entry 5, Table 1 in the article). The peak at 13 min is associated with Anisole (see chapter 7).

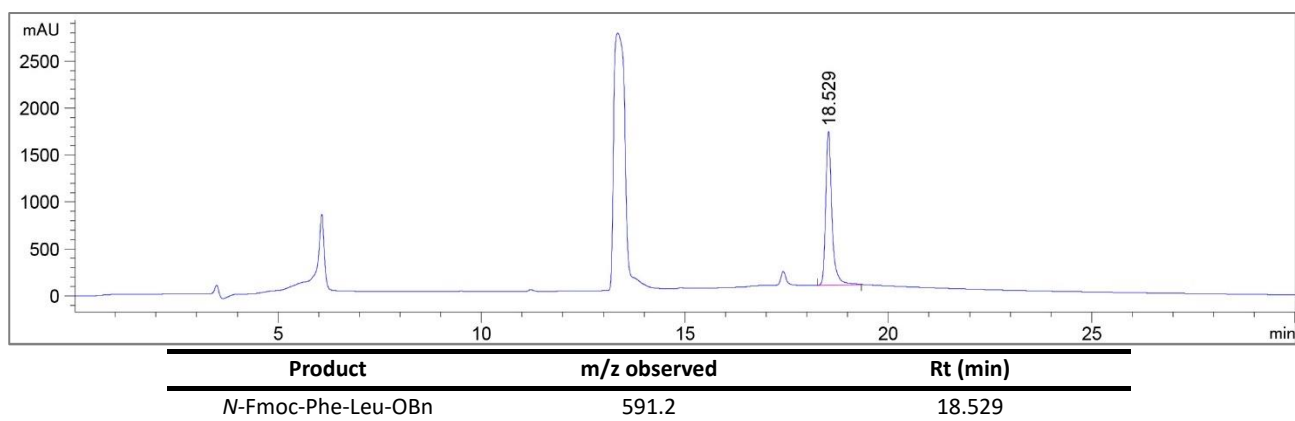

**Figure S7.** Chromatogram of *N*-Fmoc-Phe-Leu-OBn (**1b**) in Anisole at 220 nm (entry 6, Table 1 in the article). The peak at 13 min is associated with Anisole (see chapter 7).

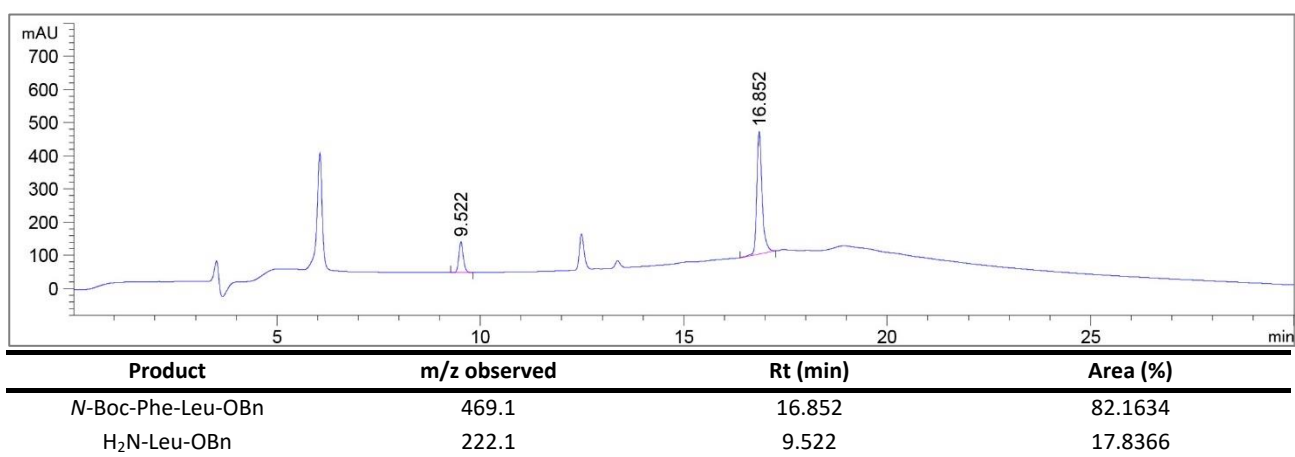

**Figure S8.** Chromatogram of *N*-Boc-Phe-Leu-OBn (**1a**) in CPME at 220 nm (entry 7, Table 1 in the article).

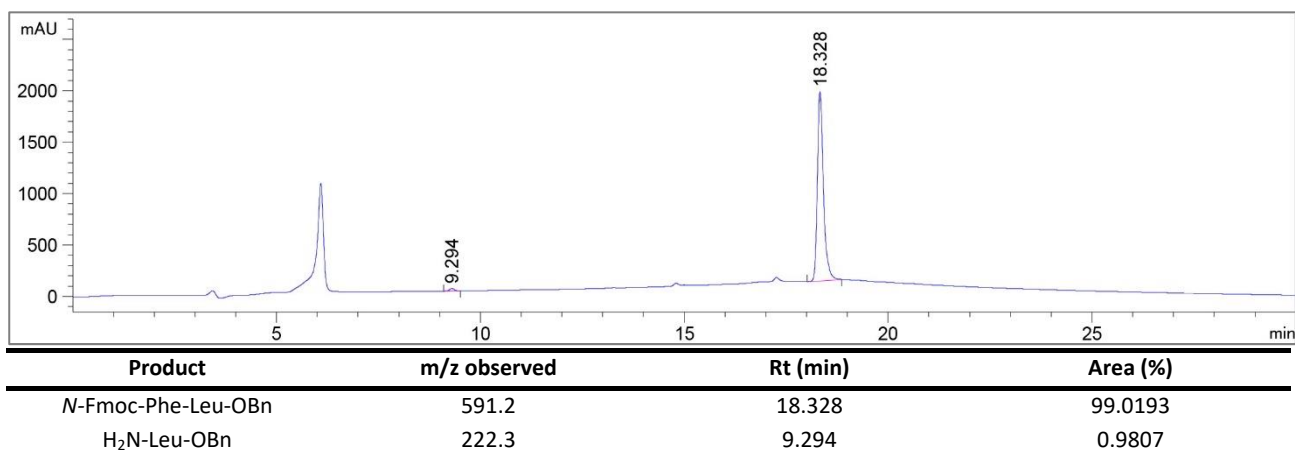

**Figure S9.** Chromatogram of *N*-Fmoc-Phe-Leu-OBn (**1b**) in CPME at 220 nm (entry 8, Table 1 in the article).

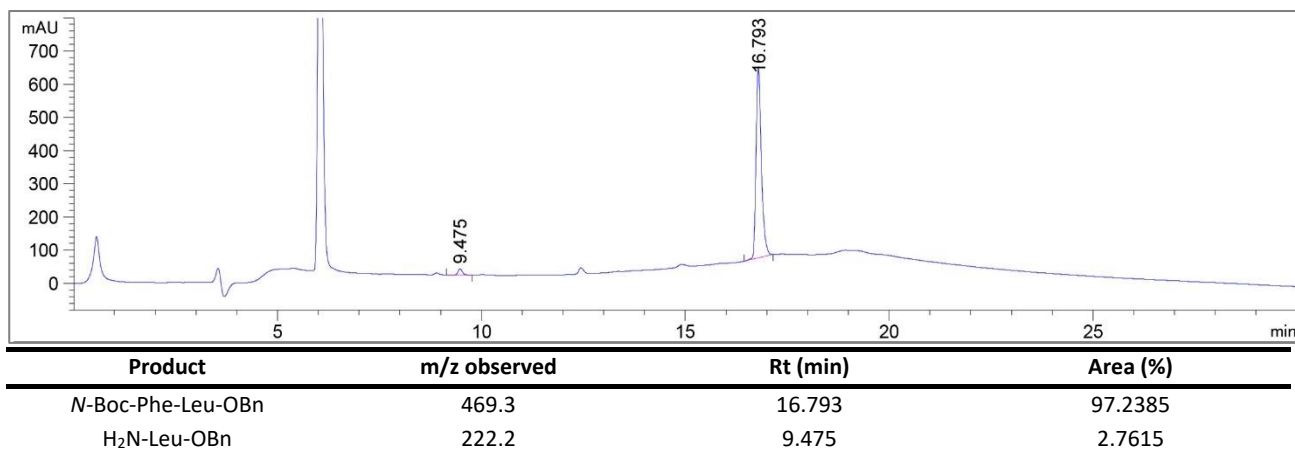

**Figure S10.** Chromatogram of *N*-Boc-Phe-Leu-OBn (**1a**) in EtOAc at 220 nm (entry 9, Table 1 in the article).

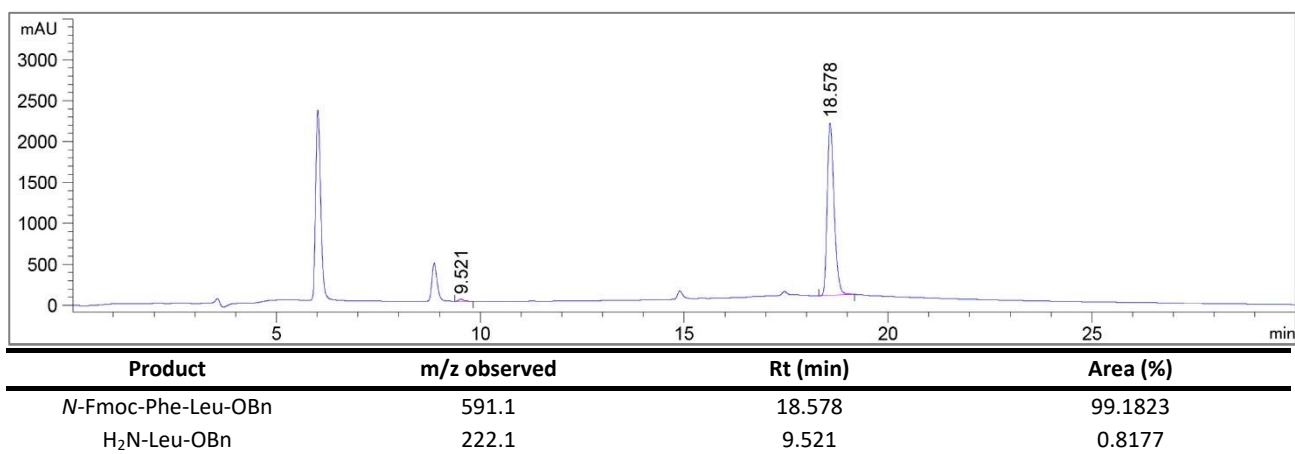

**Figure S11.** Chromatogram of *N*-Fmoc-Phe-Leu-OBn (**1b**) in EtOAc at 220 nm (entry 10, Table 1 in the article). The peak at 8 min is associated with EtOAc (see chapter 7).

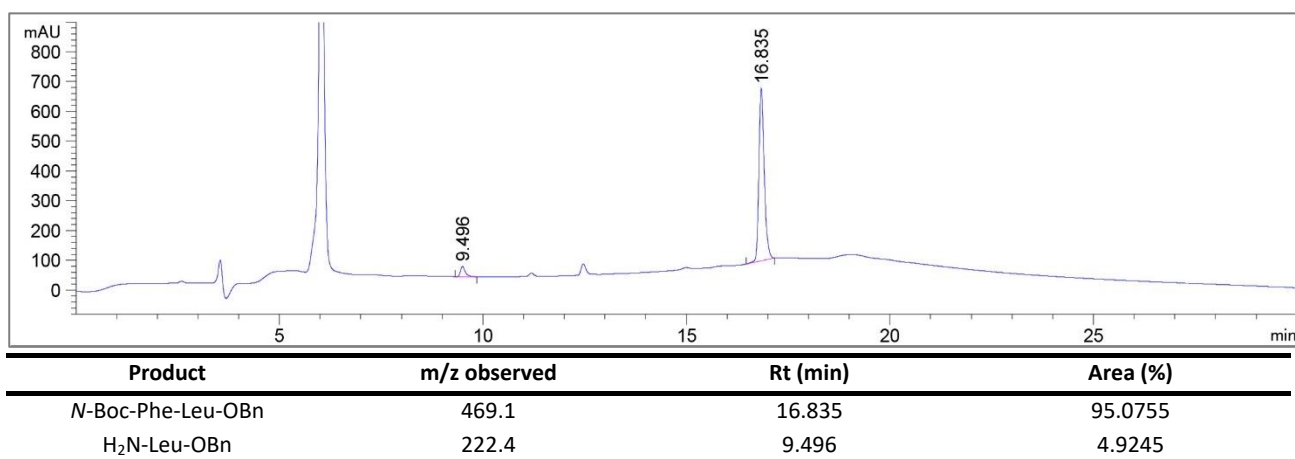

**Figure S12.** Chromatogram of *N*-Boc-Phe-Leu-OBn (**1a**) in PrOAc at 220 nm (entry 11, Table 1 in the article).

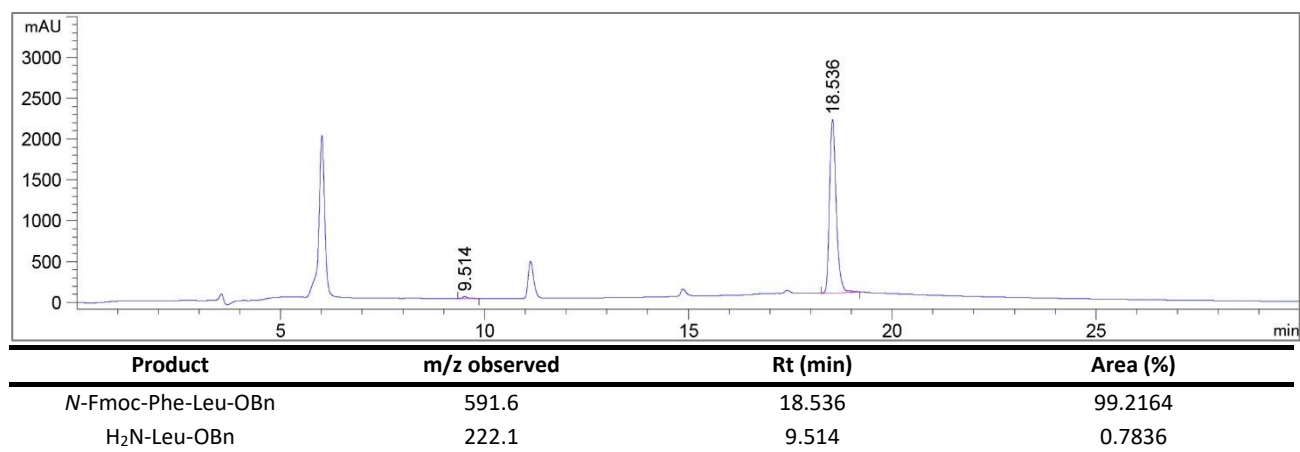

**Figure S13.** Chromatogram of *N*-Fmoc-Phe-Leu-OBn (**1b**) in PrOAc at 220 nm (entry 12, Table 1 in the article). The peak at 11 min is associated with PrOAc (see chapter 7).

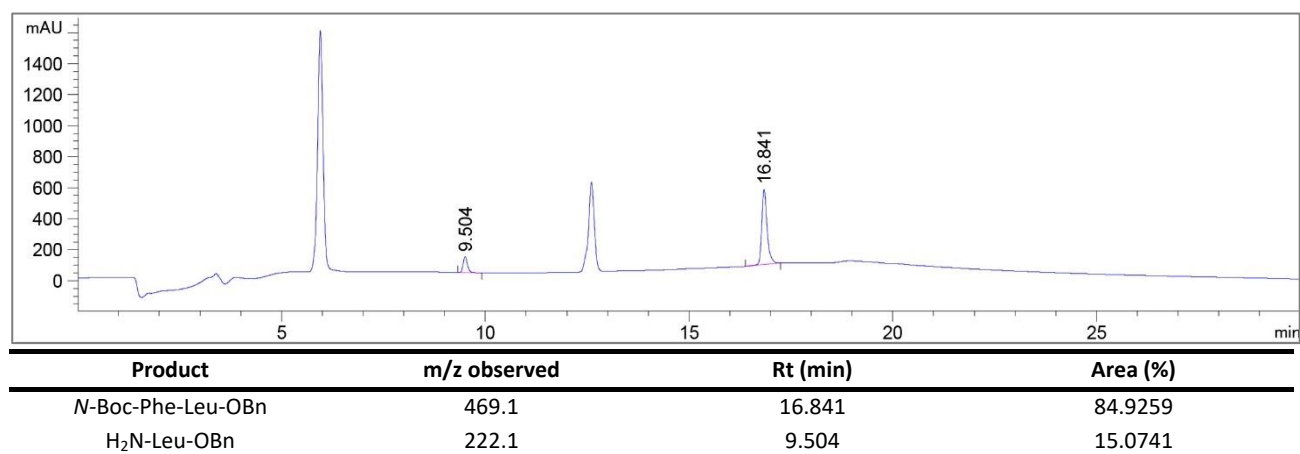

**Figure S14.** Chromatogram of *N*-Boc-Phe-Leu-OBn (**1a**) in tBuOAc at 220 nm (entry 13, Table 1 in the article). The peak at 12 min is associated with tBuOAc (see chapter 7).

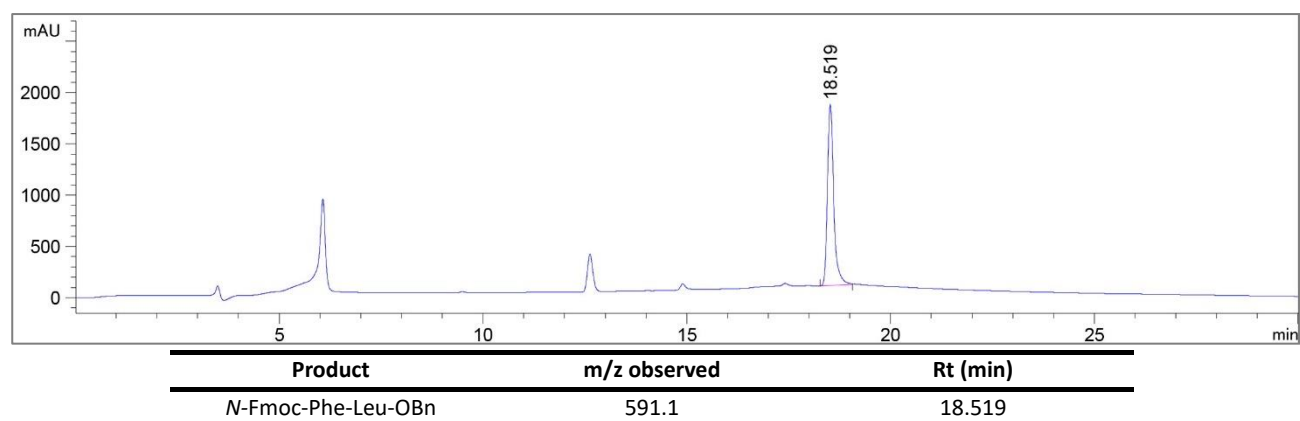

**Figure S15.** Chromatogram of *N*-Fmoc-Phe-Leu-OBn (**1b**) in tBuOAc at 220 nm (entry 14, Table 1 in the article). The peak at 12 min is associated with tBuOAc (see chapter 7).

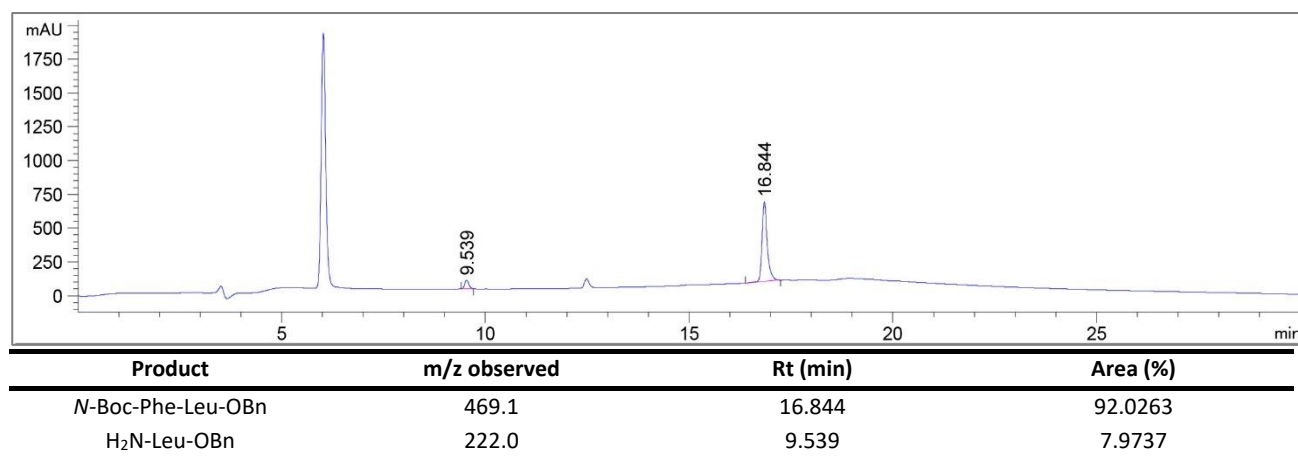

**Figure S16.** Chromatogram of *N*-Boc-Phe-Leu-OBn (**1a**) in DMC at 220 nm (entry 15, Table 1 in the article).

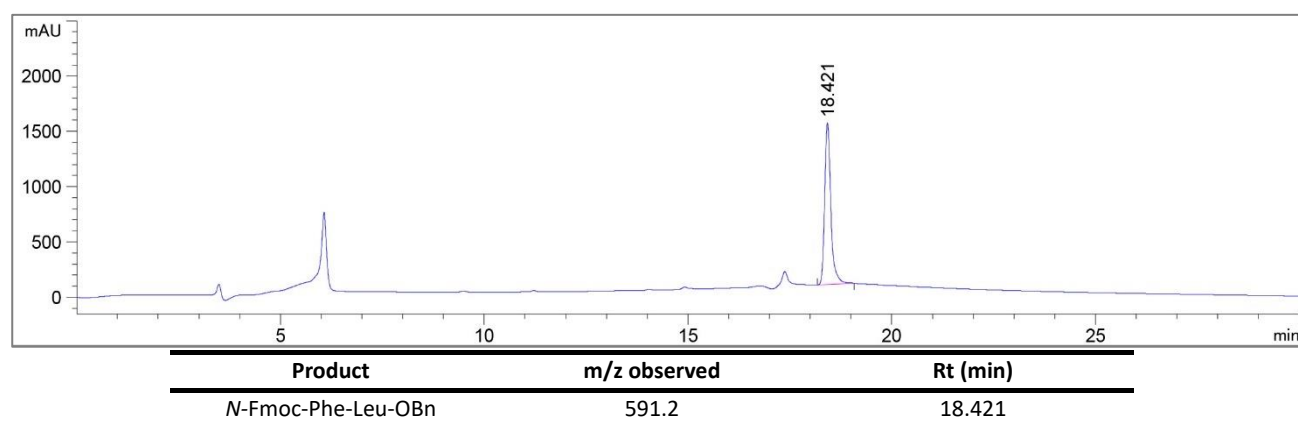

**Figure S17.** Chromatogram of *N*-Fmoc-Phe-Leu-OBn (**1b**) in DMC at 220 nm (entry 16, Table 1 in the article).

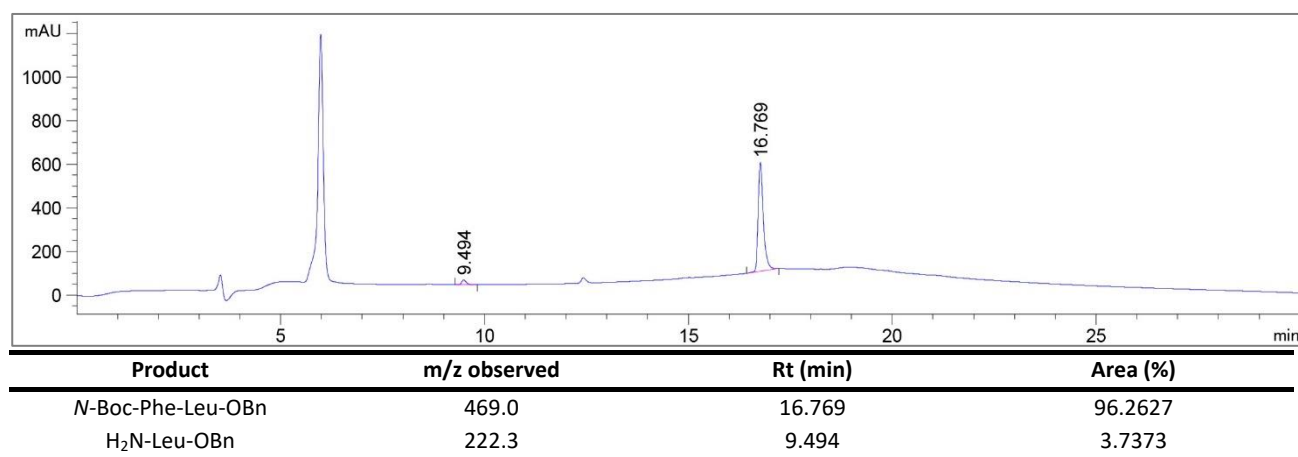

**Figure S18.** Chromatogram of *N*-Boc-Phe-Leu-OBn (**1a**) in THF at 220 nm (entry 17, Table 1 in the article).

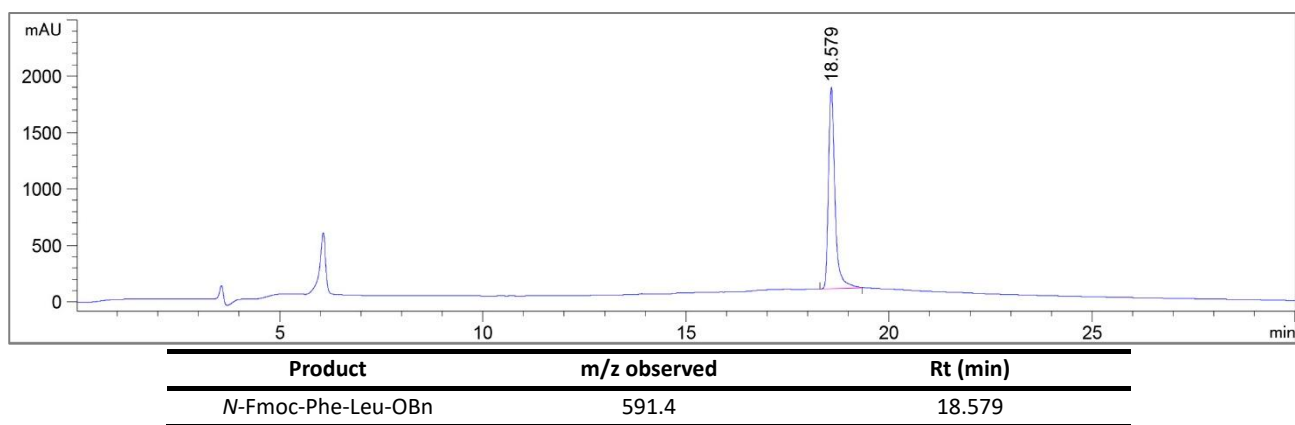

**Figure S19.** Chromatogram of *N*-Fmoc-Phe-Leu-OBn (**1b**) in THF at 220 nm (entry 18, Table 1 in the article).

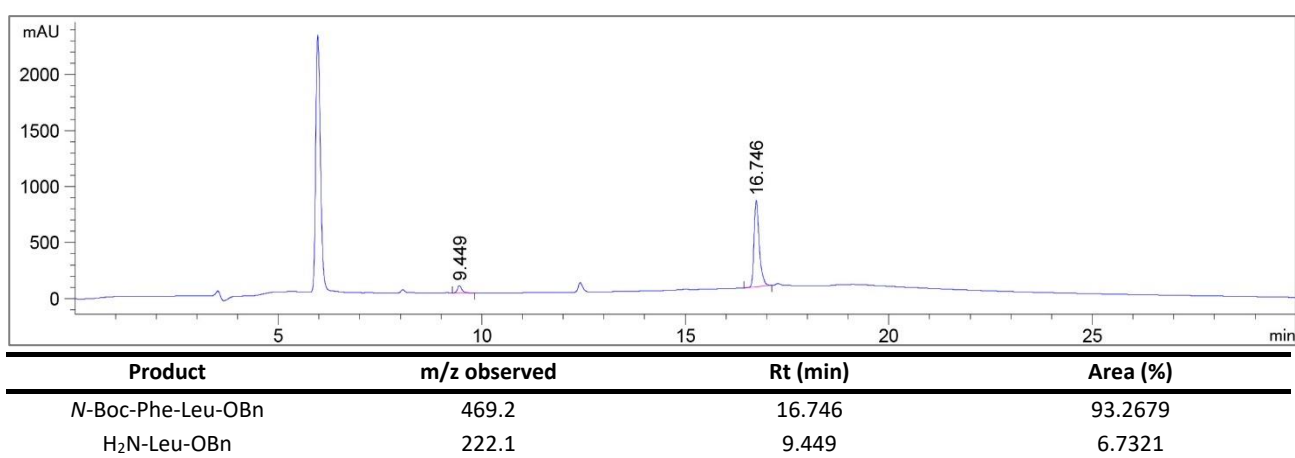

**Figure S20.** Chromatogram of *N*-Boc-Phe-Leu-OBn (**1a**) in ACN at 220 nm (entry 19, Table 1 in the article).

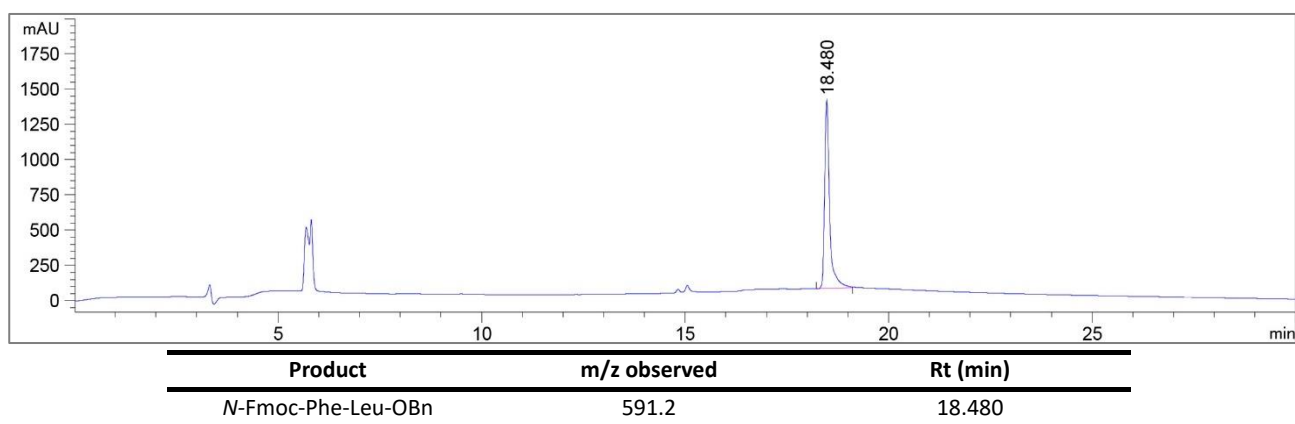

**Figure S21.** Chromatogram of *N*-Fmoc-Phe-Leu-OBn (**1b**) in ACN at 220 nm (entry 20, Table 1 in the article).

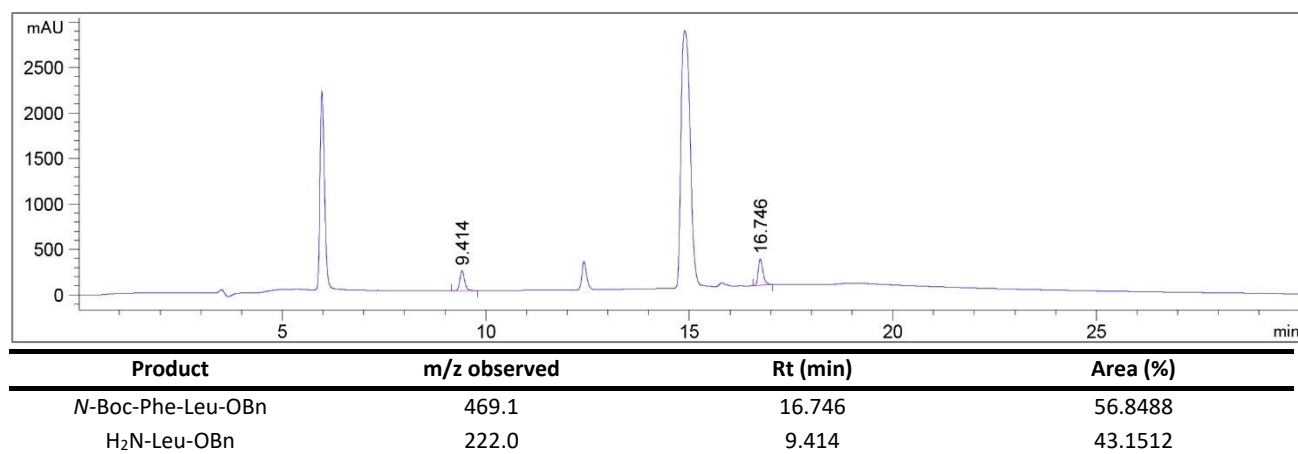

**Figure S22.** Chromatogram of *N*-Boc-Phe-Leu-OBn (**1a**) in NOP at 220 nm (entry 21, Table 1 in the article). The peak at 15 min is associated with NOP (see chapter 7).

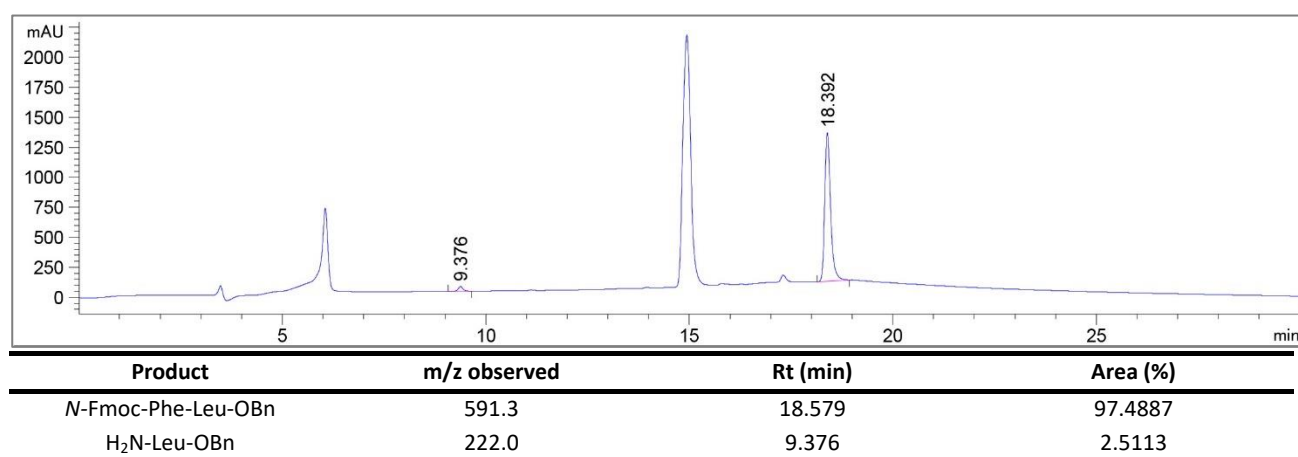

**Figure S23.** Chromatogram of *N*-Fmoc-Phe-Leu-OBn (**1b**) in NOP at 220 nm (entry 22, Table 1 in the article). The peak at 15 min is associated with NOP (see chapter 7).

### 3. HPLC Chromatogram: Substrate scope

#### Chromatograms

The PG-amino acids were injected into the HPLC-MS with the same methods used for each reaction. In addition, for the reaction of 12, 13 and 14 entries (Table S2) samples were analyzed using a different method (Method C) due to elution difficulties.

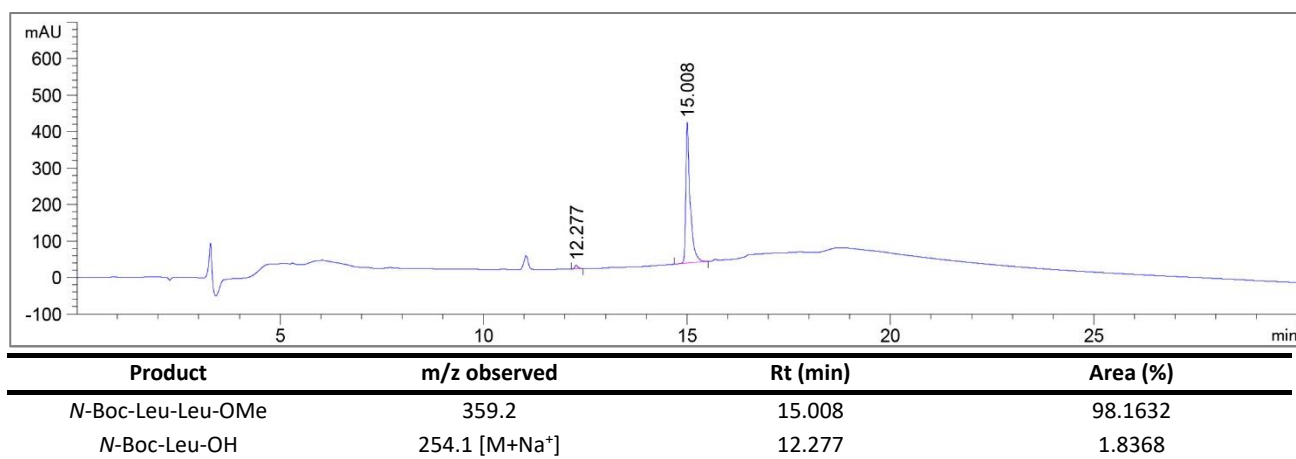

**Figure S24.** Chromatogram of *N*-Boc-Leu-Leu-OMe in DCM at 220 nm (entry 1, Table 2 in the article).

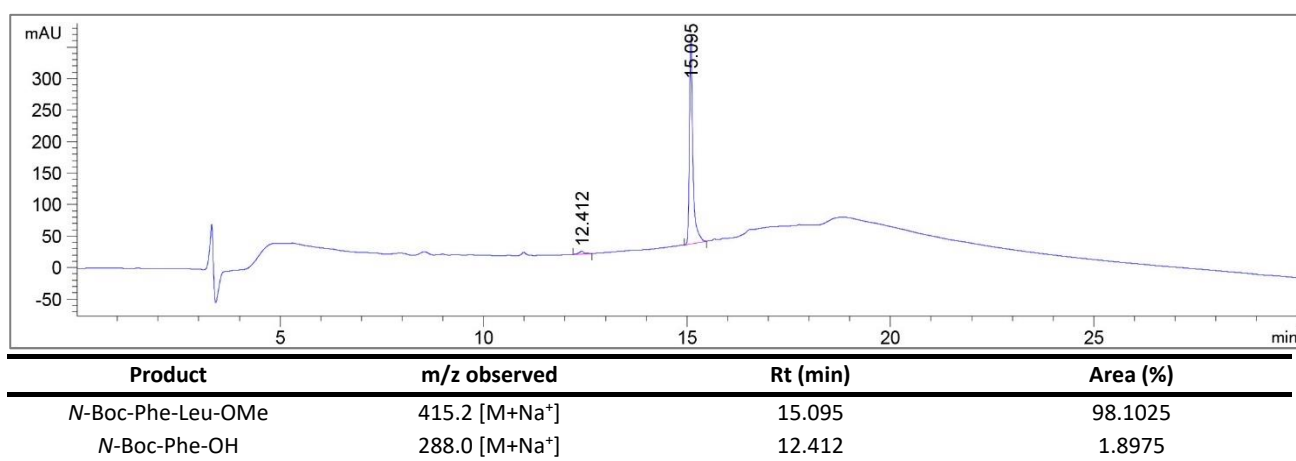

**Figure S25.** Chromatogram of *N*-Boc-Phe-Leu-OMe in DCM at 220 nm (entry 2, Table 2 in the article).

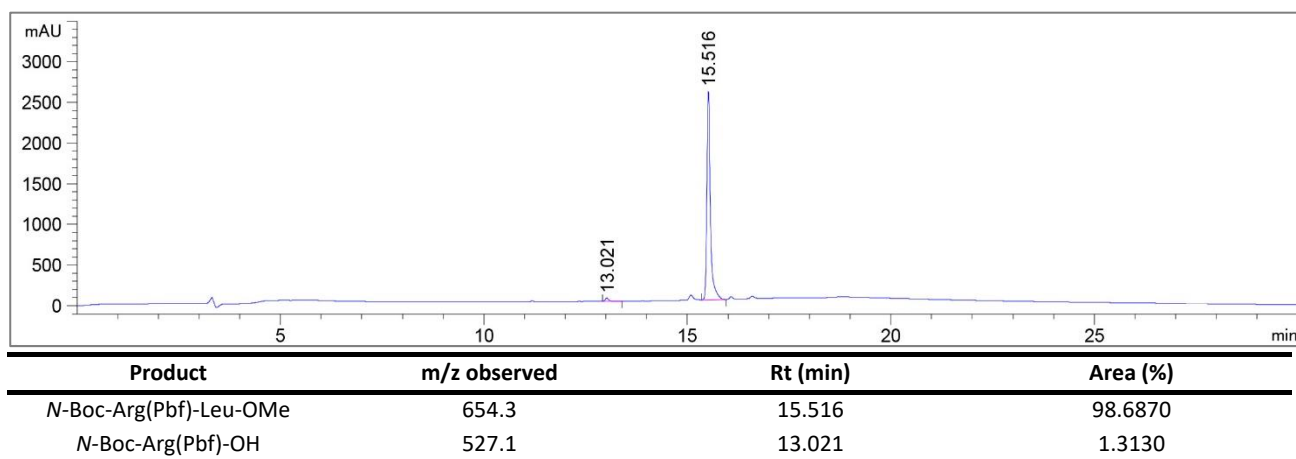

**Figure S26.** Chromatogram of *N*-Boc-Arg(Pbf)-Leu-OMe in DCM at 220 nm (entry 3, Table 2 in the article).

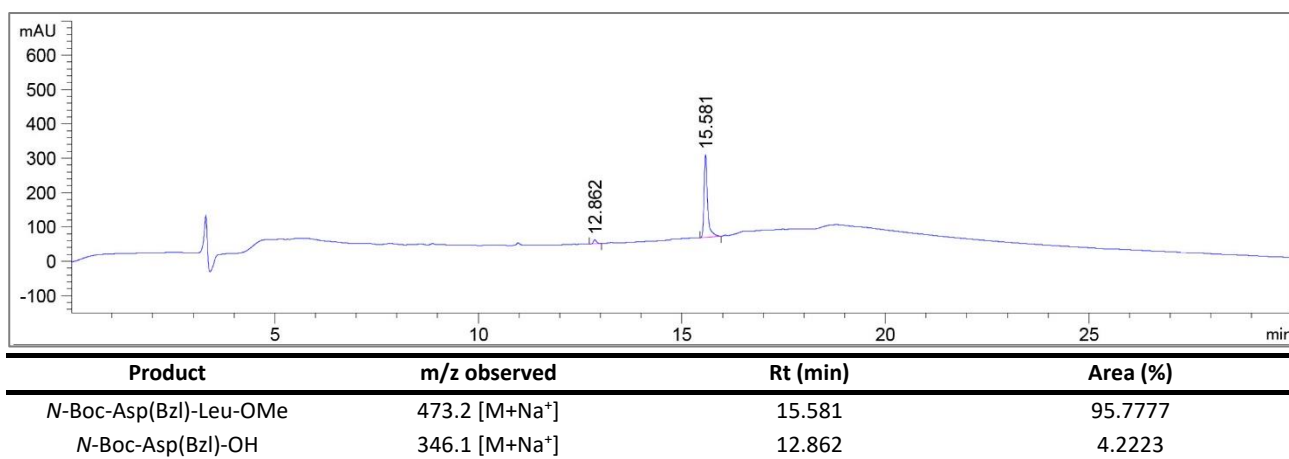

**Figure S27.** Chromatogram of *N*-Boc-Asp(Bzl)-Leu-OMe in DCM at 220 nm (entry 4, Table 2 in the article).

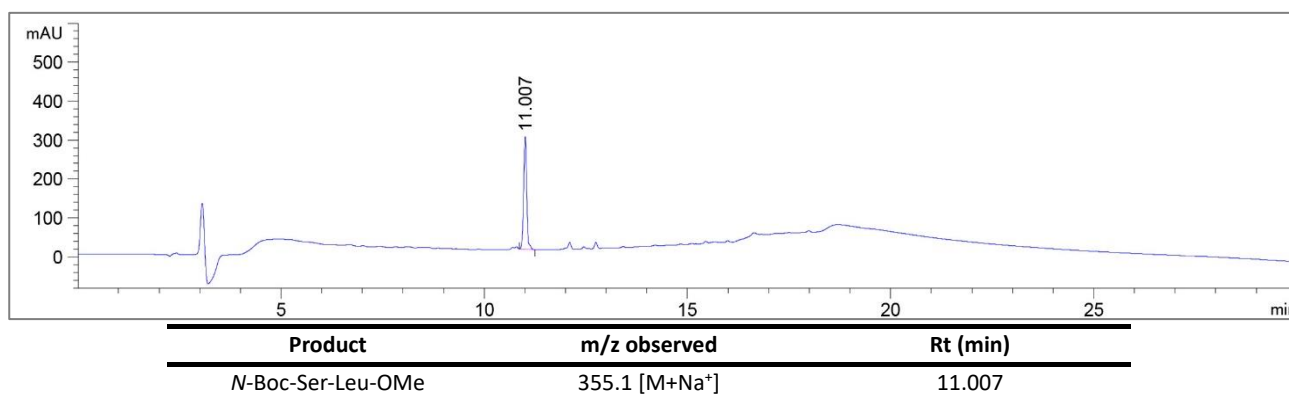

**Figure S28.** Chromatogram of *N*-Boc-Ser-Leu-OMe in DCM at 220 nm (entry 5, Table 2 in the article).

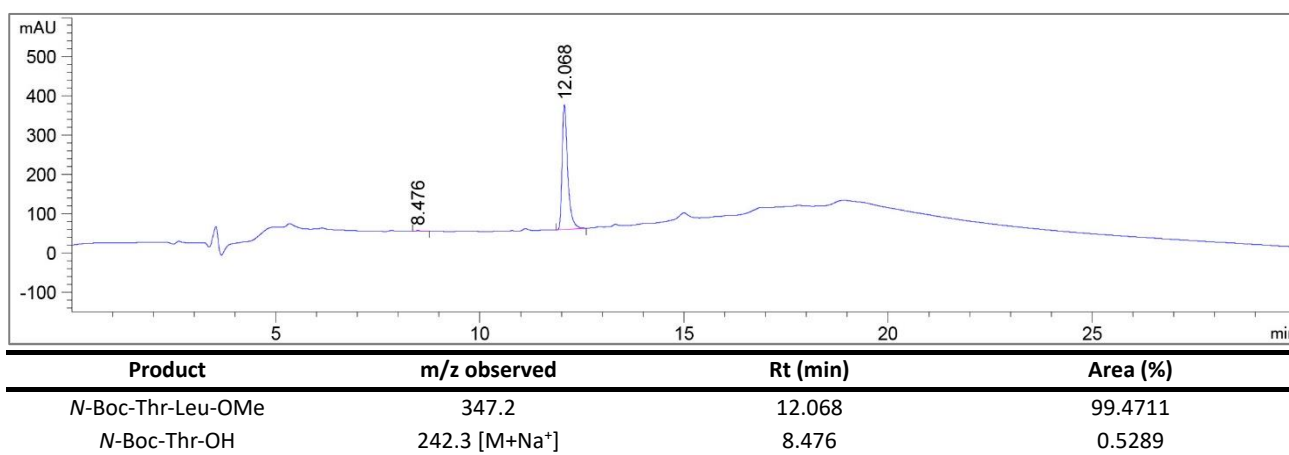

**Figure S29.** Chromatogram of *N*-Boc-Thr-Leu-OMe in DCM at 220 nm (entry 6, Table 2 in the article).

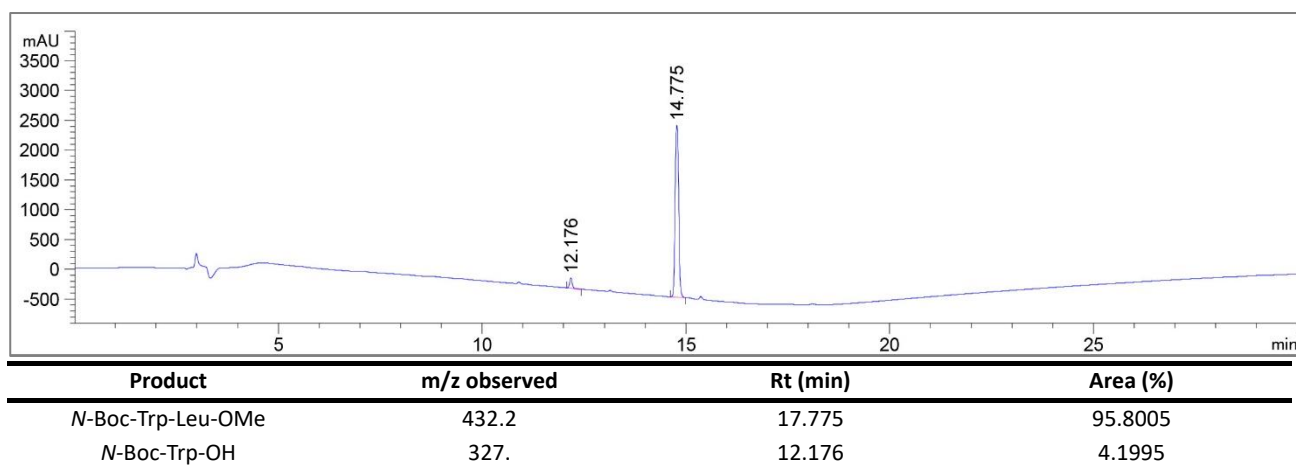

**Figure S30.** Chromatogram of *N*-Boc-Trp-Leu-OMe in DCM at 220 nm (entry 7, Table 2 in the article).

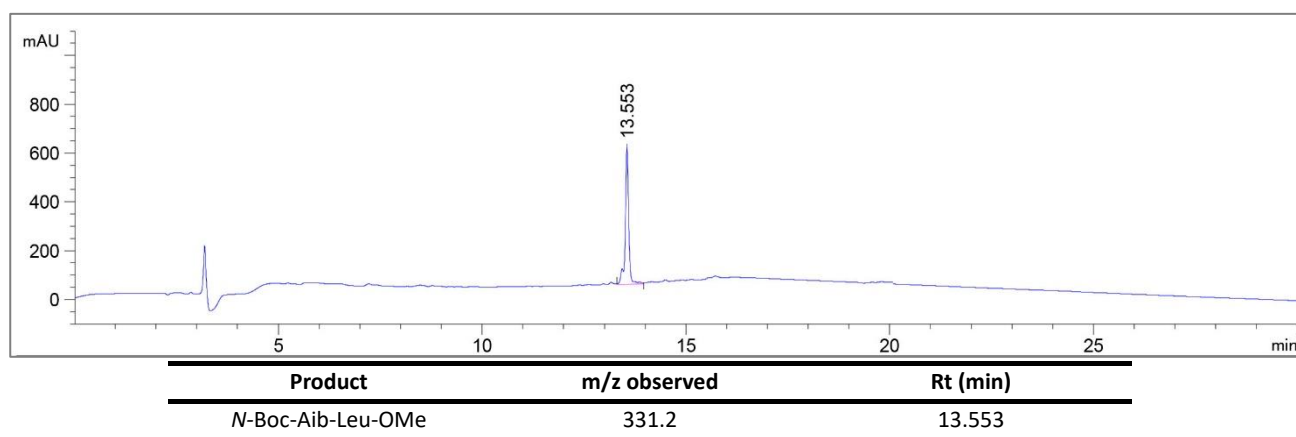

**Figure S31.** Chromatogram of *N*-Boc-Aib-Leu-OMe in DCM at 220 nm (entry 8, Table 2 in the article).

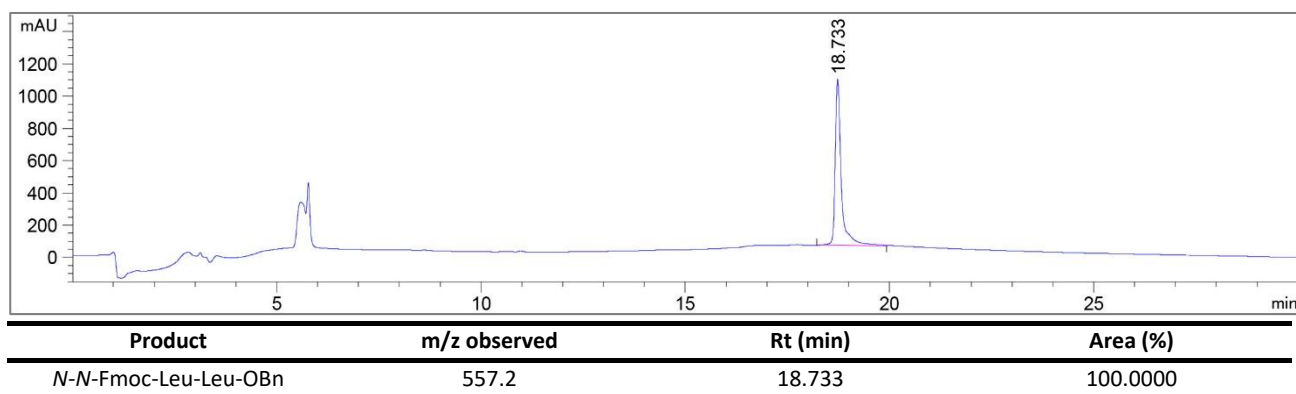

**Figure S32.** Chromatogram of *N*-*N*-Fmoc-Leu-Leu-OBn in DCM at 220 nm (entry 9, Table 2 in the article).

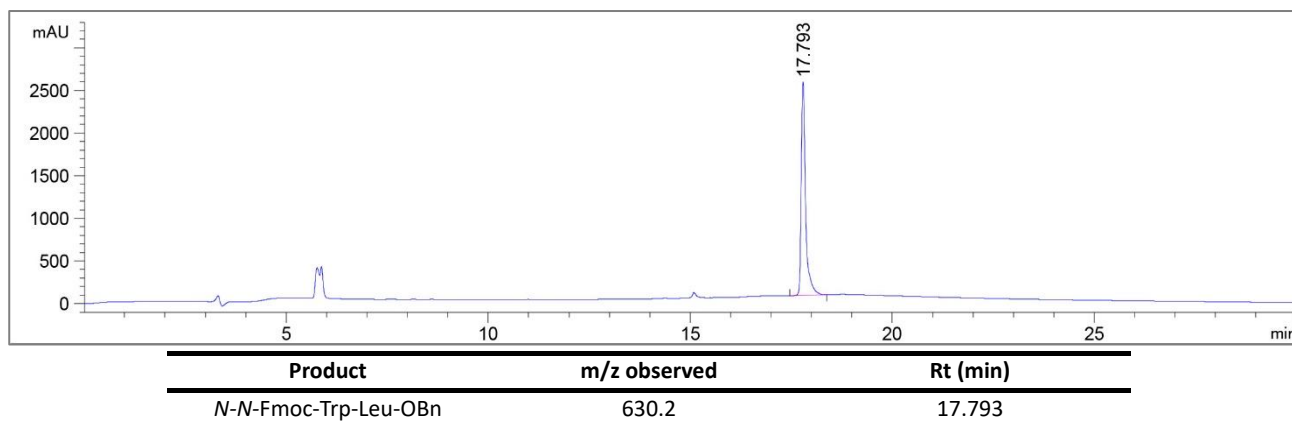

**Figure S33.** Chromatogram of *N*-Fmoc-Trp-Leu-OBn in DCM at 220 nm (entry 10, Table 2 in the article).

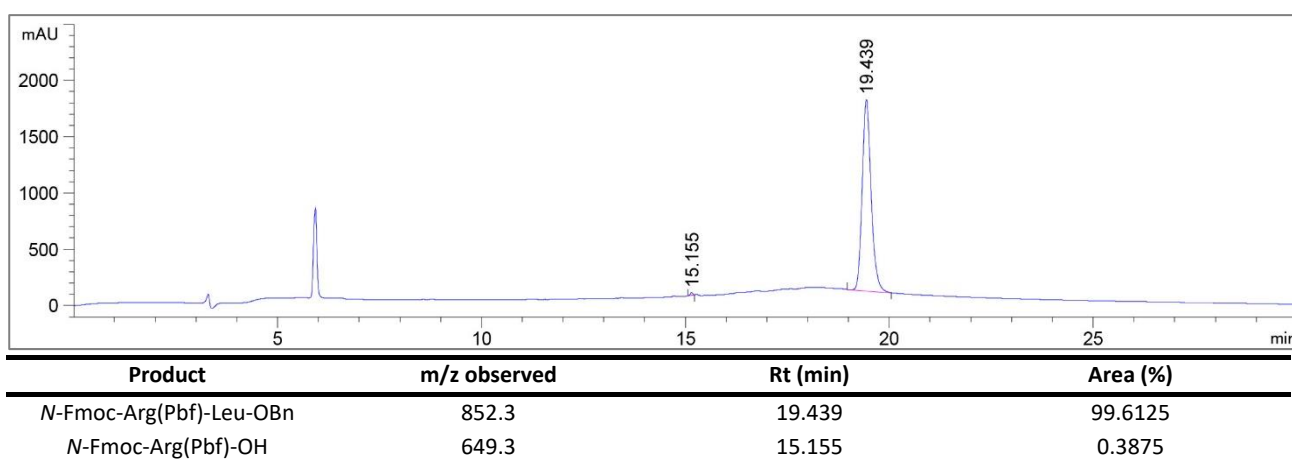

**Figure S34.** Chromatogram of *N*-Fmoc-Arg(Pbf)-Leu-OBn in DCM at 220 nm (entry 11, Table 2 in the article).

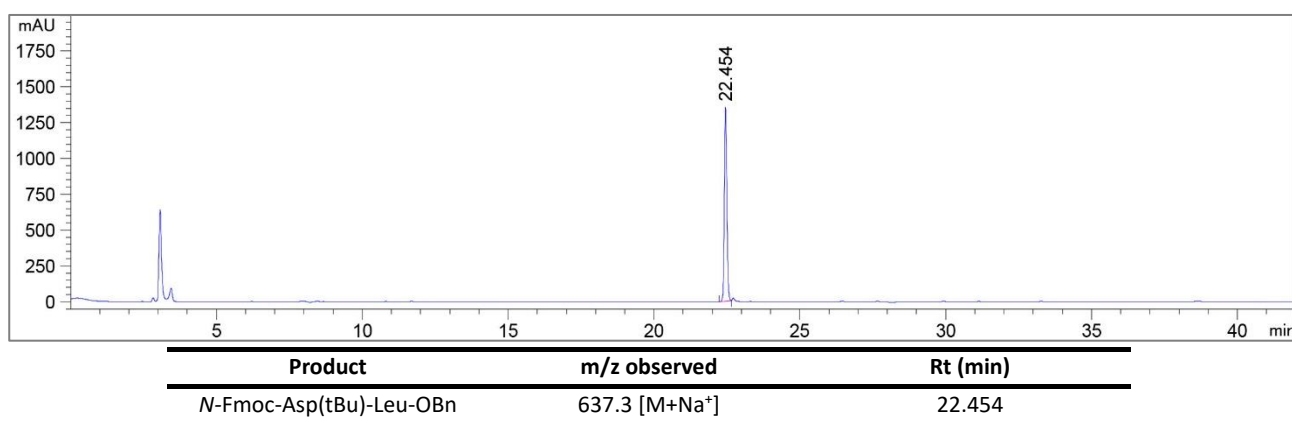

**Figure S35.** Chromatogram of *N*-Fmoc-Asp(tBu)-Leu-OBn in DCM at 220 nm (entry 12, Table 2 in the article). The peak at 3 min is associated with *p*-Toluenesulfonic acid which is salified with H<sub>2</sub>N-Leu-OBn.

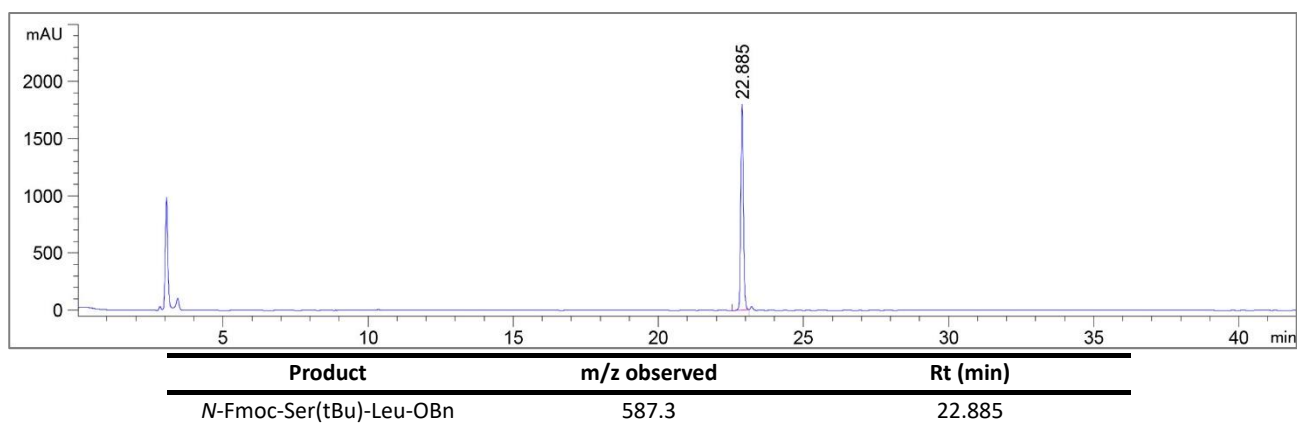

**Figure S36.** Chromatogram of *N*-Fmoc-Ser(tBu)-Leu-OBn in DCM at 220 nm (entry 13, Table 2 in the article). The peak at 3 min is associated with p-Toluenesulfonic acid which is salified with H<sub>2</sub>N-Leu-OBn.

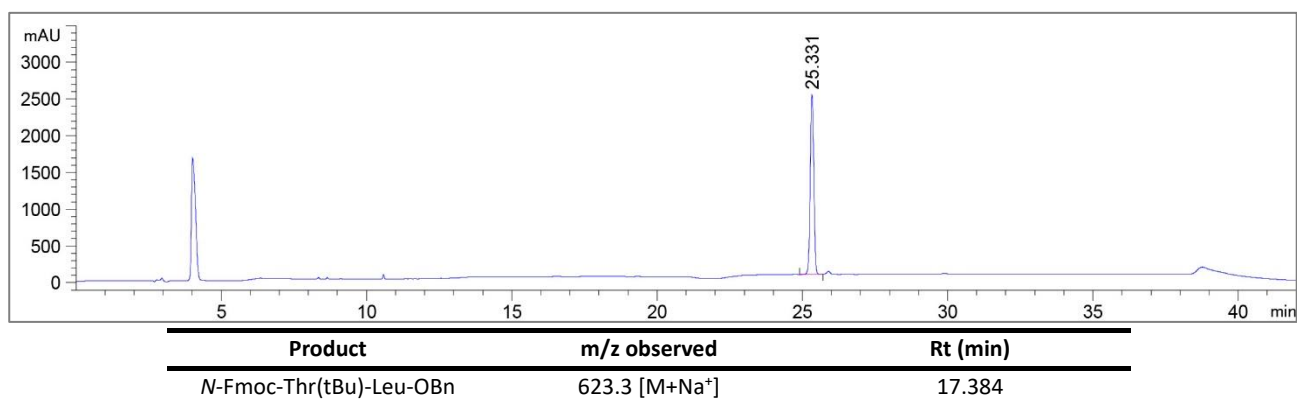

**Figure S37.** Chromatogram of *N*-Fmoc-Thr(tBu)-Leu-OBn in DCM at 220 nm (entry 14, Table 2 in the article). The peak at 3 min is associated with p-Toluenesulfonic acid which is salified with H<sub>2</sub>N-Leu-OBn.

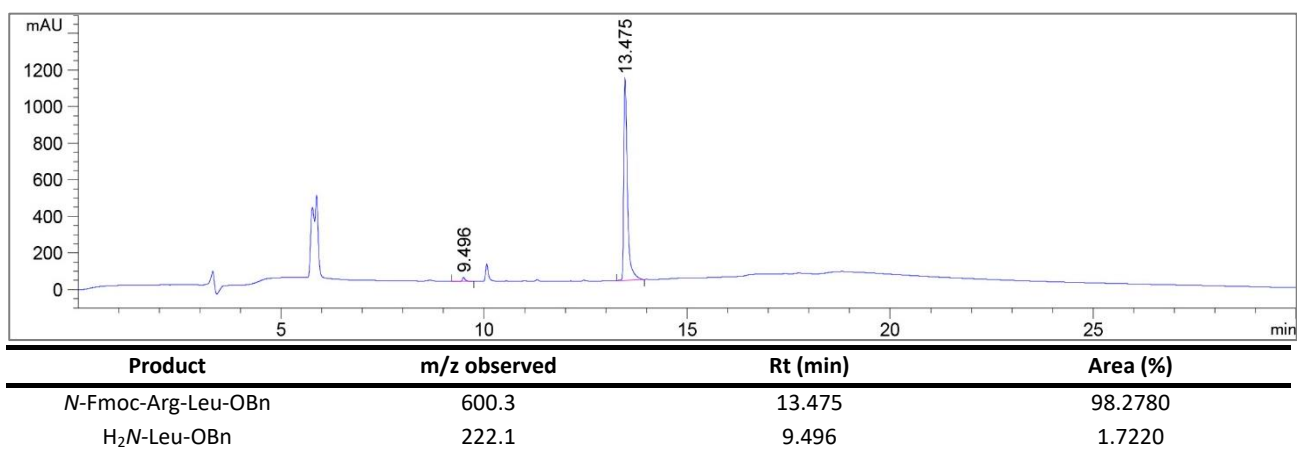

**Figure S38.** Chromatogram of *N*-Fmoc-Arg-Leu-OBn in DCM at 220 nm (entry 15, Table 2 in the article).

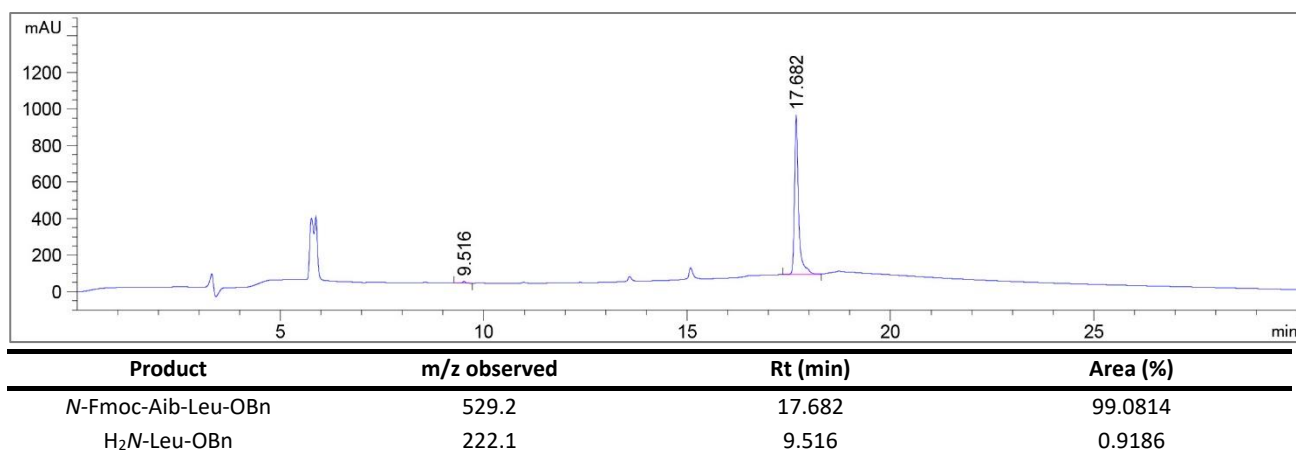

**Figure S39.** Chromatogram of *N*-Fmoc-Aib-Leu-OBn in DCM at 220 nm (entry 16, Table 2 in the article).

#### 4. Racemization evaluation

*N*-Boc-L/D-Phg-Leu-OMe was synthesized as described in the chapter “Materials and Methods” in the main paper. Each diastereomer and their mixture were injected into HPLC using chiral column working at 1 ml/min with Hexane and iPrOH (90:10).

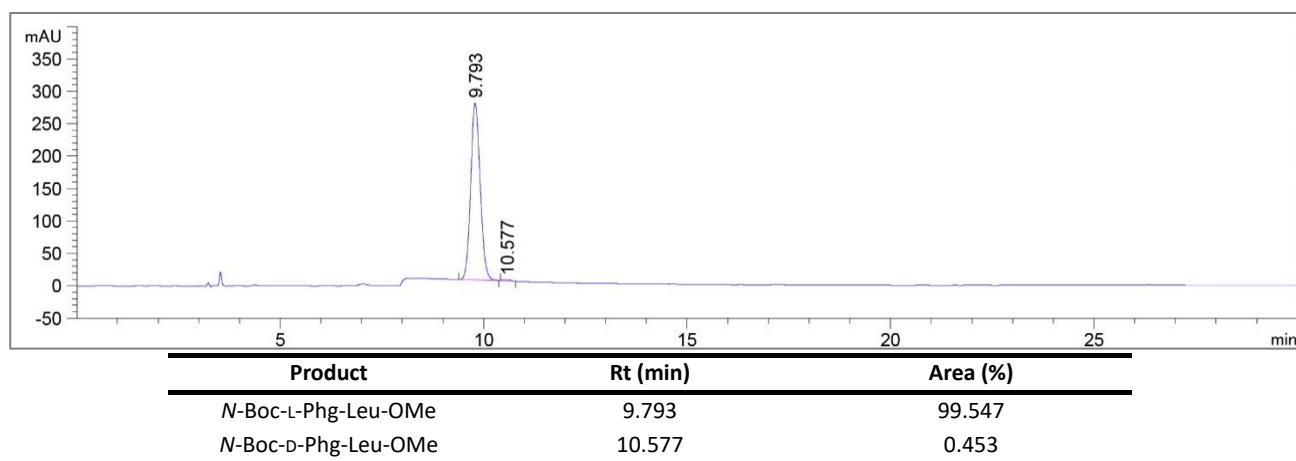

**Figure S40.** Chromatogram of *N*-Boc-L-Phg-Leu-OMe in DCM at 220 nm.

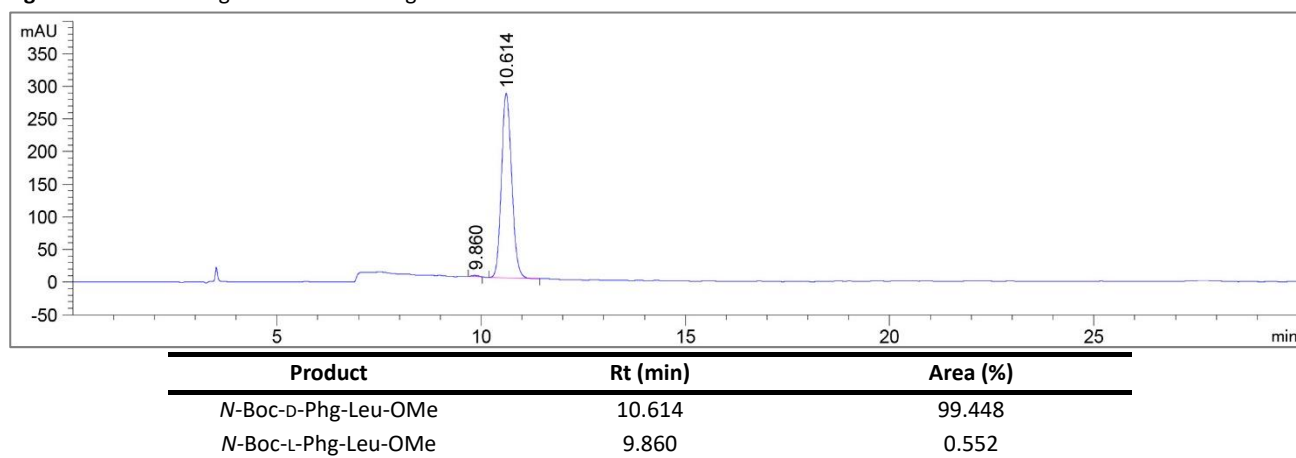

**Figure S41.** Chromatogram of *N*-Boc-D-Phg-Leu-OMe in DCM at 220 nm.

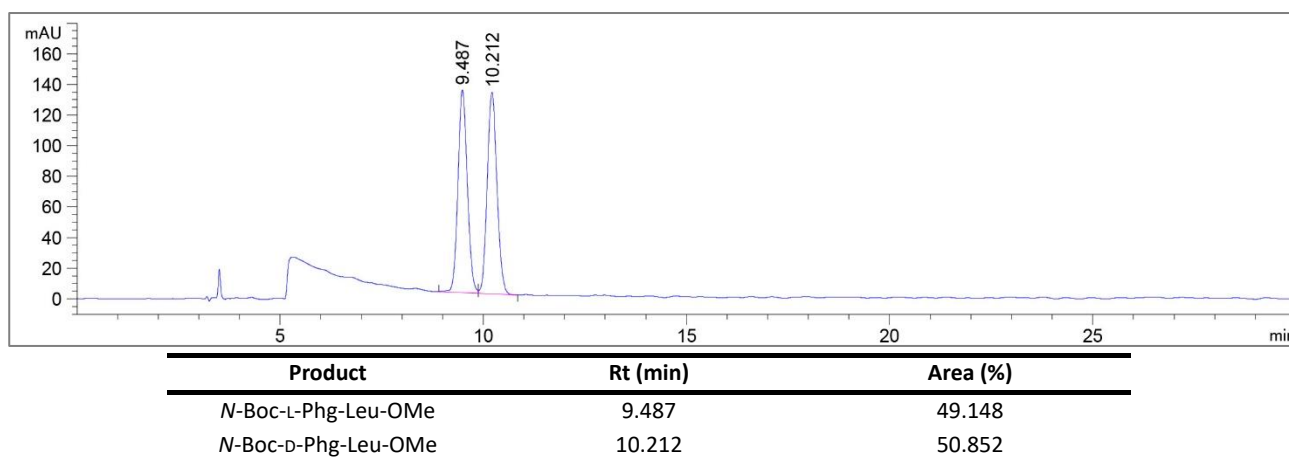

**Figure S42.** Chromatogram of a mixture between *N*-Boc-L-Phg-Leu-OMe and *N*-Boc-D-Phg-Leu-OMe at 220 nm.

## 5. HPLC chromatogram: SolPPS of Leu-Enkephalin precursor *via N*-Boc chemistry

### Intermediate isolation

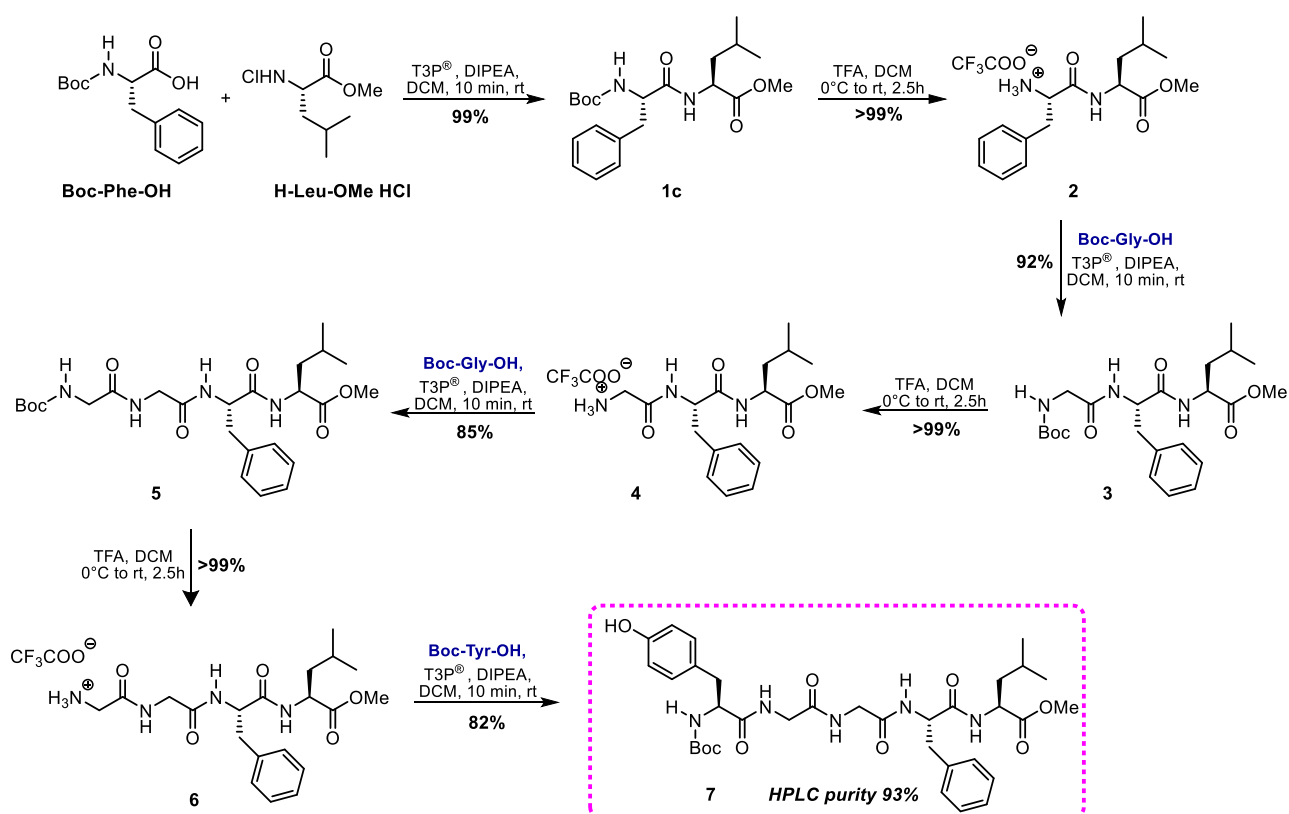

**Scheme S2.** SolPPS of *N*-Boc-Leu-Enkephalin-OMe **7** (reported yields refer to crude reactions).

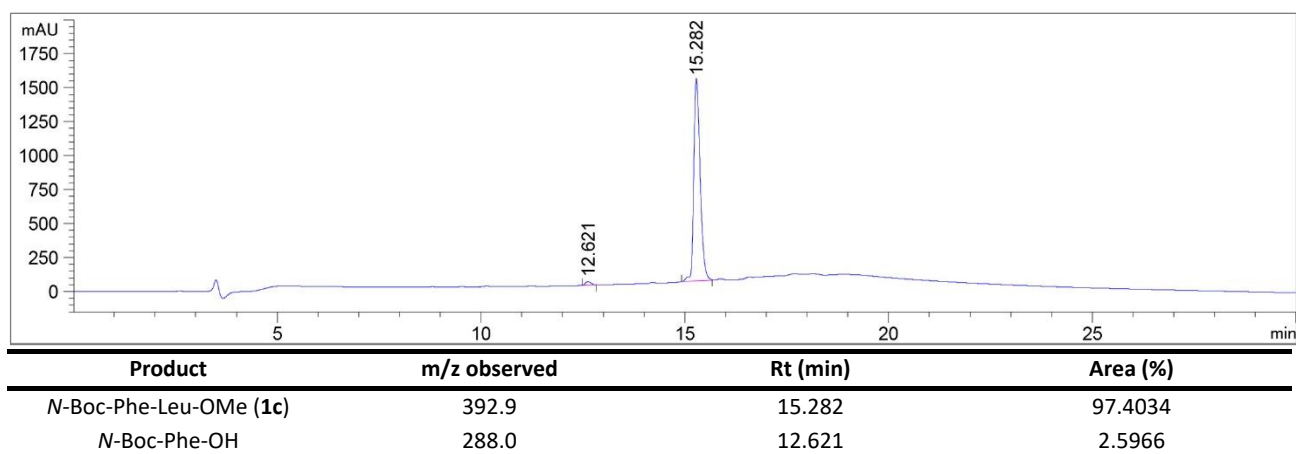

**Figure S43.** Chromatogram of intermediate *N*-Boc-Phe-Leu-OMe (**1c**) in the synthesis of Leu-Enkephalin precursor.

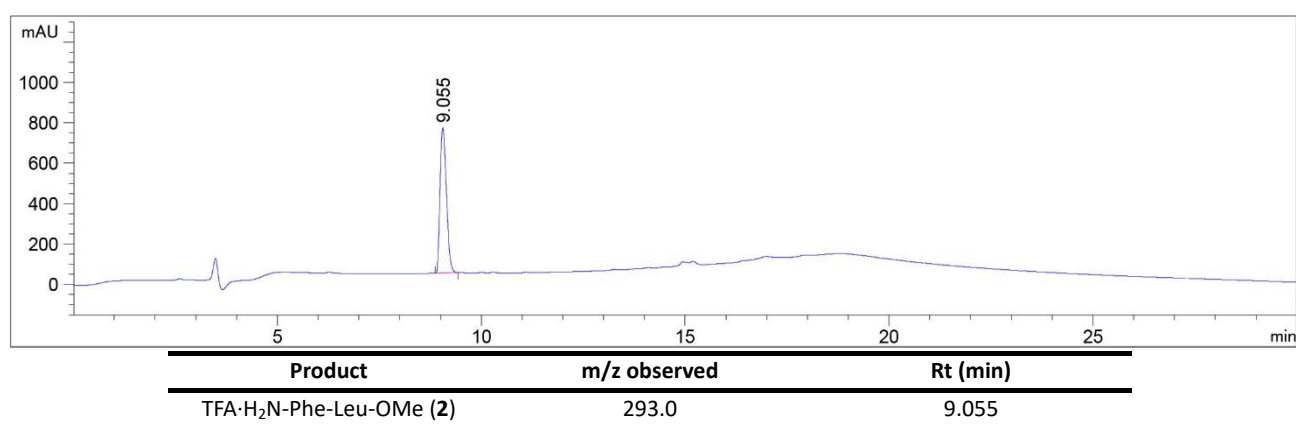

**Figure S44.** Chromatogram of intermediate TFA·H<sub>2</sub>N-Phe-Leu-OMe (**2**) in the synthesis of Leu-Enkephalin precursor.

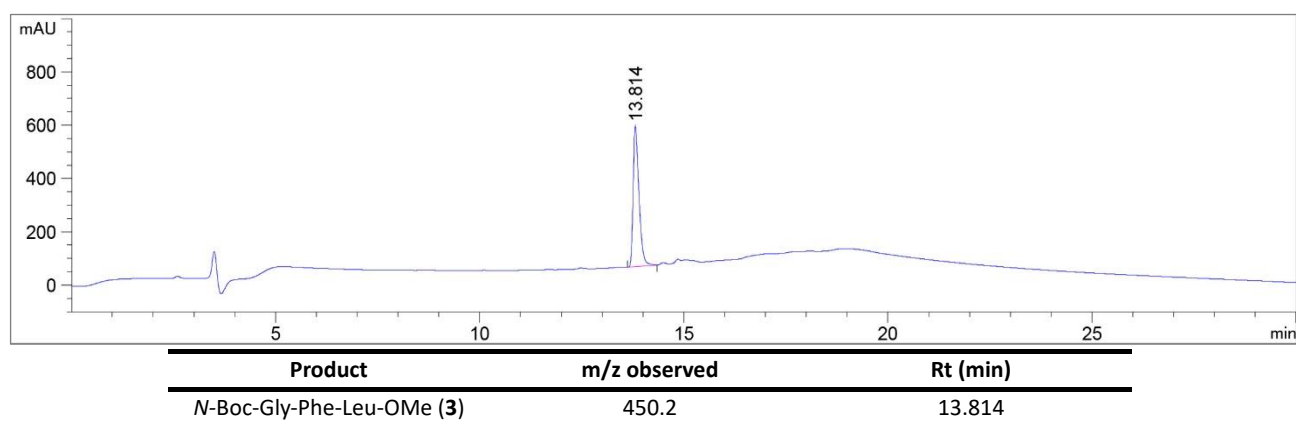

**Figure S45.** Chromatogram of intermediate *N*-Boc-Gly-Phe-Leu-OMe (**3**) in the synthesis of Leu-Enkephalin precursor.

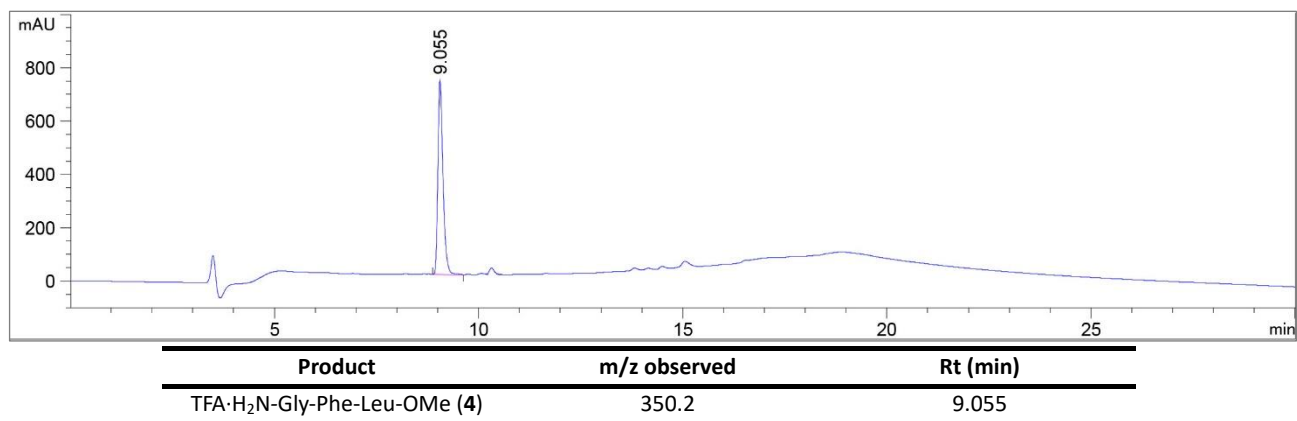

**Figure S46.** Chromatogram of intermediate TFA·H<sub>2</sub>N-Gly-Phe-Leu-OMe (4) in the synthesis of Leu-Enkephalin precursor.

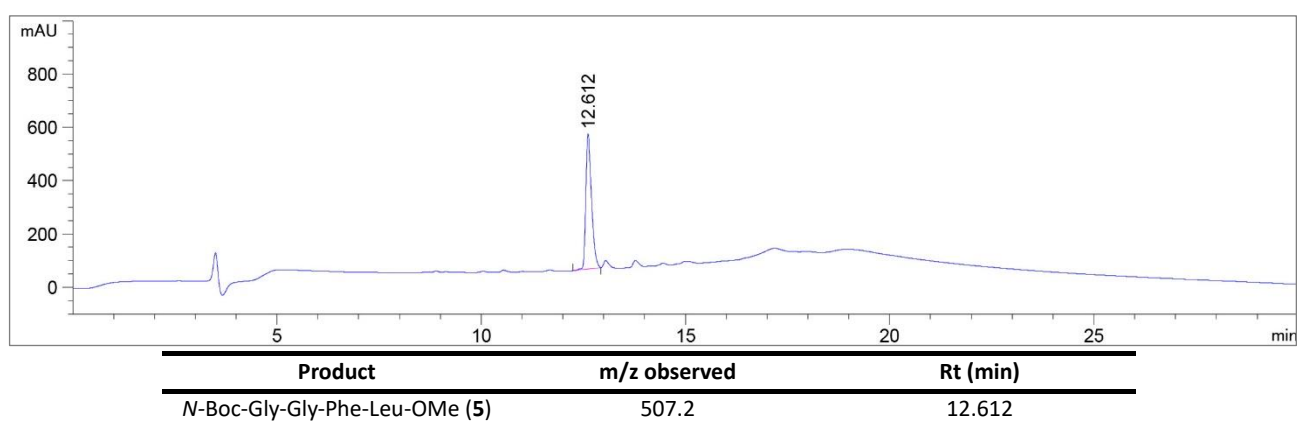

**Figure S47.** Chromatogram of intermediate N-Boc-Gly-Gly-Phe-Leu-OMe (5) in the synthesis of Leu-Enkephalin precursor.

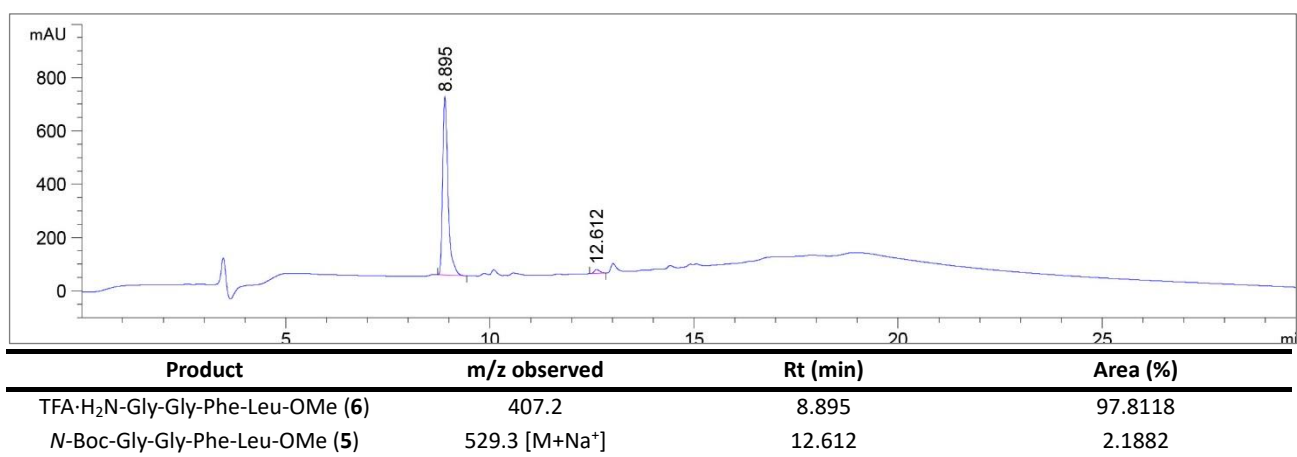

**Figure S48.** Chromatogram of intermediate TFA·H<sub>2</sub>N-Gly-Gly-Phe-Leu-OMe (6) in the synthesis of Leu-Enkephalin precursor.

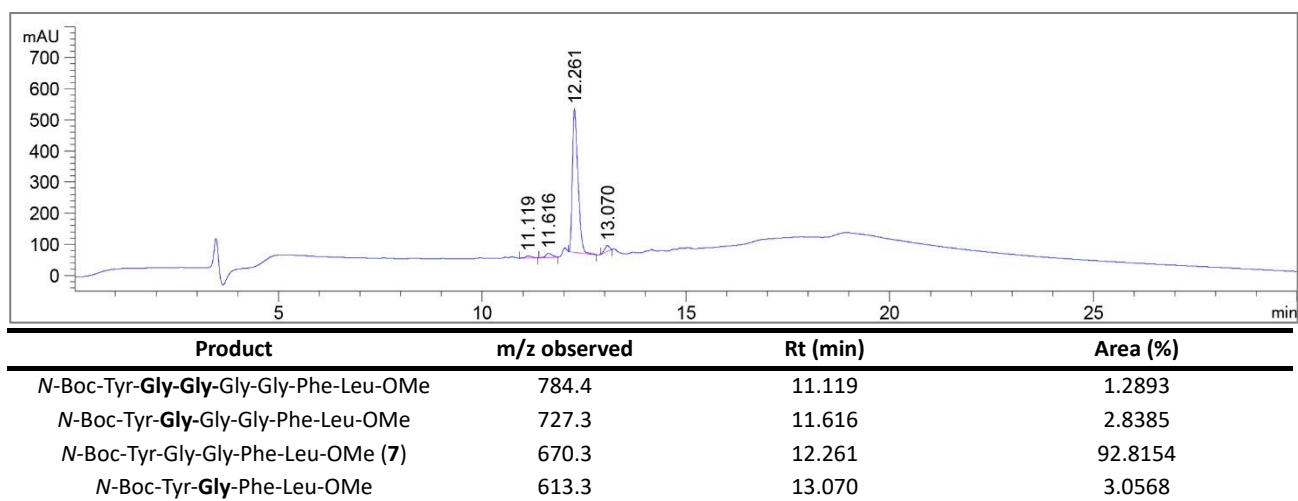

**Figure S49.** Chromatogram of Leu-Enkephalin precursor (**7**).

### Continuous protocol

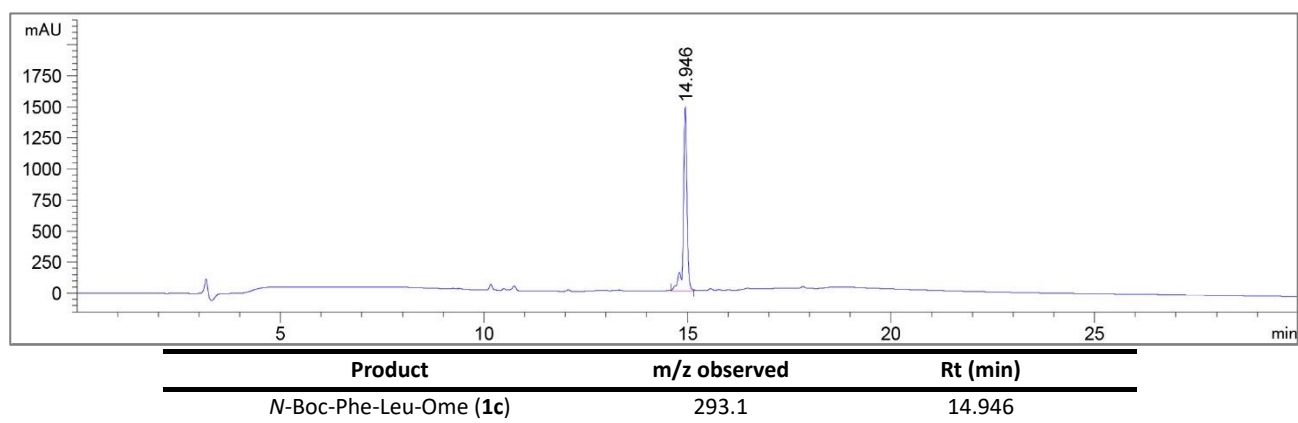

**Figure S50.** Chromatogram of intermediate *N*-Boc-Phe-Leu-OMe (**1c**) in the synthesis of Leu-Enkephalin precursor.

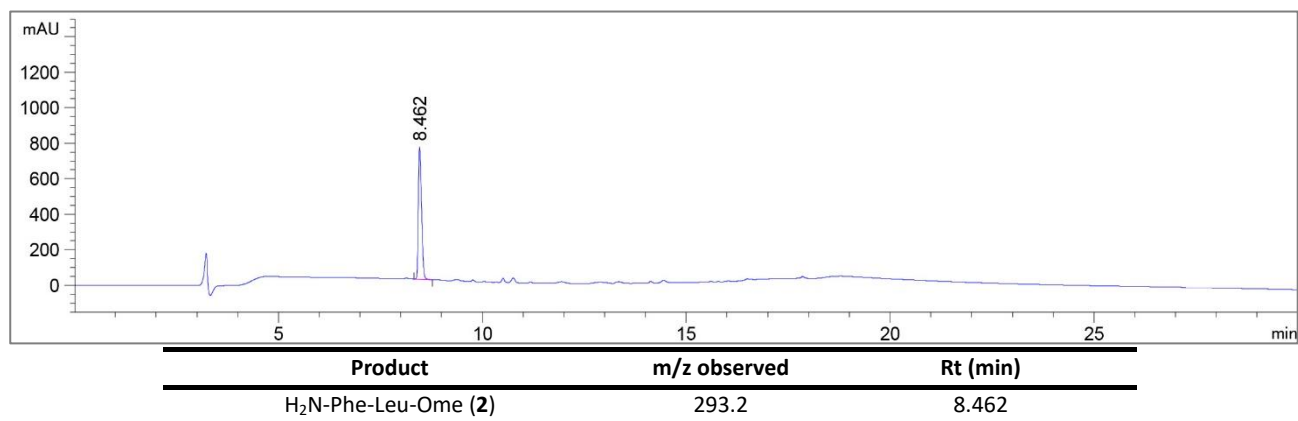

**Figure S51.** Chromatogram of intermediate H<sub>2</sub>N-Phe-Leu-OMe (**2**) in the synthesis of Leu-Enkephalin precursor.

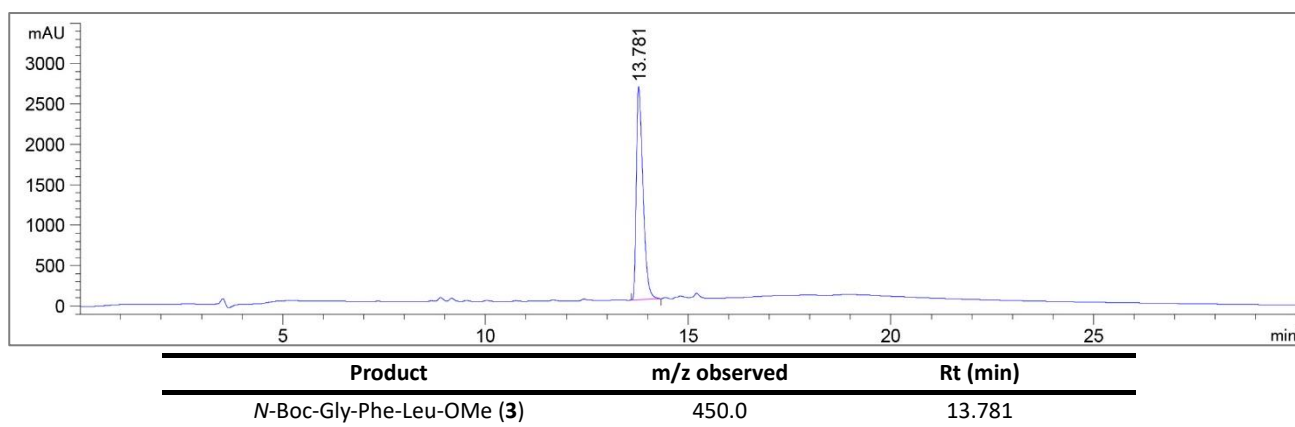

**Figure S52.** Chromatogram of intermediate *N*-Boc-Gly-Phe-Leu-OMe (**3**) in the synthesis of Leu-Enkephalin precursor.

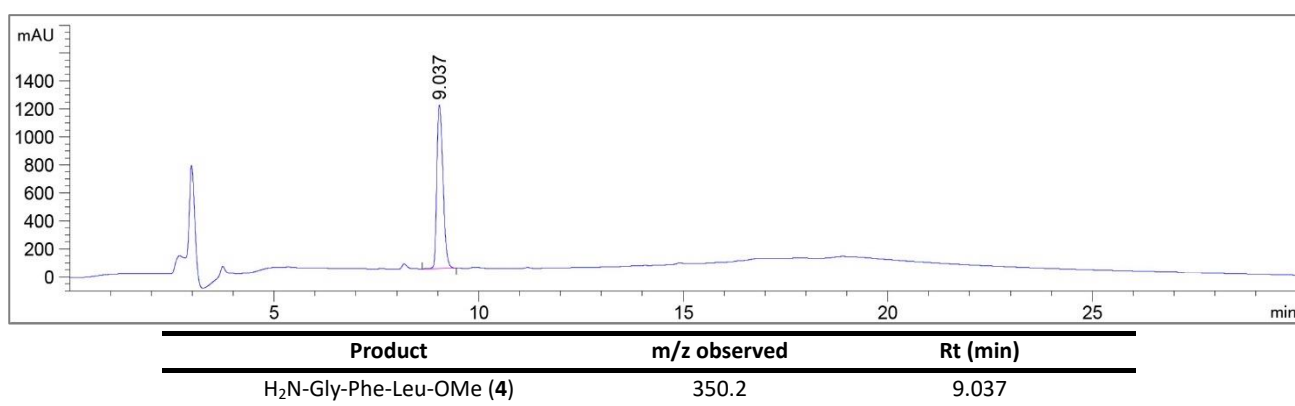

**Figure S53.** Chromatogram of intermediate H<sub>2</sub>N-Gly-Phe-Leu-OMe (**4**) in the synthesis of Leu-Enkephalin precursor.

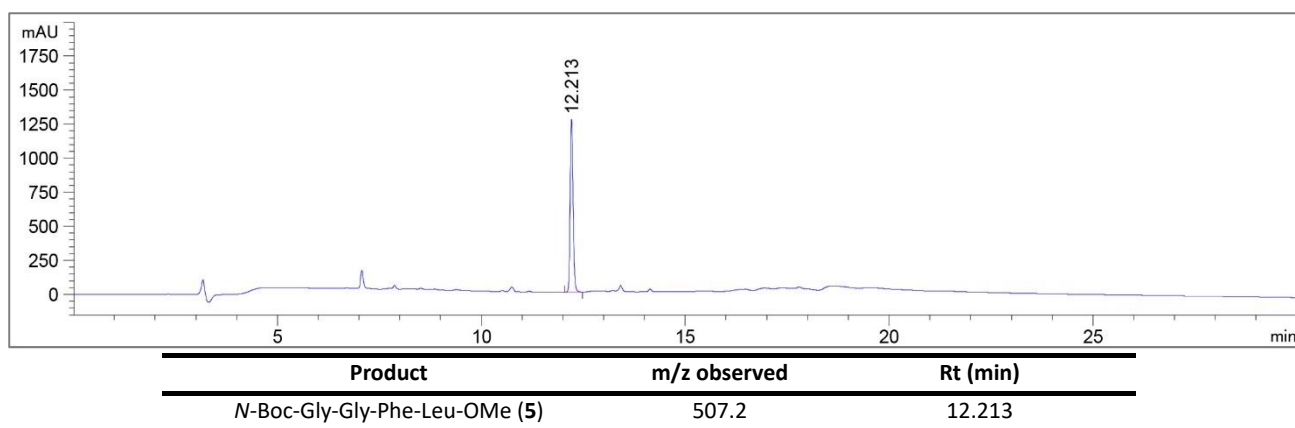

**Figure S54.** Chromatogram of intermediate *N*-Boc-Gly-Gly-Phe-Leu-OMe (**5**) in the synthesis of Leu-Enkephalin precursor.

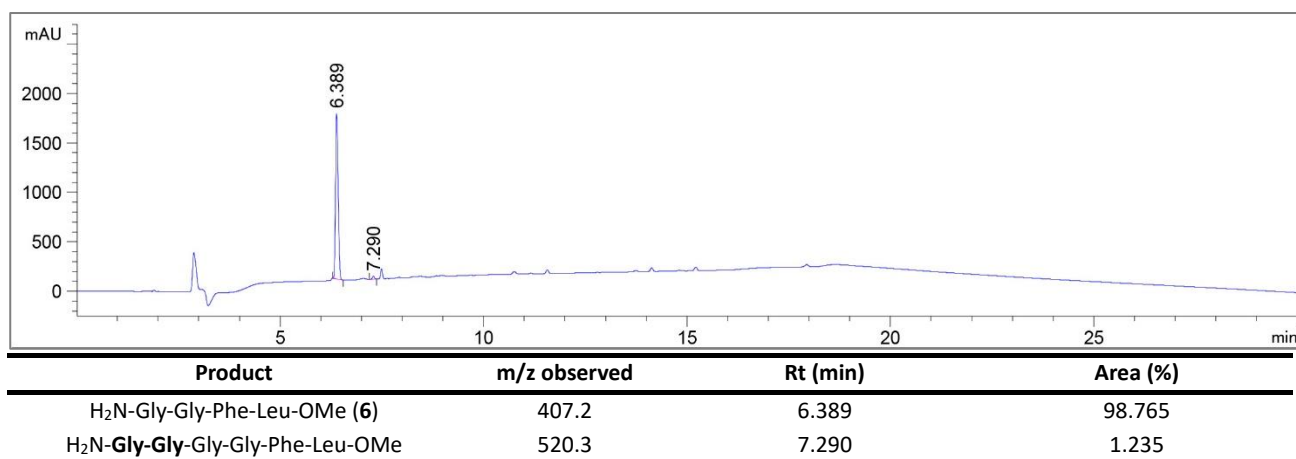

**Figure S55.** Chromatogram of intermediate H<sub>2</sub>N-Gly-Gly-Phe-Leu-OMe (**6**) in the synthesis of Leu-Enkephalin precursor.

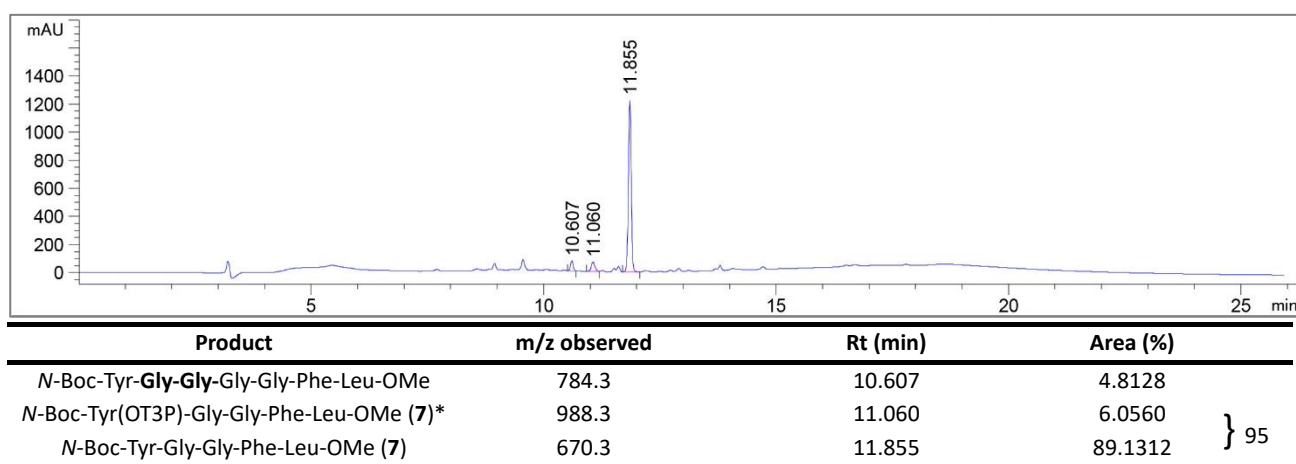

\* Phosphorylated intermediate spontaneously hydrolysed to compound **7** after acidic work-up.

**Figure S56.** Chromatogram of Leu-Enkephalin precursor (**7**).

## 6. HPLC Chromatograms: Full LPPS of Leu-Enkephalin via N-Fmoc chemistry

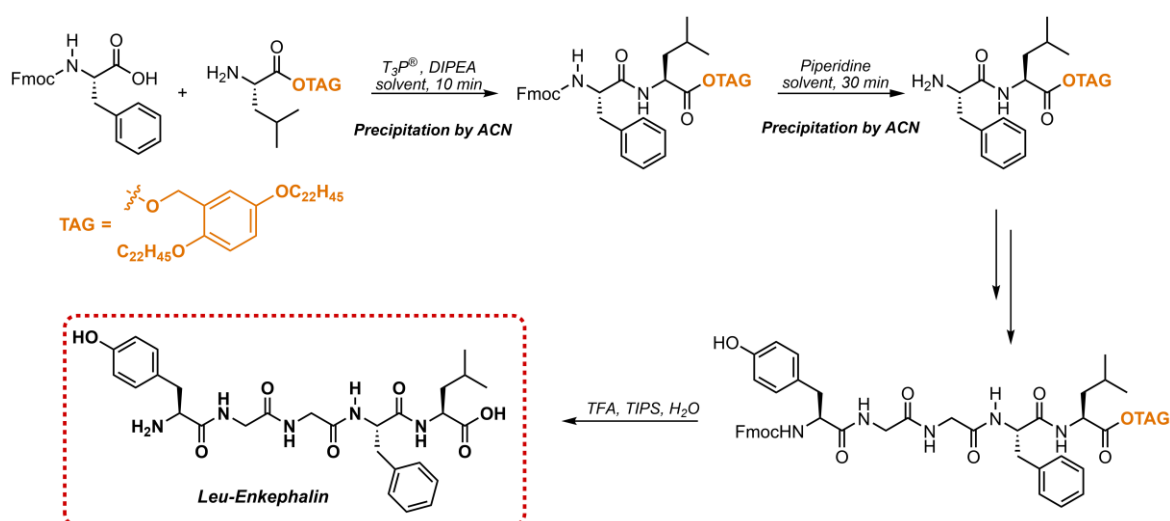

**Scheme S3.** LPPS of Leu-Enkephalin using polycarbon tag.

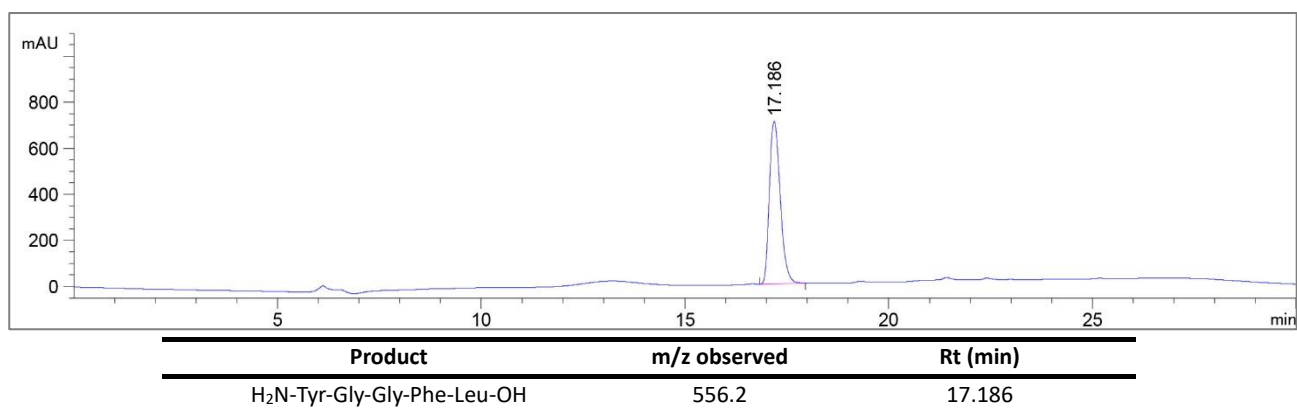

**Figure S57.** Chromatogram of Leu-Enkephalin in DCM precipitating after each step during the synthesis.

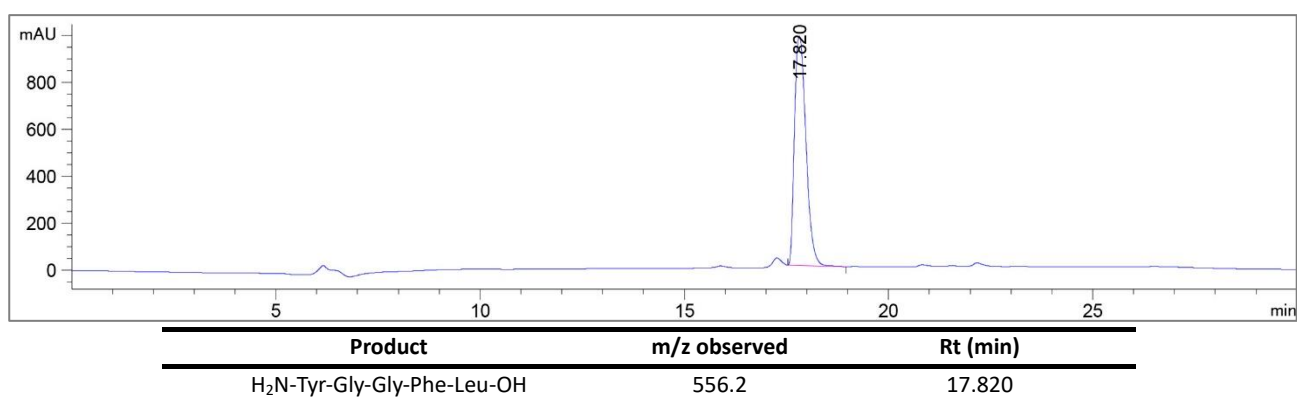

**Figure S58.** Chromatogram of Leu-Enkephalin in DCM precipitating after deprotection during the synthesis.

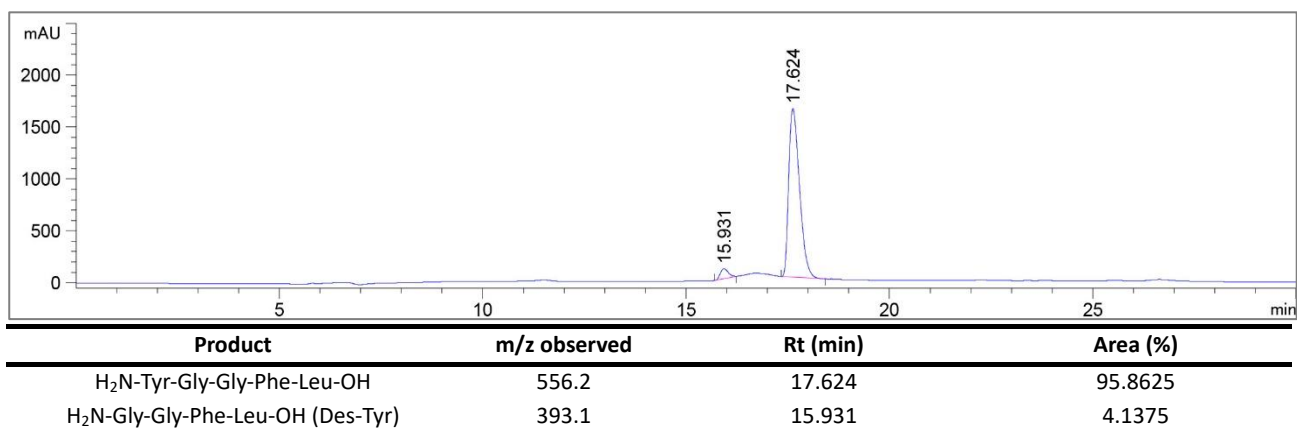

**Figure S59.** Chromatogram of Leu-Enkephalin in Anisole precipitating after each step during the synthesis.

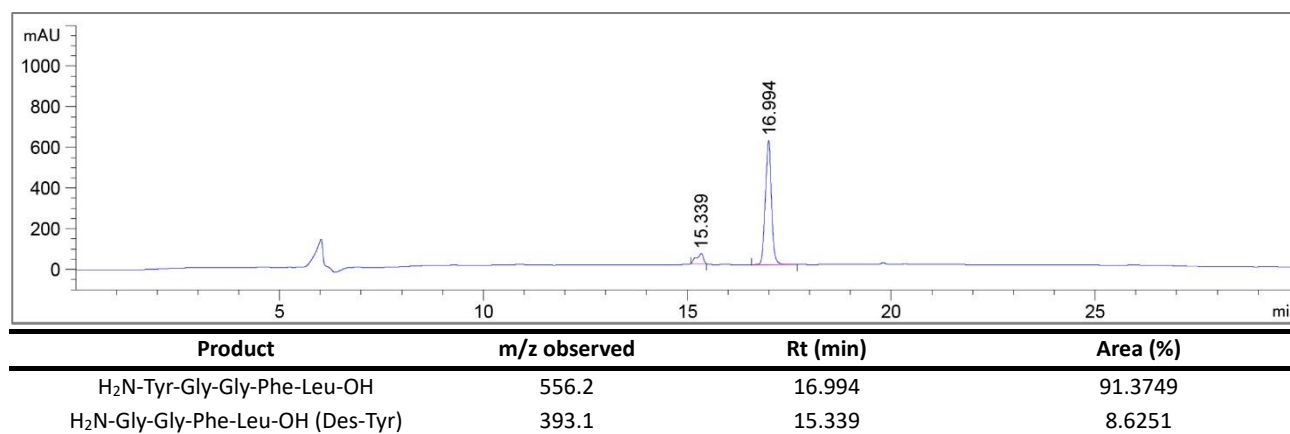

**Figure S60.** Chromatogram of Leu-Enkephalin in Anisole precipitating after deprotection during the synthesis. The peak around 6 min is related to TFA added directly into the vial.

### 6.1 Epimers of Leu-Enkephalin synthesized by SPPS

To verify the stereochemical purity of the synthesized Leu-Enkephalin all the epimers as reference were synthesized through SPPS in DMF.

Manual syntheses of Leu-Enkephalin epimers were carried out at room temperature in glass syringes fitted with a polyethylene porous disc and connected to a vacuum source to remove excess reagents and solvents. The syntheses were carried out by using Wang-PS resin (200 mg, loading 1.2 mmol g<sup>-1</sup>). After swelling of the resin in 2 mL of DMF, a solution of *N*-Fmoc-Leu-OH ( or *N*-(D)-Fmoc-Leu-OH; 2.5 eq. respect to the loading of the resin), DIC (1.25 eq.) and DMAP (0.1 eq.) in DMF, preactivated for 5 min, was charged onto the resin and stirred for 1 h and the resin was washed with DMF (3x2 mL). The Fmoc protective group was removed by 20% piperidine in DMF (2 × 2 mL, 15 min each) and the resin was washed with DMF (3 × 2 mL). *N*-Fmoc-Phe-OH (or *N*-Fmoc-(D)-Phe-OH), *N*-Fmoc-Gly-OH and *N*-Fmoc-Tyr(tBu)-OH (or *N*-Fmoc-(D)-Tyr(tBu)-OH; 2 eq.) were diluted in DMF (2, 5 mL), pre-activated by DIC and OxymaPure® (3 eq.) for 3 min and coupled to the resin in 60 min. After each coupling step, the Fmoc protective group was removed by treating the peptide resin with a 20% piperidine solution in DMF (2 × 2 mL, 15 min each) and the resin was washed with DMF (3 × 2 mL). After the Fmoc-cleavage of the N-terminal alpha-amino group, the peptide resin was washed with DMF (3 × 2 mL) and DCM (3 × 2 mL). The dry peptide resin was suspended in 5 mL of the mixture TFA/TIS/H<sub>2</sub>O (95/2.5/2.5 v/v/v) and stirred for 2 h. The resin was filtered off and diisopropylether (20 mL) cooled to 4 °C was added to the solution. The peptide was filtered and dried in vacuo to obtain crude epimers of Leu-Enkephalin. The relative chromatograms are reported in Fig. S61–S64.

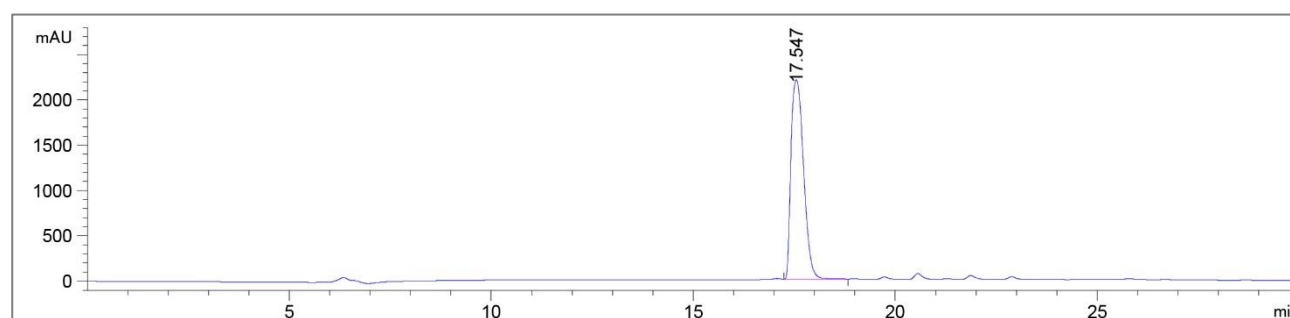

**Figure S61.** Chromatogram of Leu-Enkephalin synthesized by SPPS.

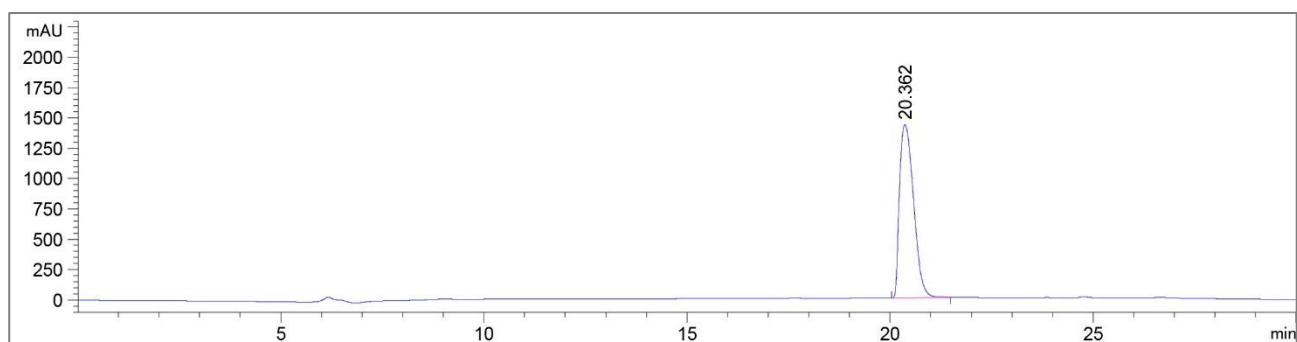

**Figure S62.** Chromatogram of Leu-Enkephalin epimer with D-Leu synthesized by SPPS.

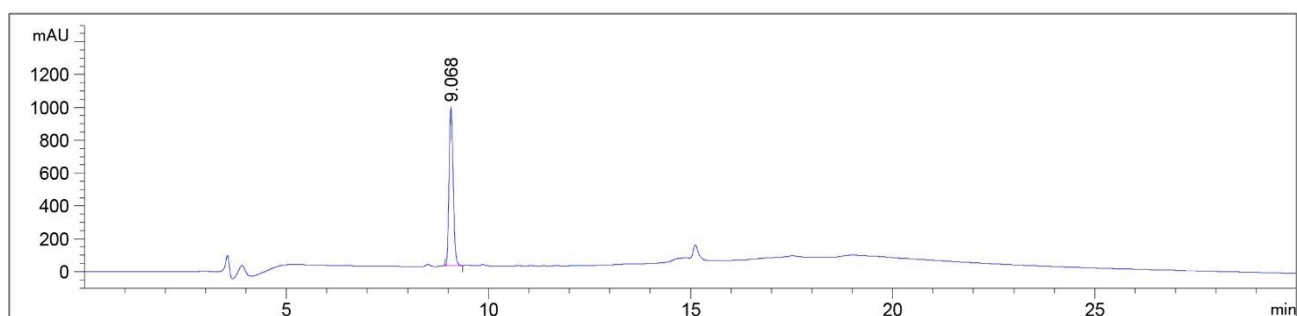

**Figure S63.** Chromatogram of Leu-Enkephalin epimer with D-Phe synthesized by SPPS.

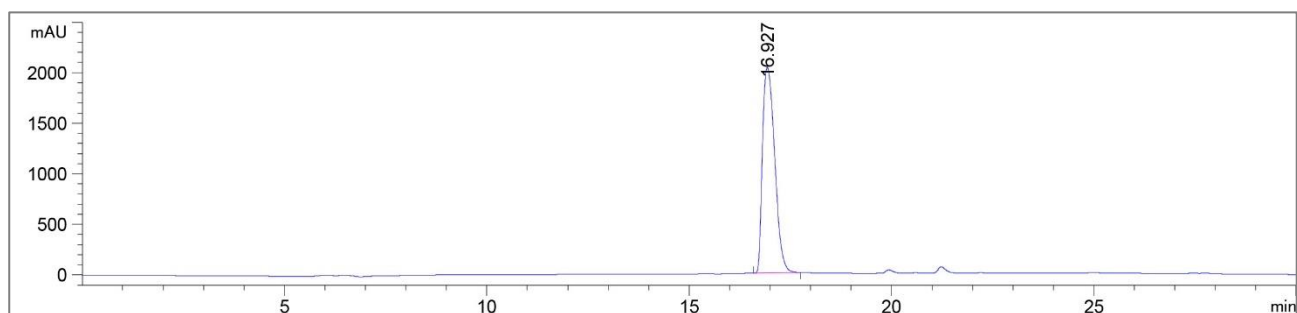

**Figure S64.** Chromatogram of Leu-Enkephalin epimer with D-Tyr synthesized by SPPS.

## 7. HPLC Chromatograms: Solvents and amino acids

### Solvents

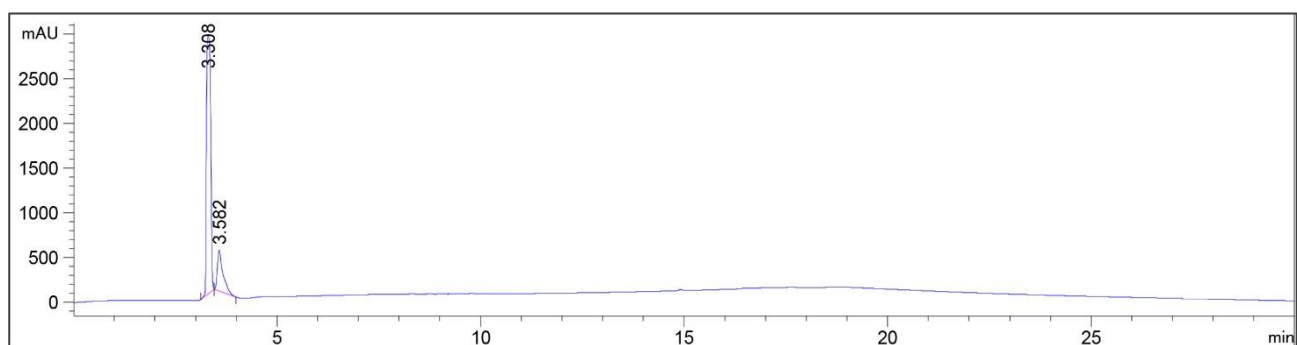

**Figure S65.** Chromatogram of DMF.

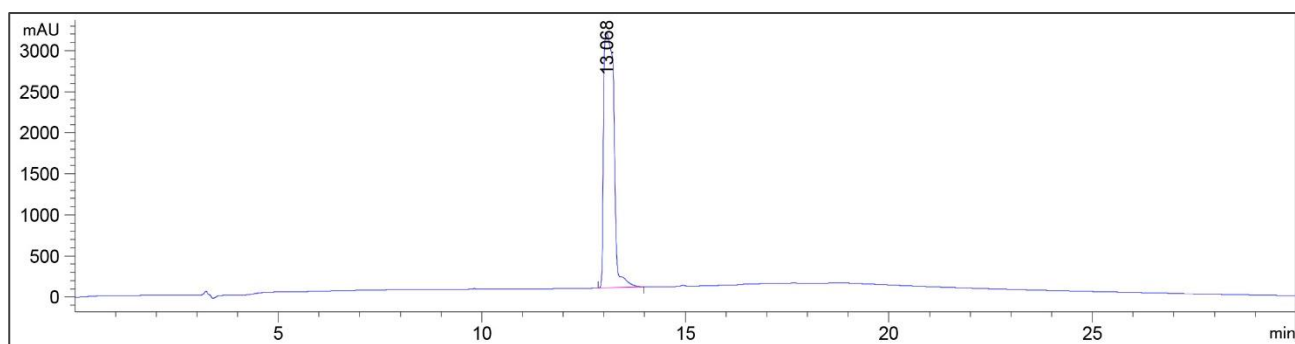

Figure S66. Chromatogram of Anisole.

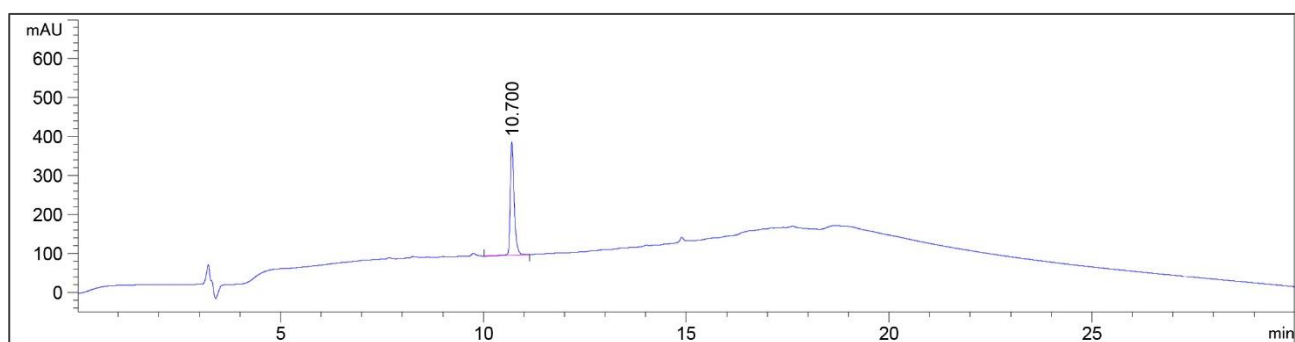

Figure S67. Chromatogram of PrOAc.

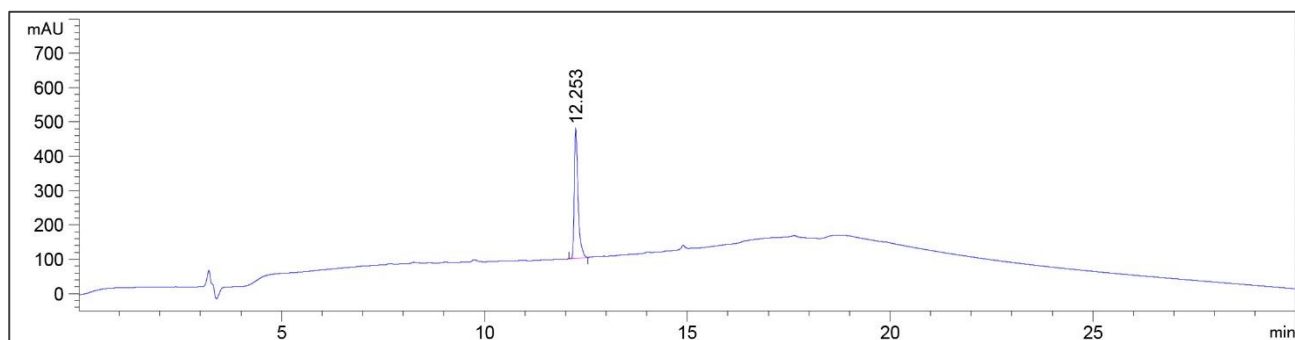

Figure S68. Chromatogram of tBuOAc.

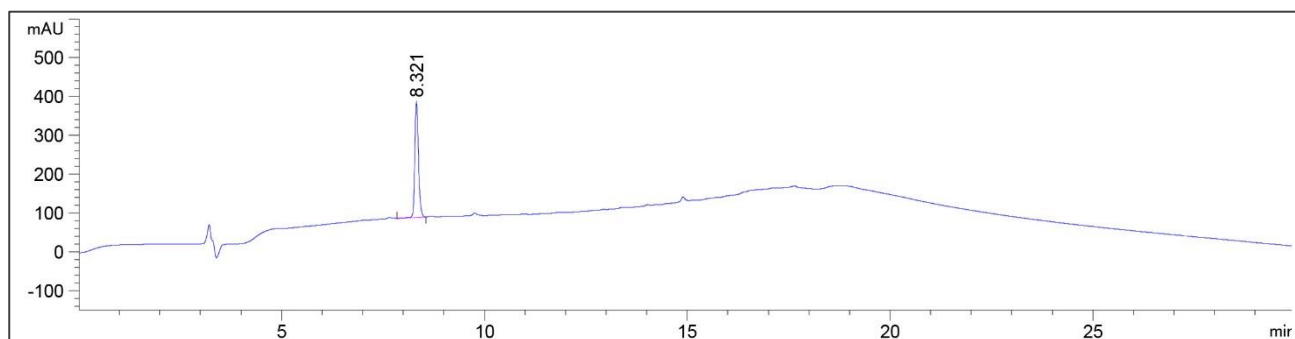

Figure S69. Chromatogram of EtOAc.

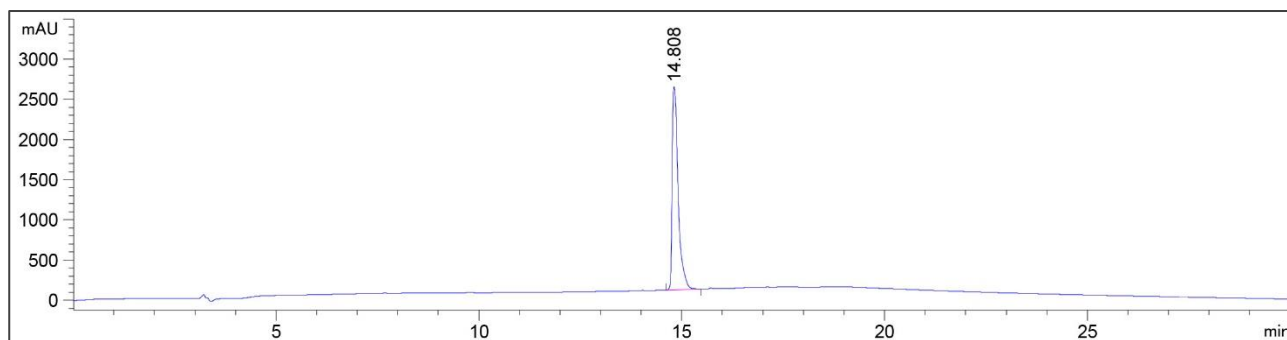

**Figure S70.** Chromatogram of NOP.

### **Amino acids**

Amino acids were injected into HPLC by analytical method A, described in Chapter 1 of this file. Only in the cases of *N*-Fmoc-Thr(*t*Bu)-OH, *N*-Fmoc-Ser(*t*Bu)-OH and *N*-Fmoc-Asp(*t*Bu)-OH, it was used method C because the respective dipeptides did not elute with the former method.

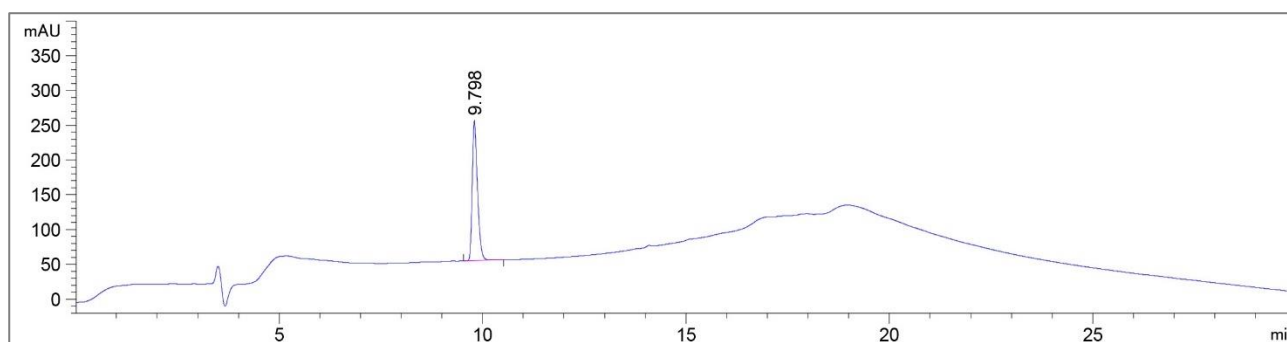

**Figure S71.** Chromatogram of *N*-Boc-Aib-OH.

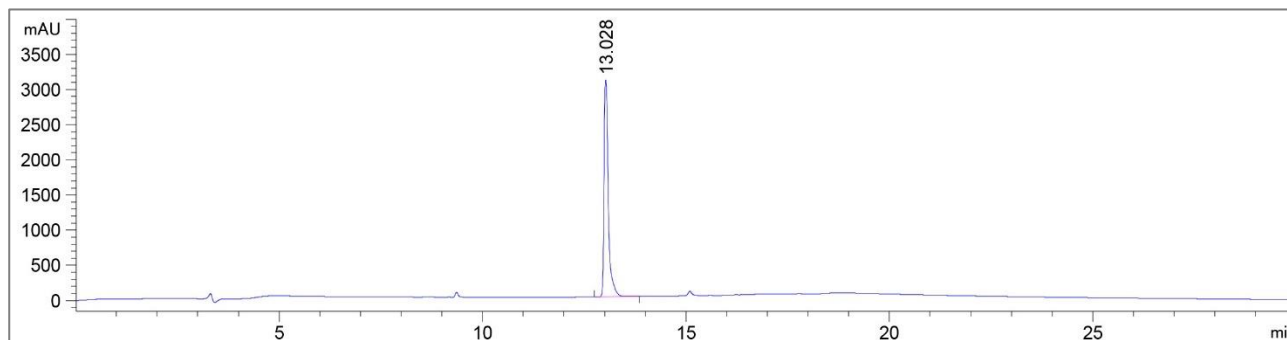

**Figure S72.** Chromatogram of *N*-Boc-Arg(PBF)-OH.

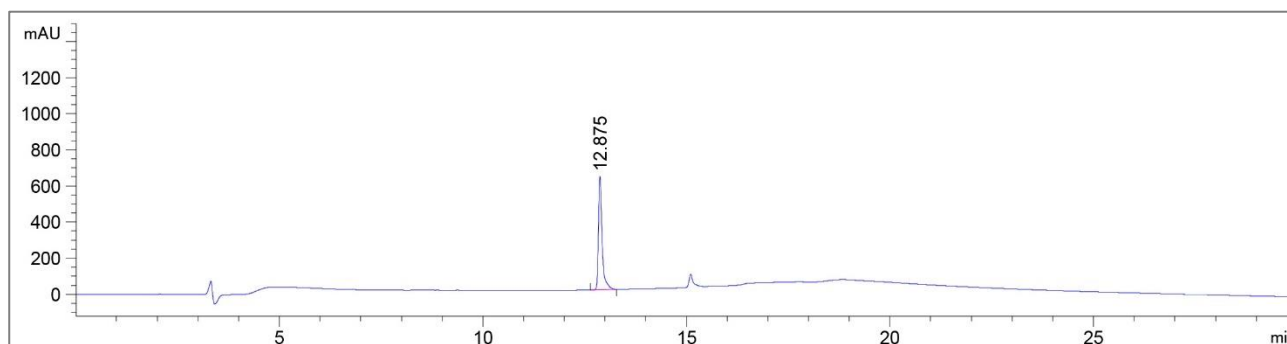

**Figure S73.** Chromatogram of *N*-Boc-Asp(Bzl)-OH.

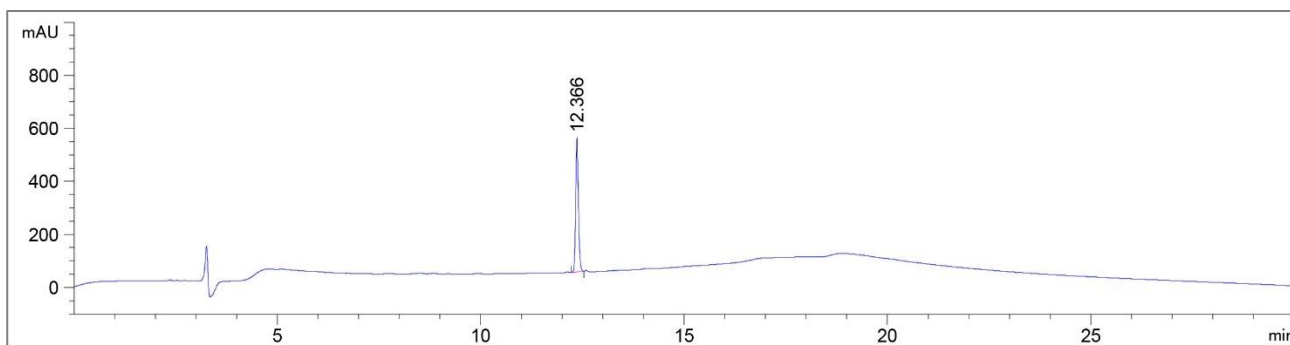

**Figure S74.** Chromatogram of *N*-Boc-Leu-OH.

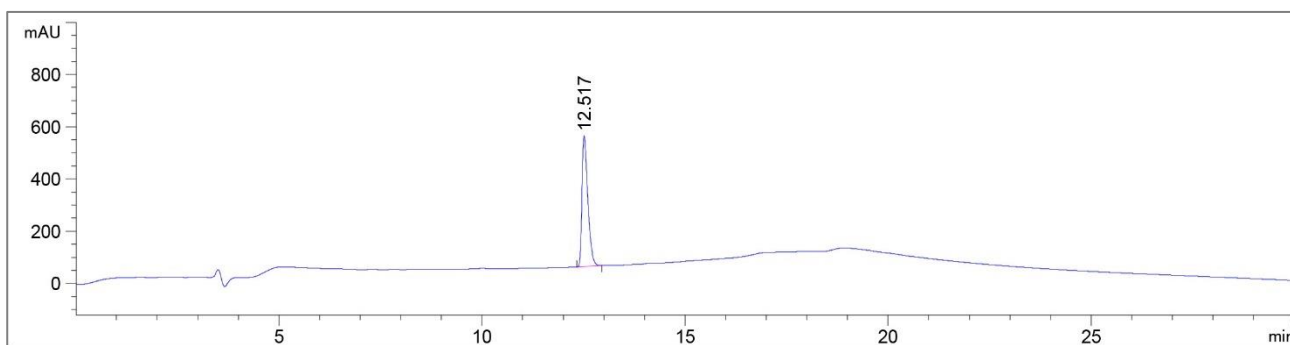

**Figure S75.** Chromatogram of *N*-Boc-Phe-OH.

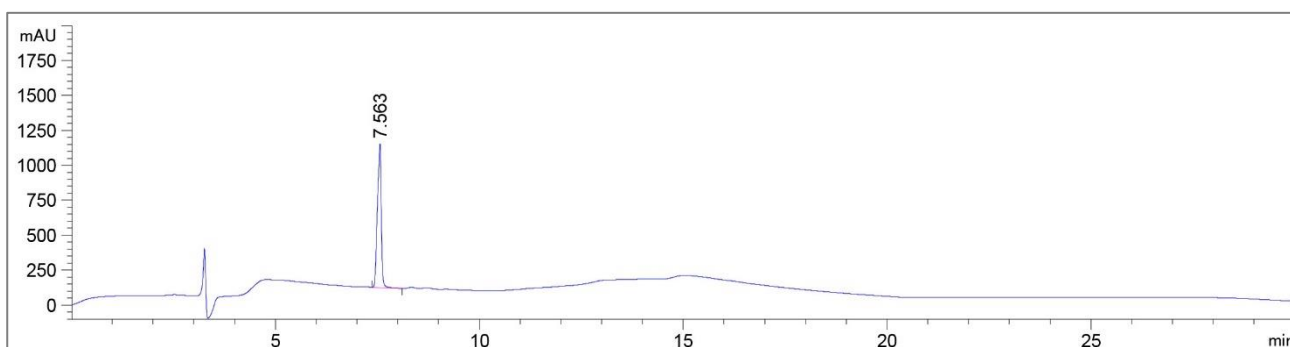

**Figure S76.** Chromatogram of *N*-Boc-Ser-OH.

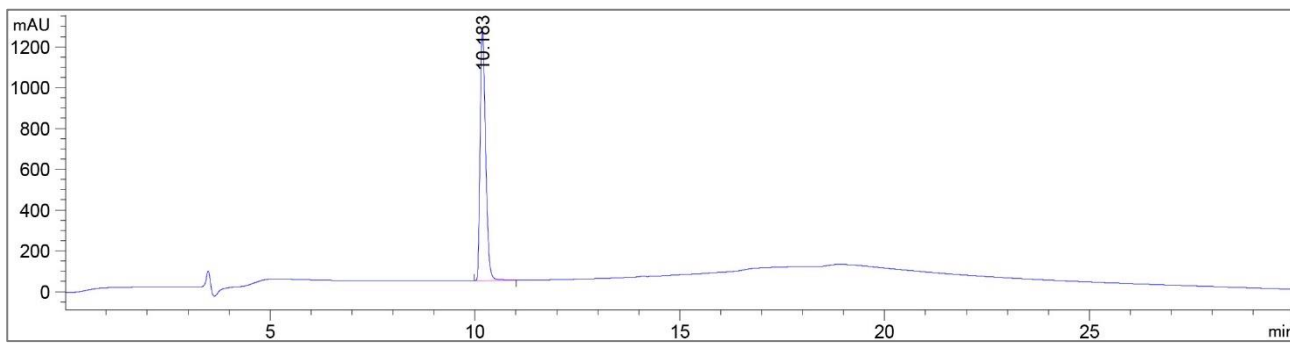

**Figure S77.** Chromatogram of *N*-Boc-Trp-OH.

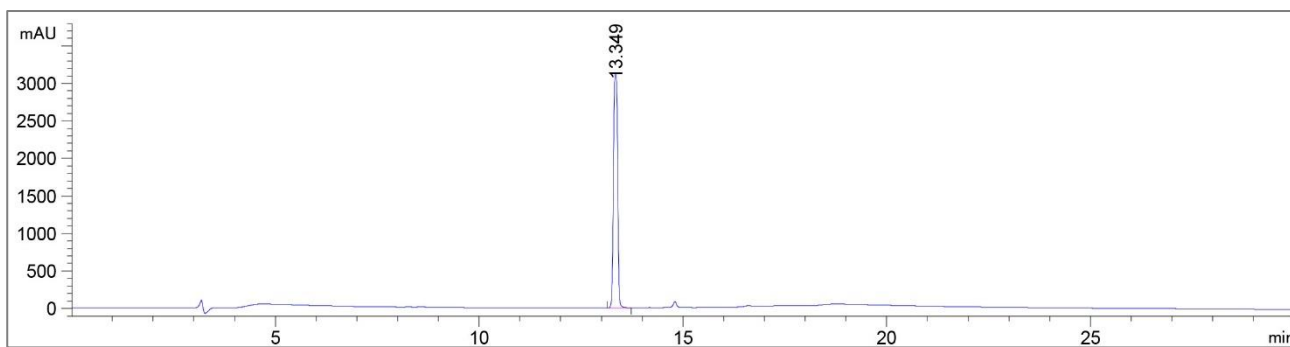

**Figure S78.** Chromatogram of *N*-Fmoc-Aib-OH.

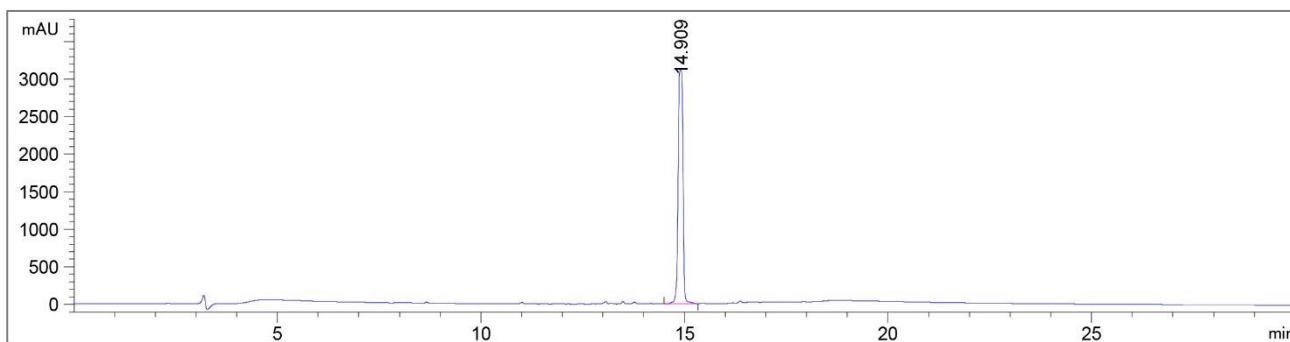

**Figure S79.** Chromatogram of *N*-Fmoc-Arg(PBF)-OH.

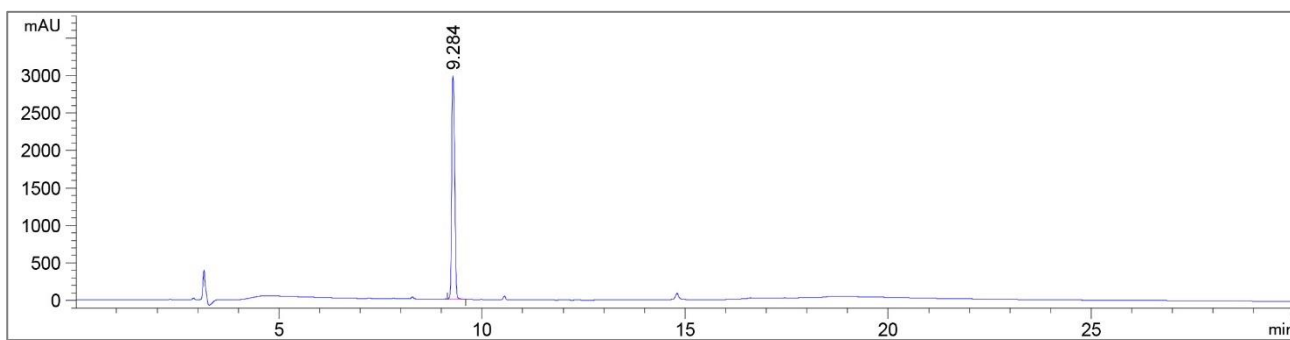

**Figure S80.** Chromatogram of *N*-Fmoc-Arg(HCl)-OH.

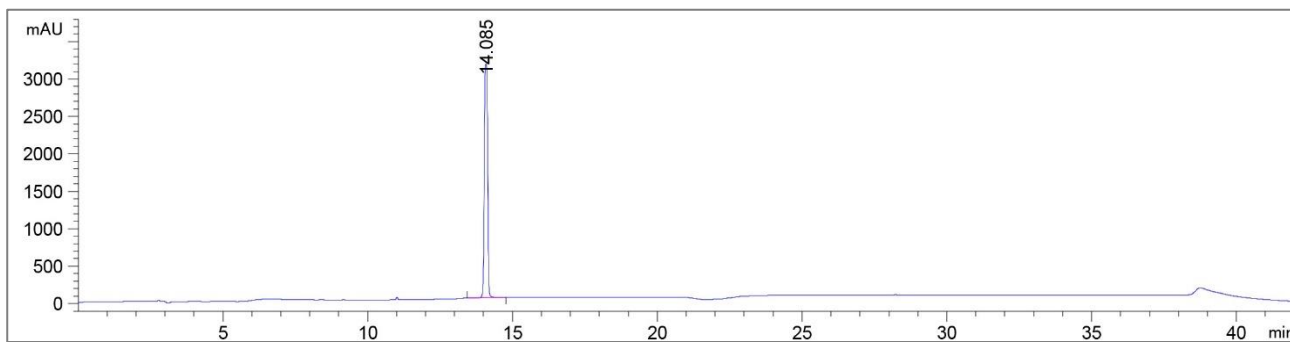

**Figure S81.** Chromatogram of *N*-Fmoc-Asp(tBu)-OH.

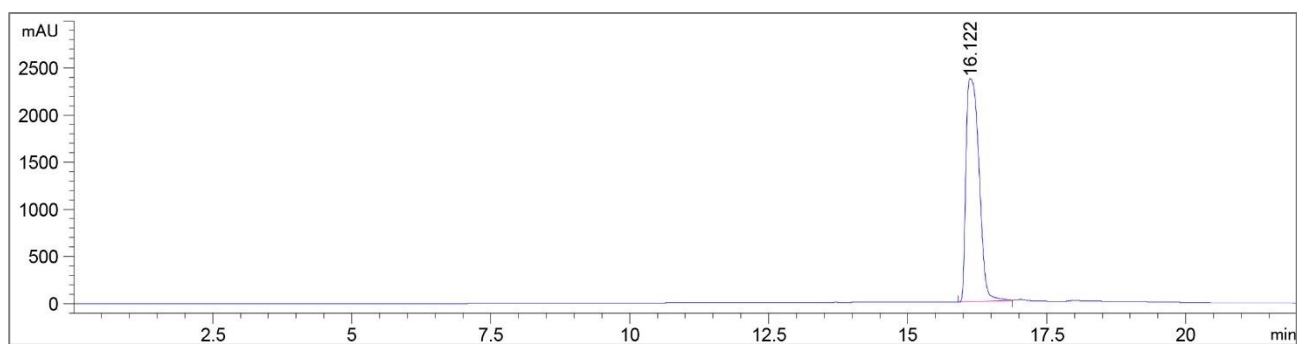

**Figure S82.** Chromatogram of *N*-Fmoc-Leu-OH.

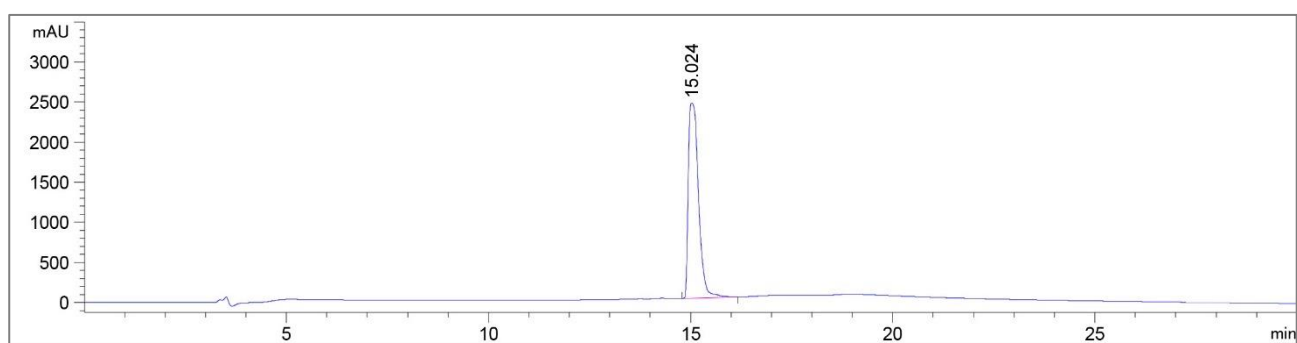

**Figure S83.** Chromatogram of *N*-Fmoc-Phe-OH.

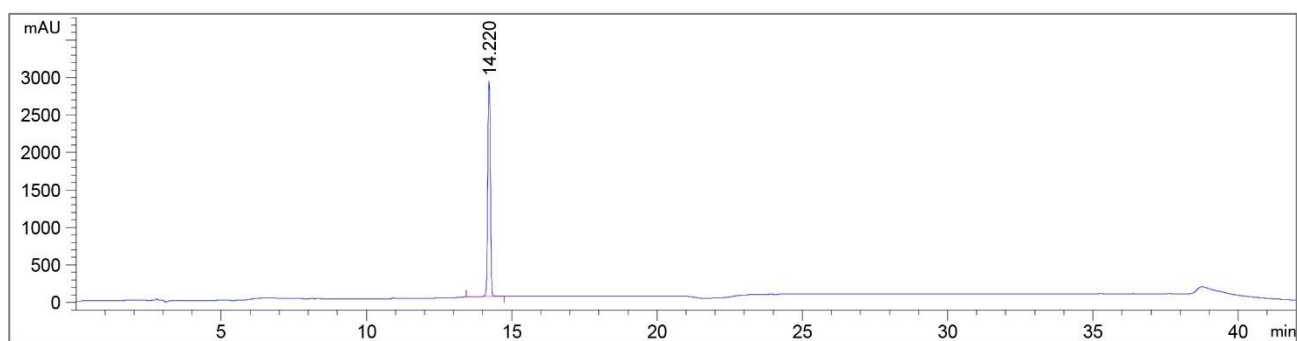

**Figure S84.** Chromatogram of *N*-Fmoc-Ser(tBu)-OH.

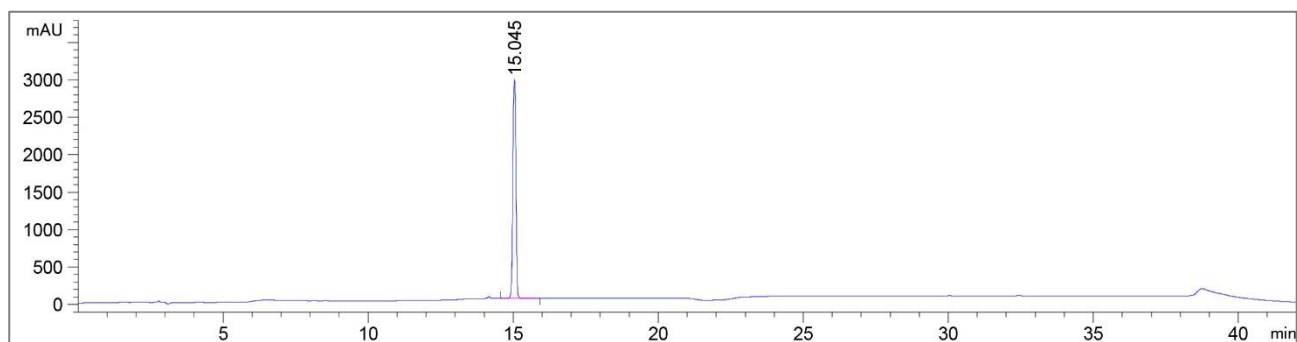

**Figure S85.** Chromatogram of *N*-Fmoc-Thr(tBu)-OH.

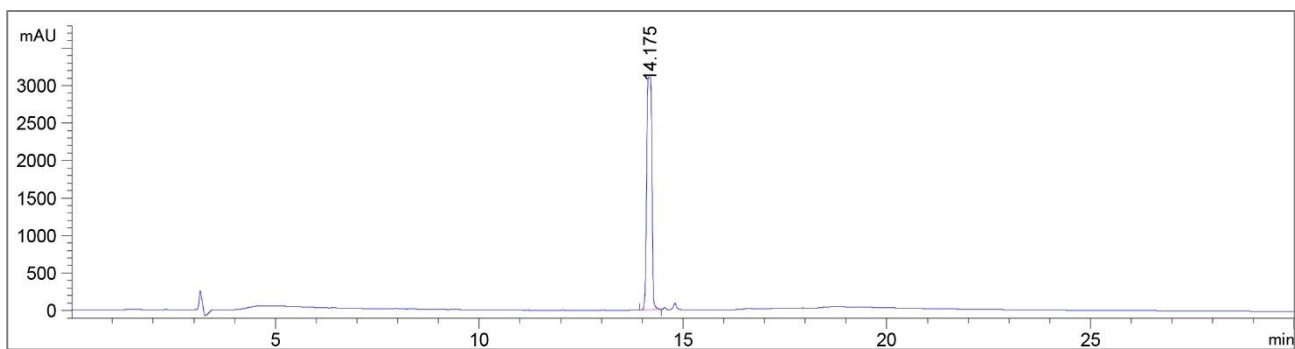

Figure S86. Chromatogram of *N*-Fmoc-Trp-OH.

## 8. NMR spectra

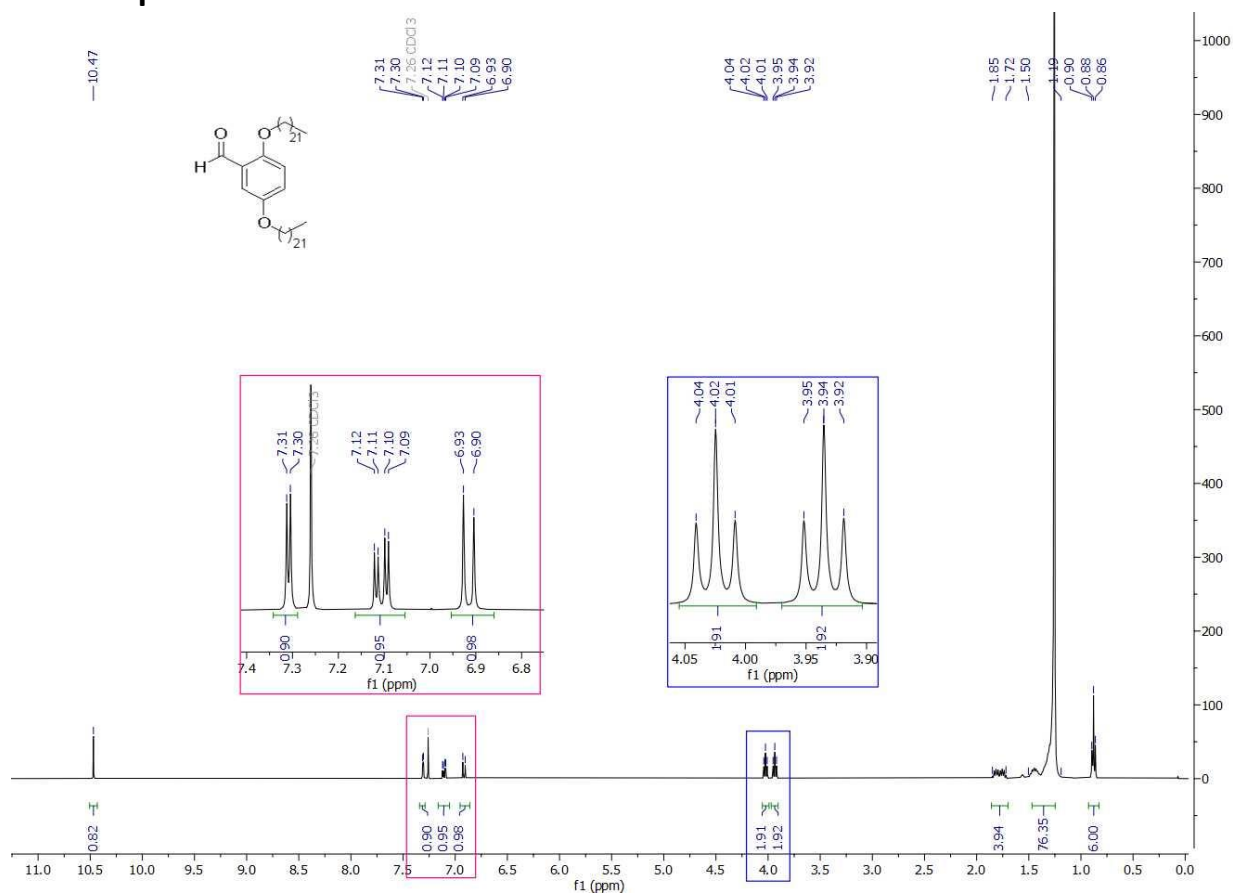

Figure S87. <sup>1</sup>H-NMR (400 MHz, CDCl<sub>3</sub>) spectra of 2,5-di(dococyoxy)benzaldehyde.

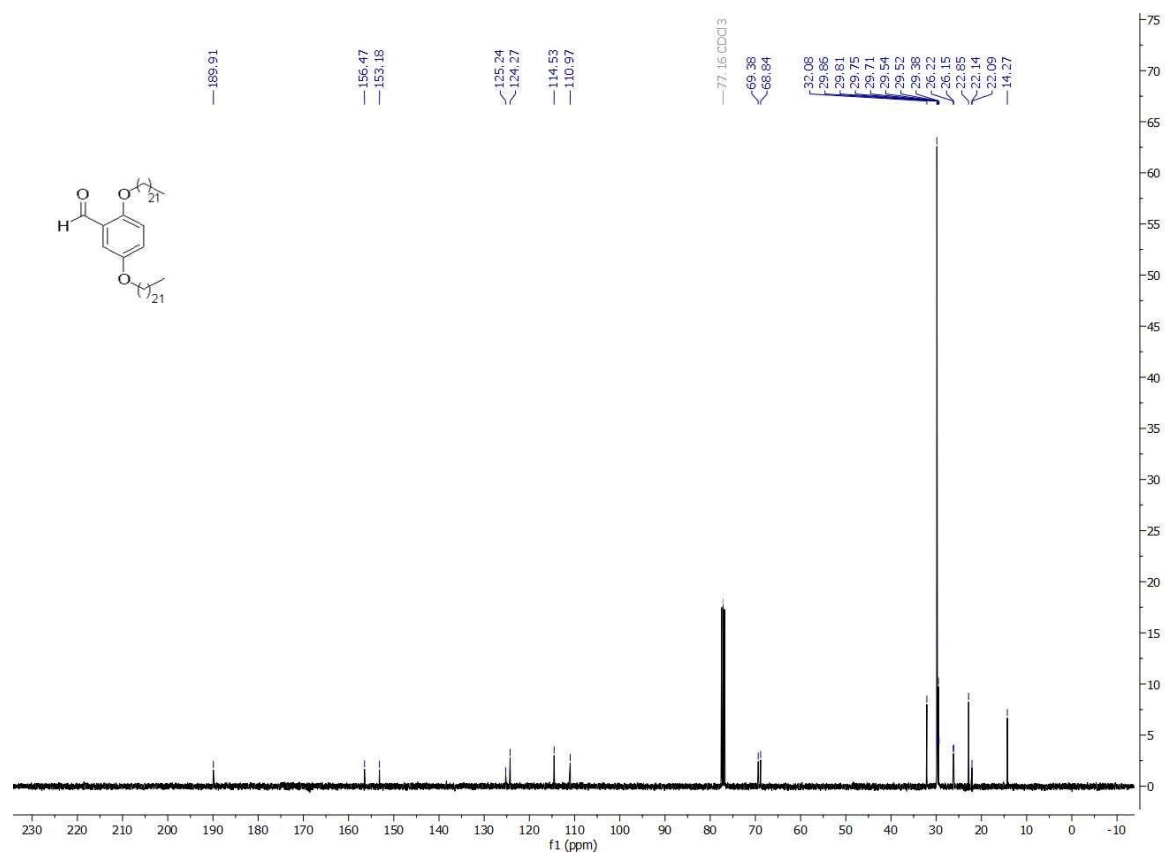

Figure S88. <sup>13</sup>C-NMR (100 MHz, CDCl<sub>3</sub>) spectra of 2,5-di(dococyloxy)benzaldehyde.

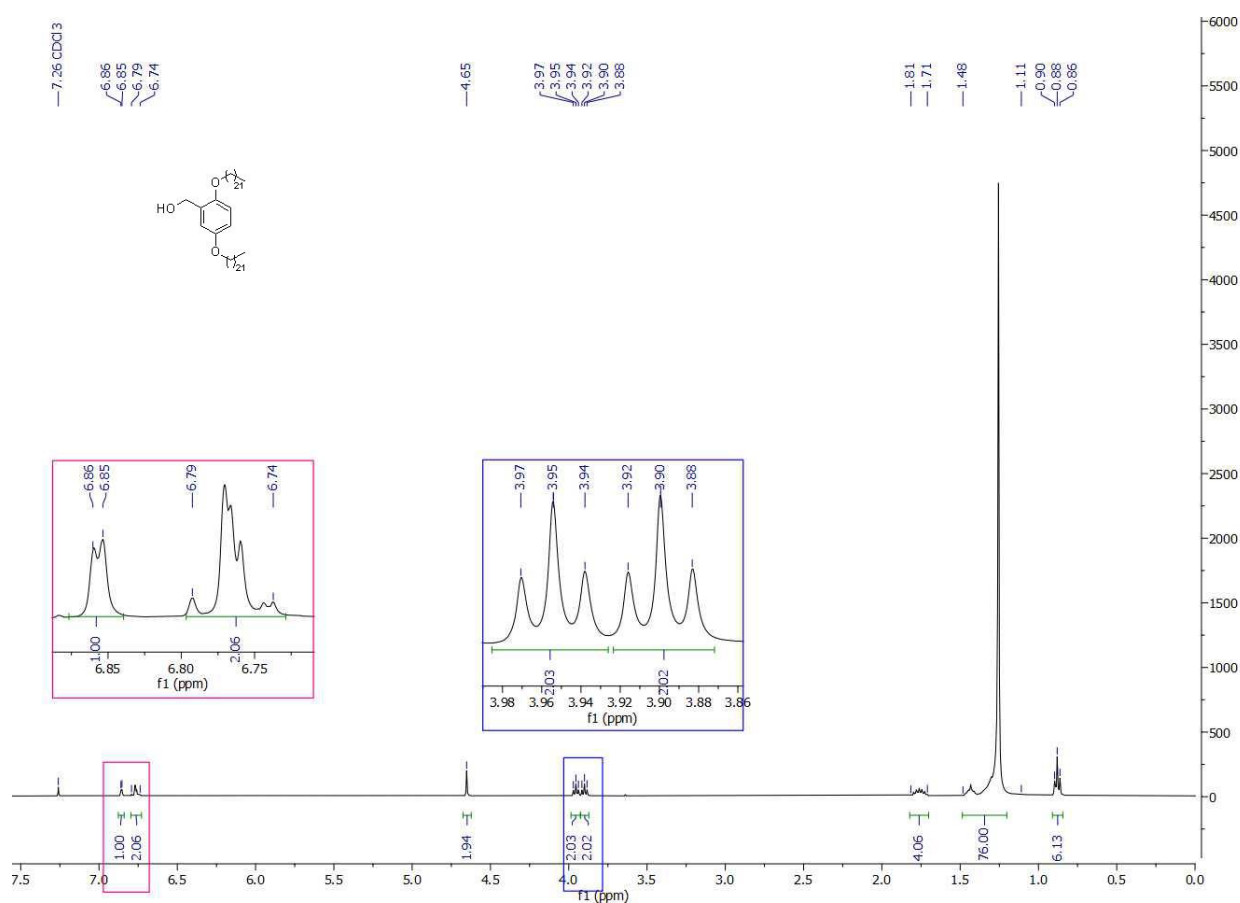

Figure S89. <sup>1</sup>H-NMR (400 MHz, CDCl<sub>3</sub>) spectra of (2,5-bis(dococyloxy)phenyl)methanol.

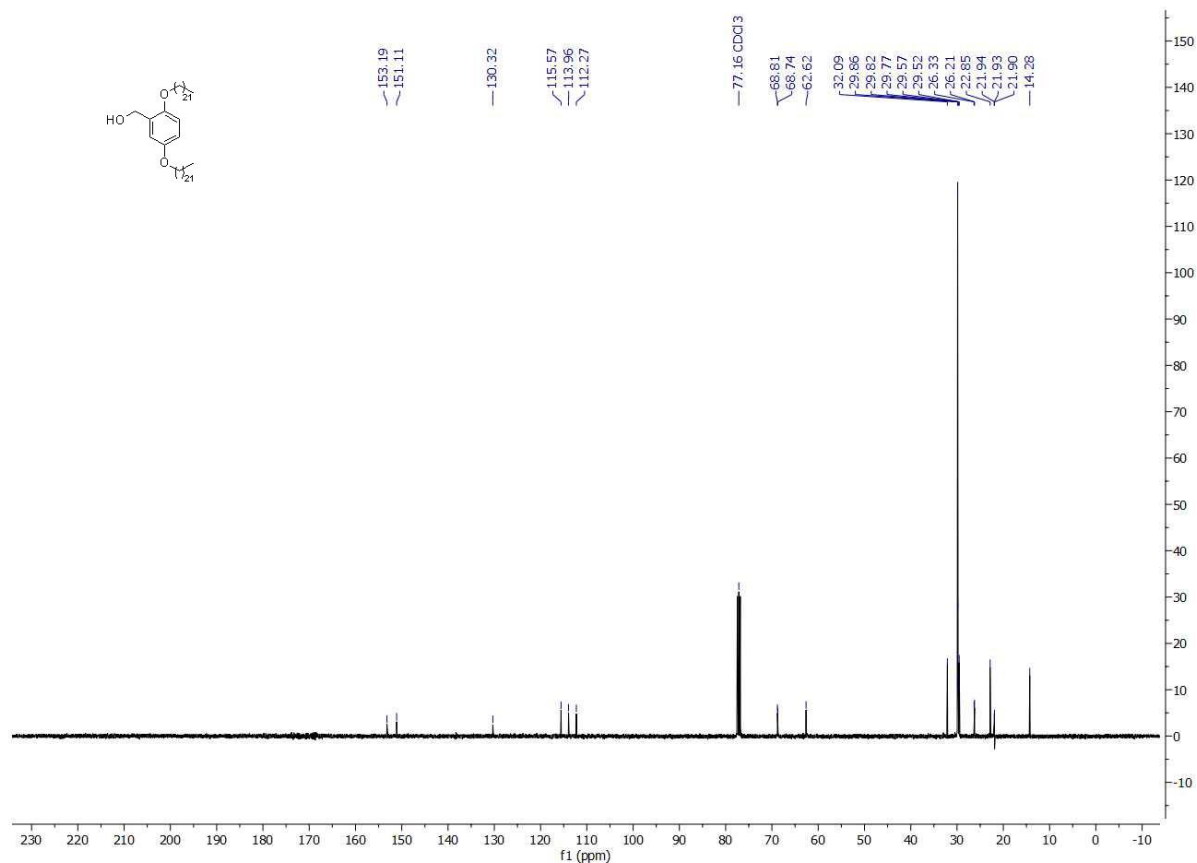

Figure S90. <sup>13</sup>C-NMR (100 MHz, CDCl<sub>3</sub>) spectra of (2,5-bis(docosyloxy)phenyl)methanol.

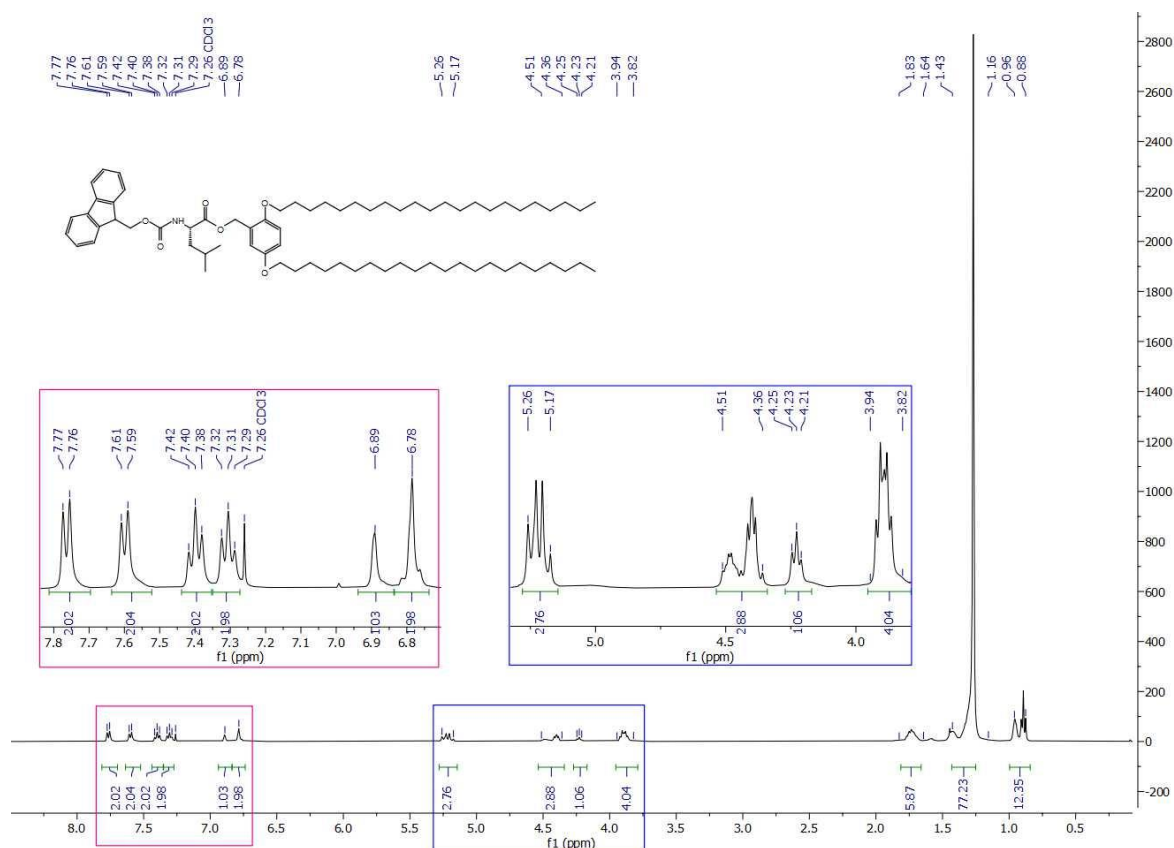

Figure S91. <sup>1</sup>H-NMR (400 MHz, CDCl<sub>3</sub>) spectra of N-Fmoc-Leu-Tag.

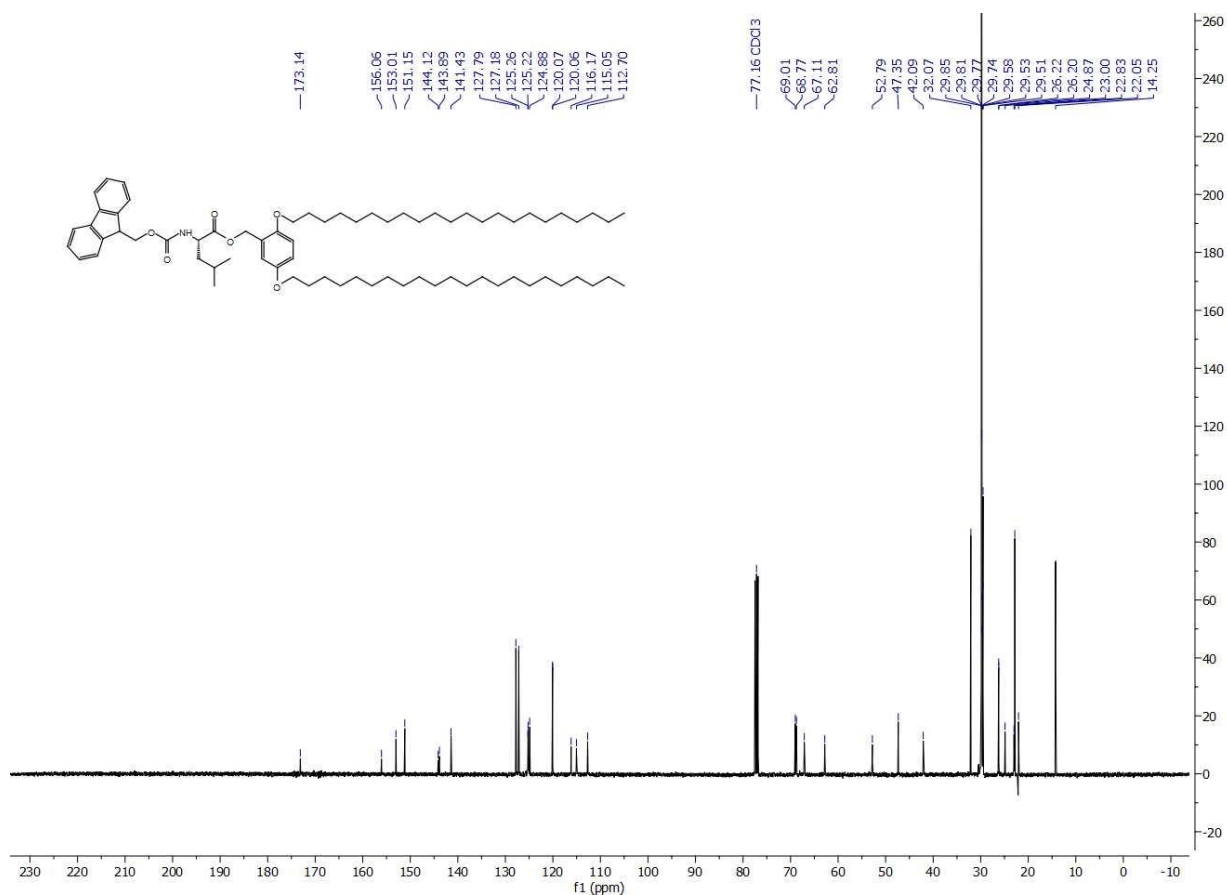

Figure S92.  $^{13}\text{C}$ -NMR (100 MHz,  $\text{CDCl}_3$ ) spectra of *N*-Fmoc-Leu-Tag.

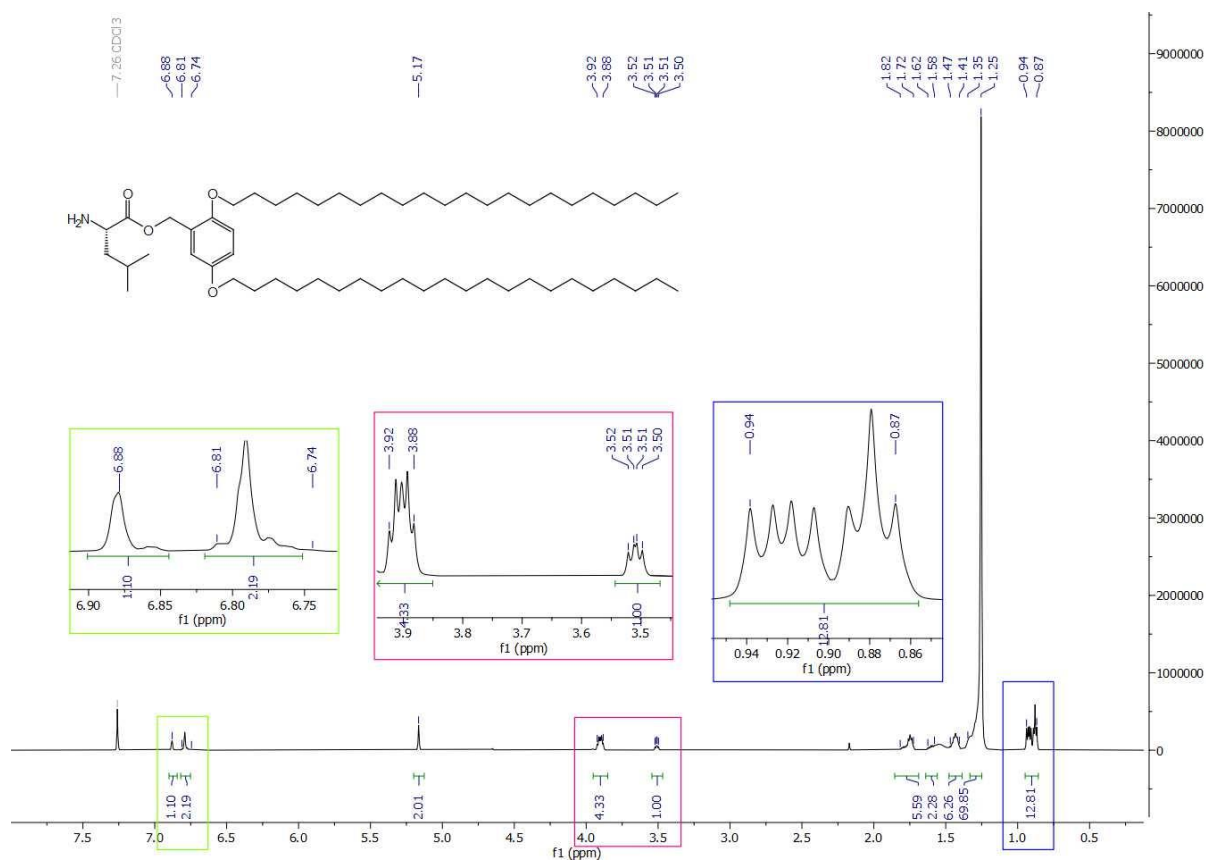

Figure S93.  $^1\text{H}$ -NMR (600 MHz,  $\text{CDCl}_3$ ) spectra of  $\text{H}_2\text{N}$ -Leu-Tag.

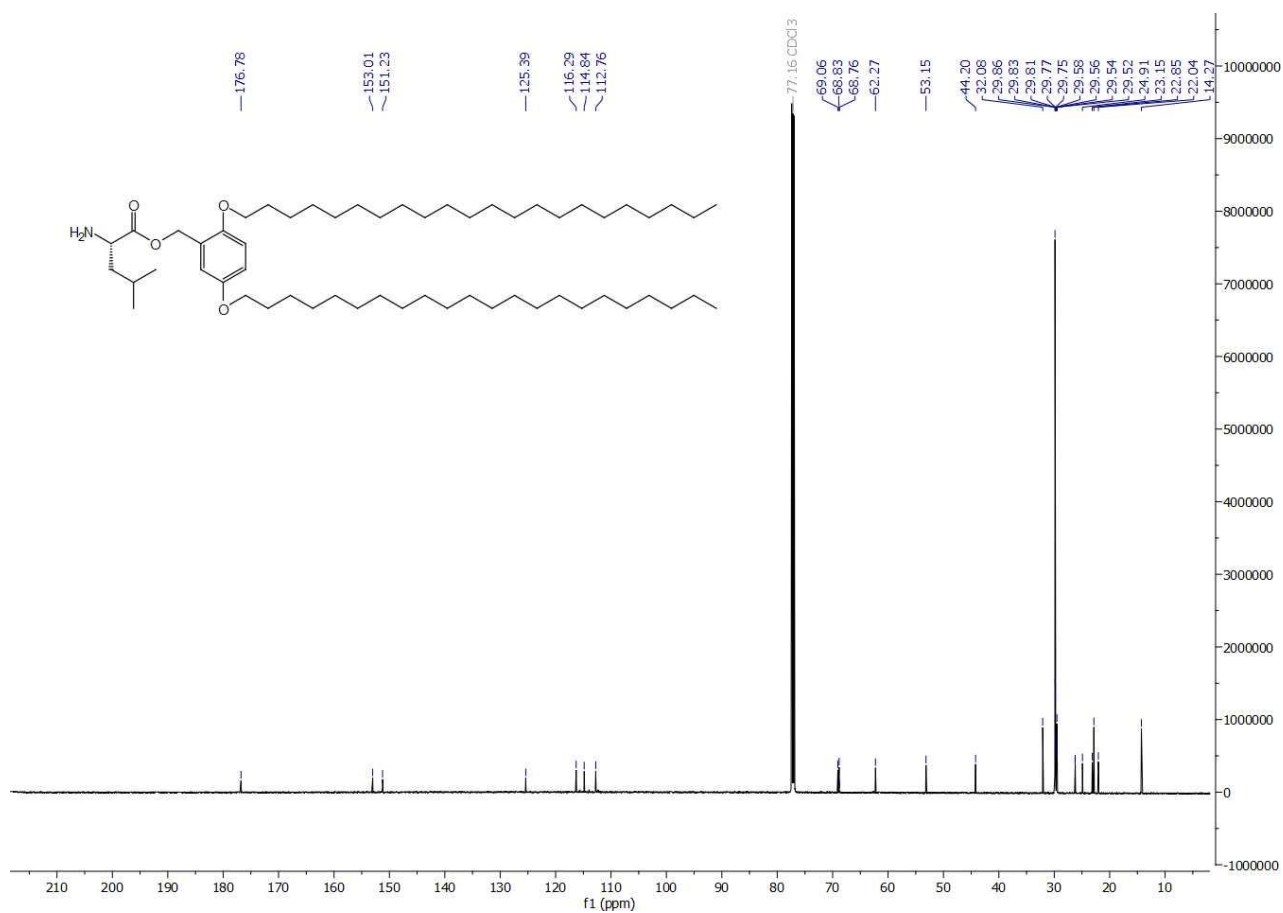

Figure S94.  $^{13}\text{C}$ -NMR (150 MHz,  $\text{CDCl}_3$ ) spectra of  $\text{H}_2\text{N-Leu-Tag}$ .

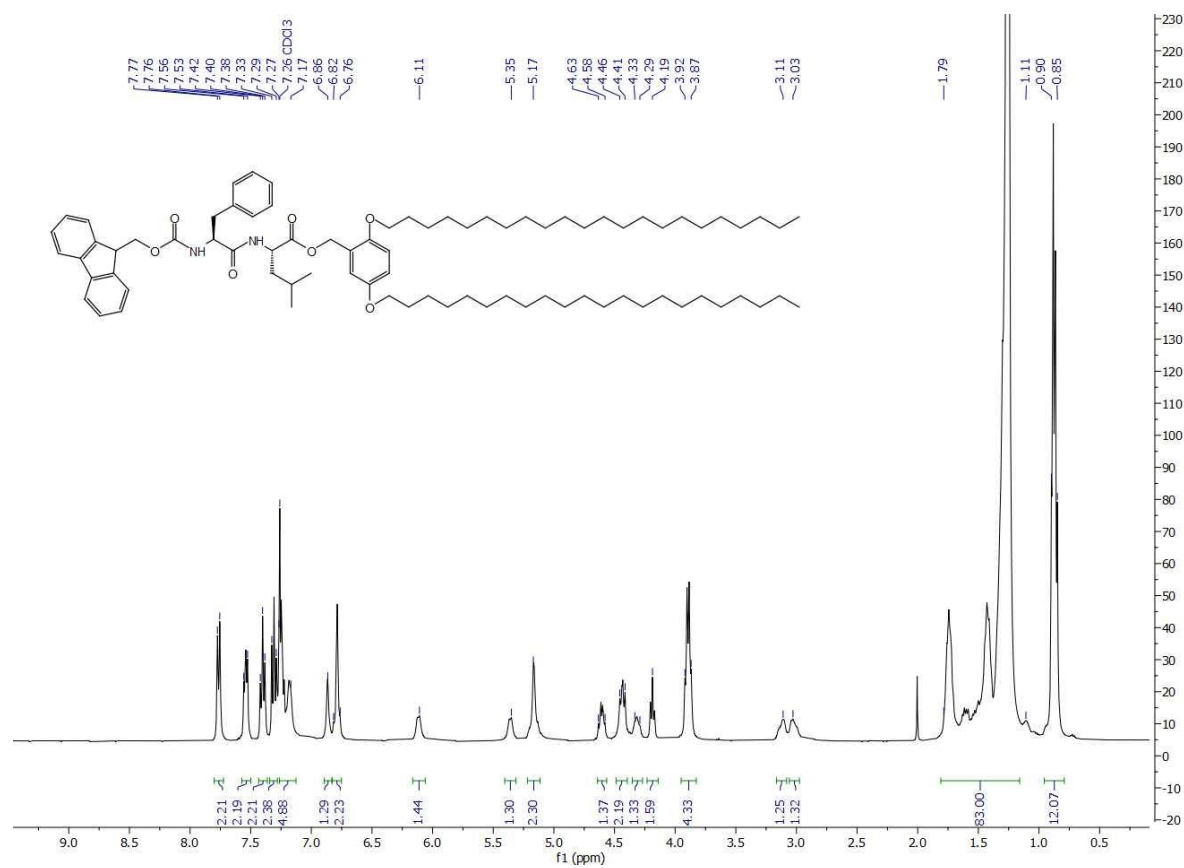

Figure S95.  $^1\text{H}$ -NMR (400 MHz,  $\text{CDCl}_3$ ) spectra of  $\text{N-Fmoc-Phe-Leu-Tag}$ .

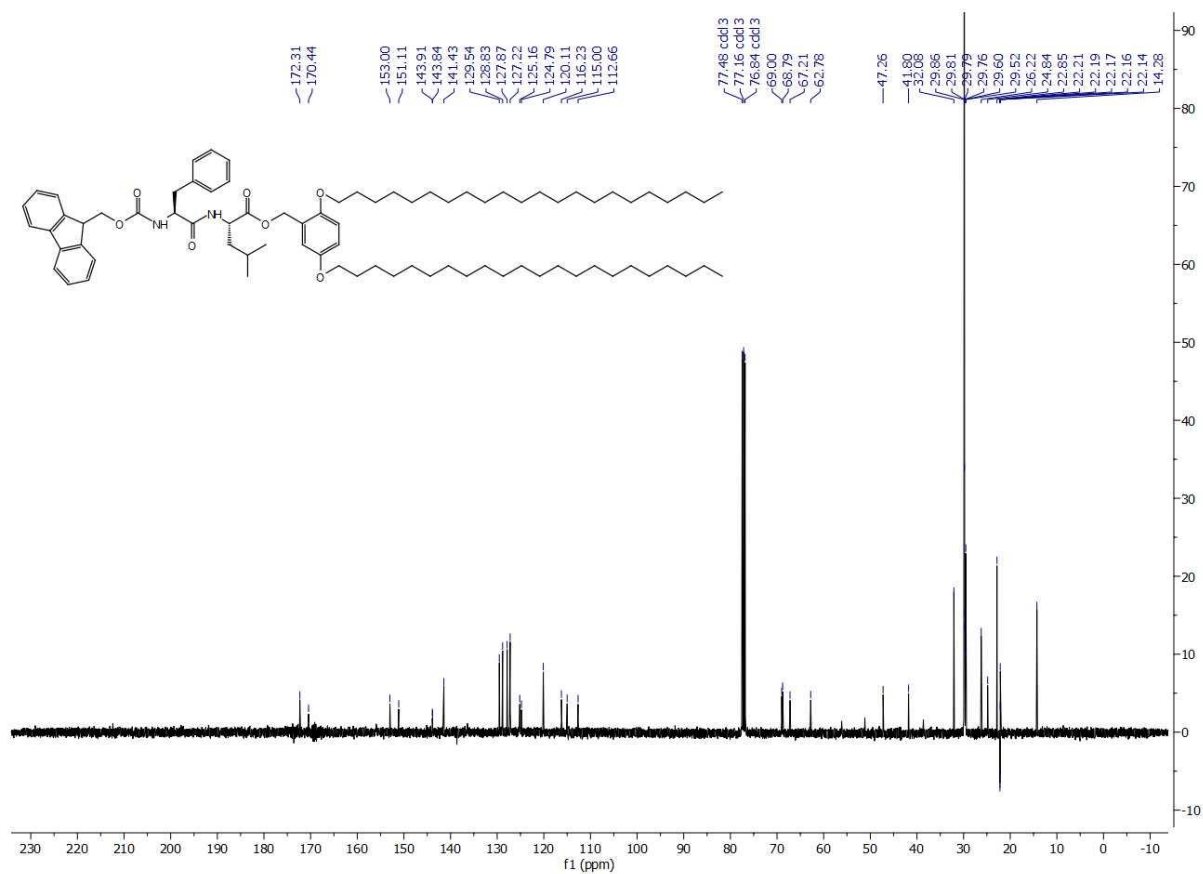

Figure S96.  $^{13}\text{C}$ -NMR (100 MHz,  $\text{CDCl}_3$ ) spectra of *N*-Fmoc-Phe-Leu-Tag.

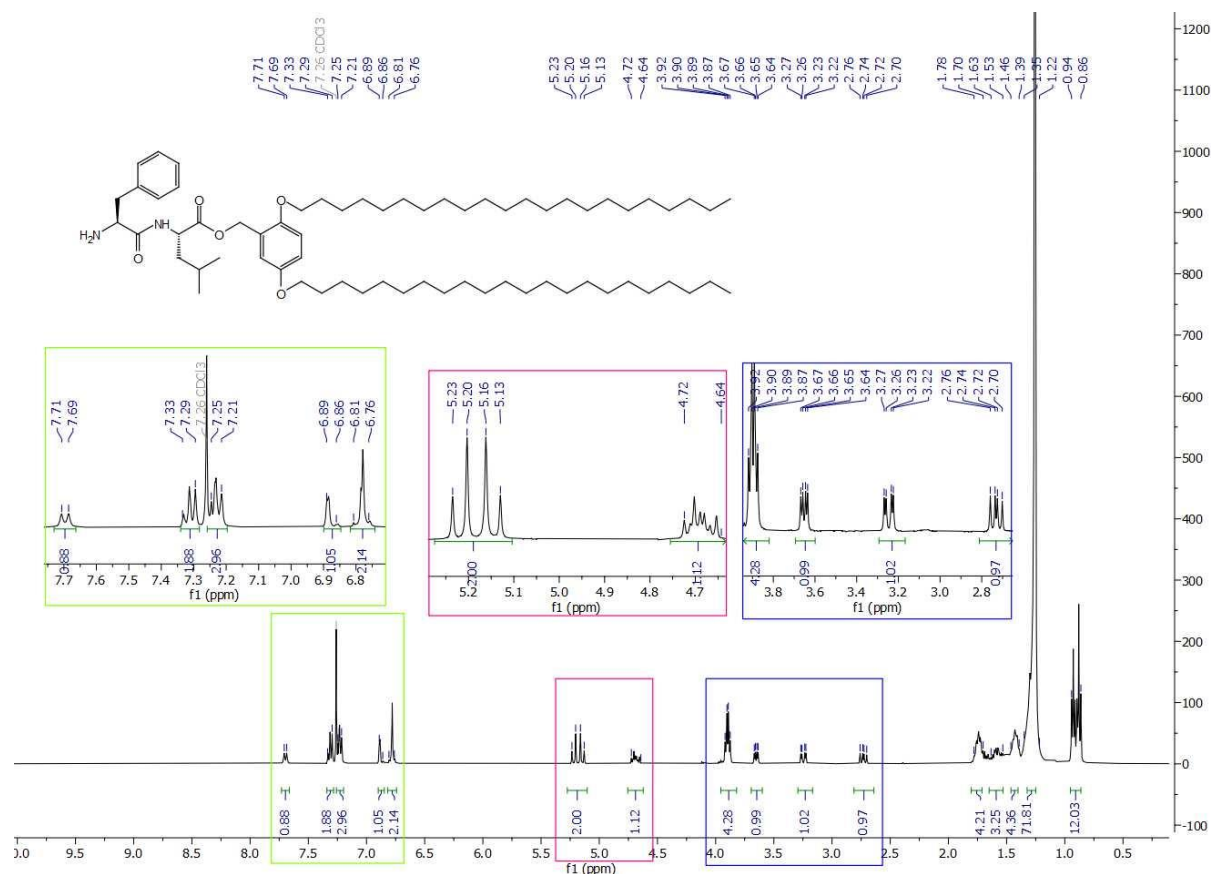

Figure S97.  $^1\text{H}$ -NMR (600 MHz,  $\text{CDCl}_3$ ) spectra of  $\text{H}_2\text{N}$ -Phe-Leu-Tag.

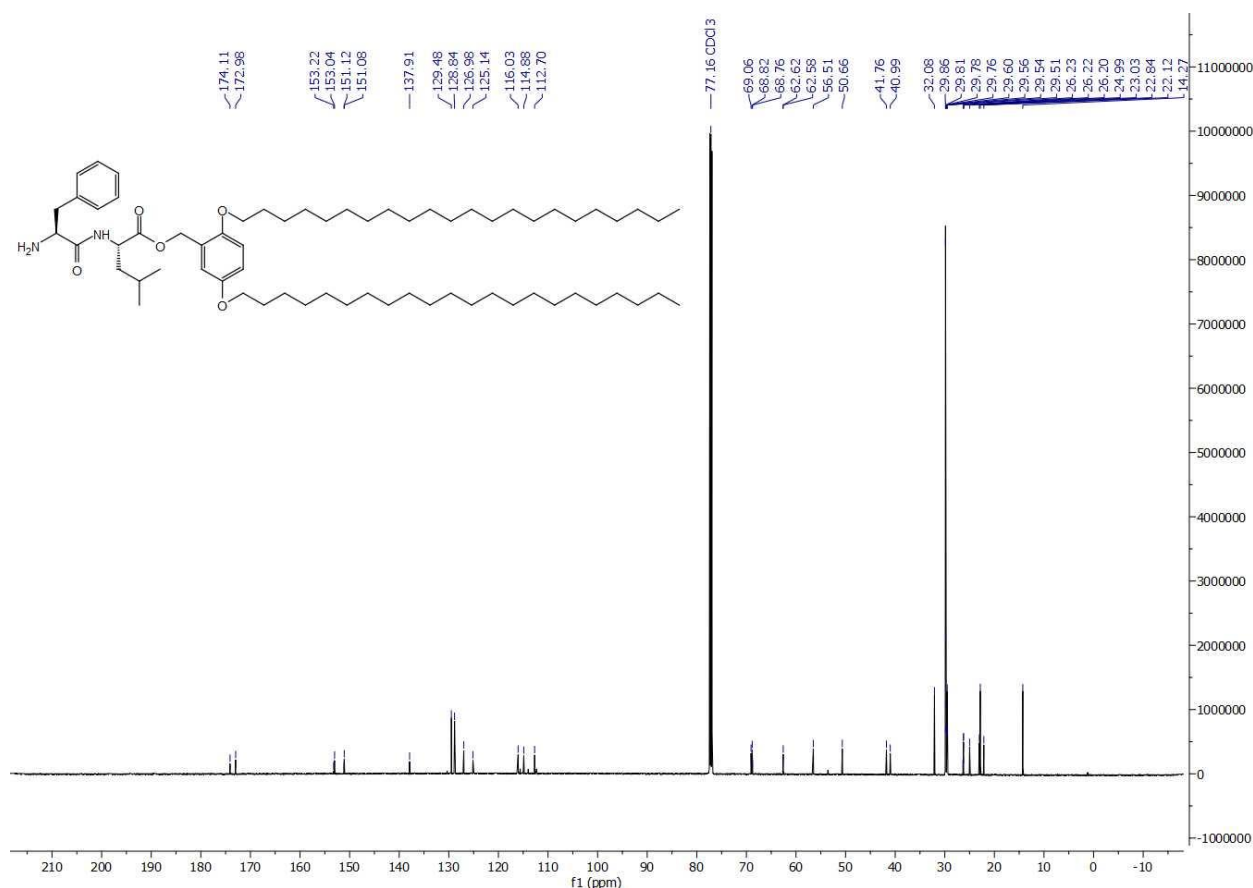

Figure S98.  $^{13}\text{C}$ -NMR (150 MHz,  $\text{CDCl}_3$ ) spectra of  $\text{H}_2\text{N-Phe-Leu-Tag}$ .

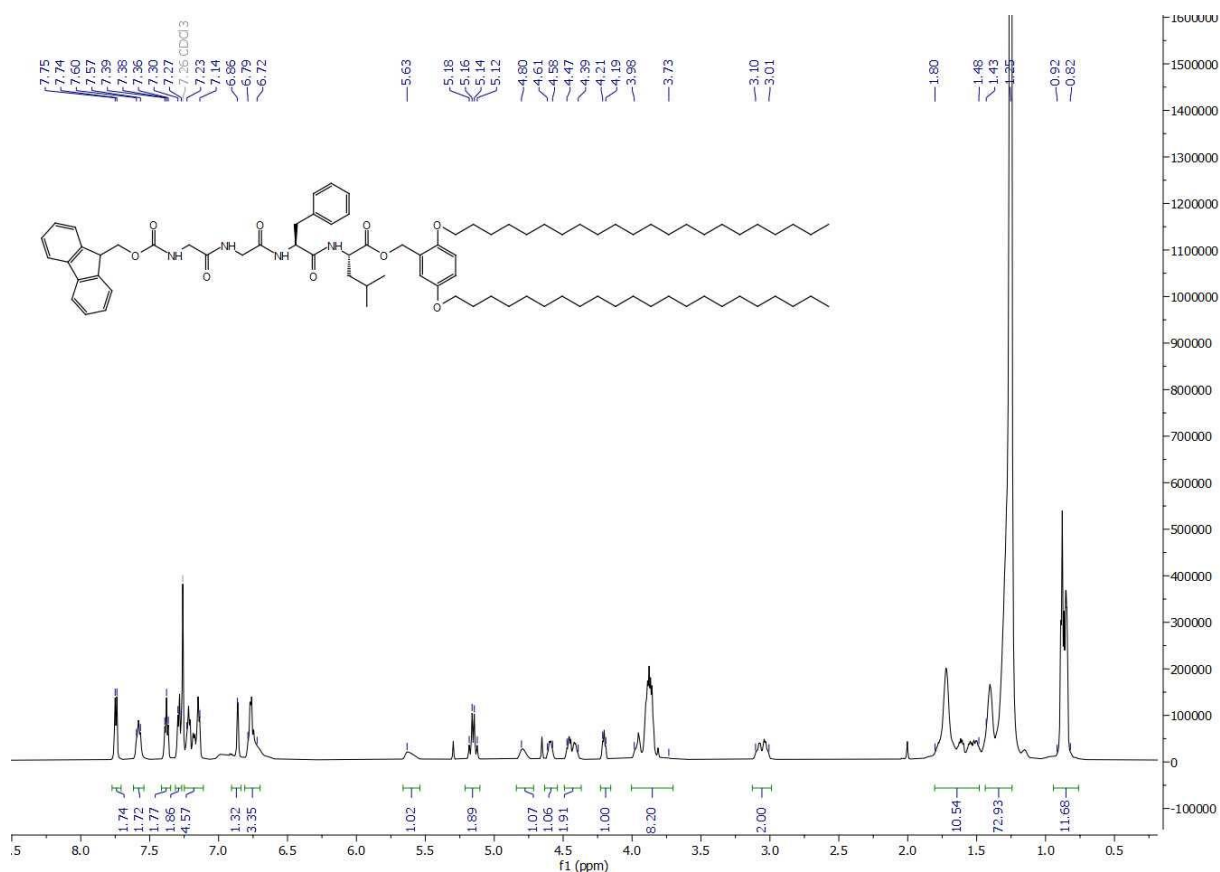

Figure S99.  $^1\text{H}$ -NMR (600 MHz,  $\text{CDCl}_3$ ) spectra of  $\text{N-Fmoc-Gly-Gly-Phe-Leu-Tag}$ .

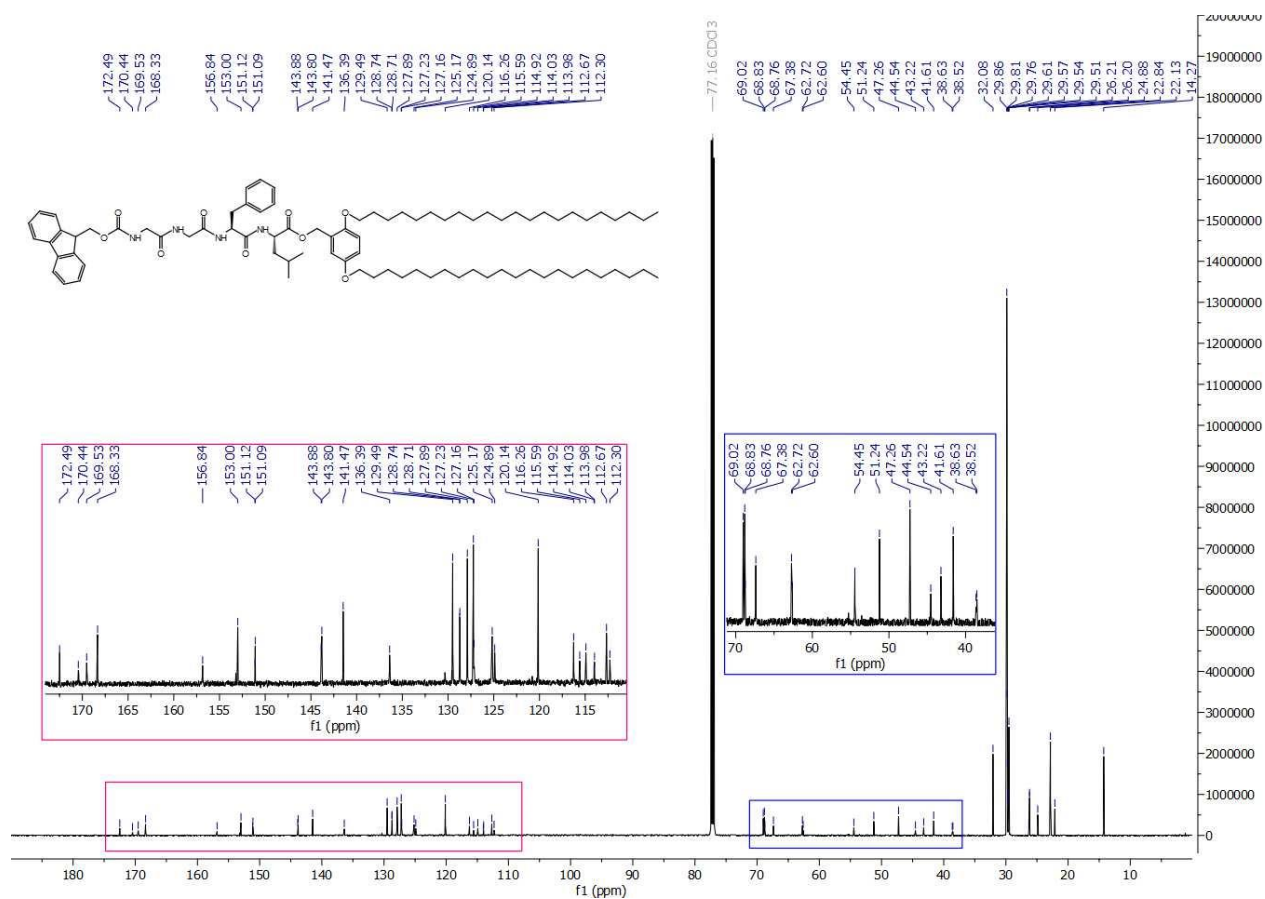

**Figure S100.** <sup>13</sup>C-NMR (150 MHz, CDCl<sub>3</sub>) spectra of *N*-Fmoc-Gly-Gly-Phe-Leu-Tag.

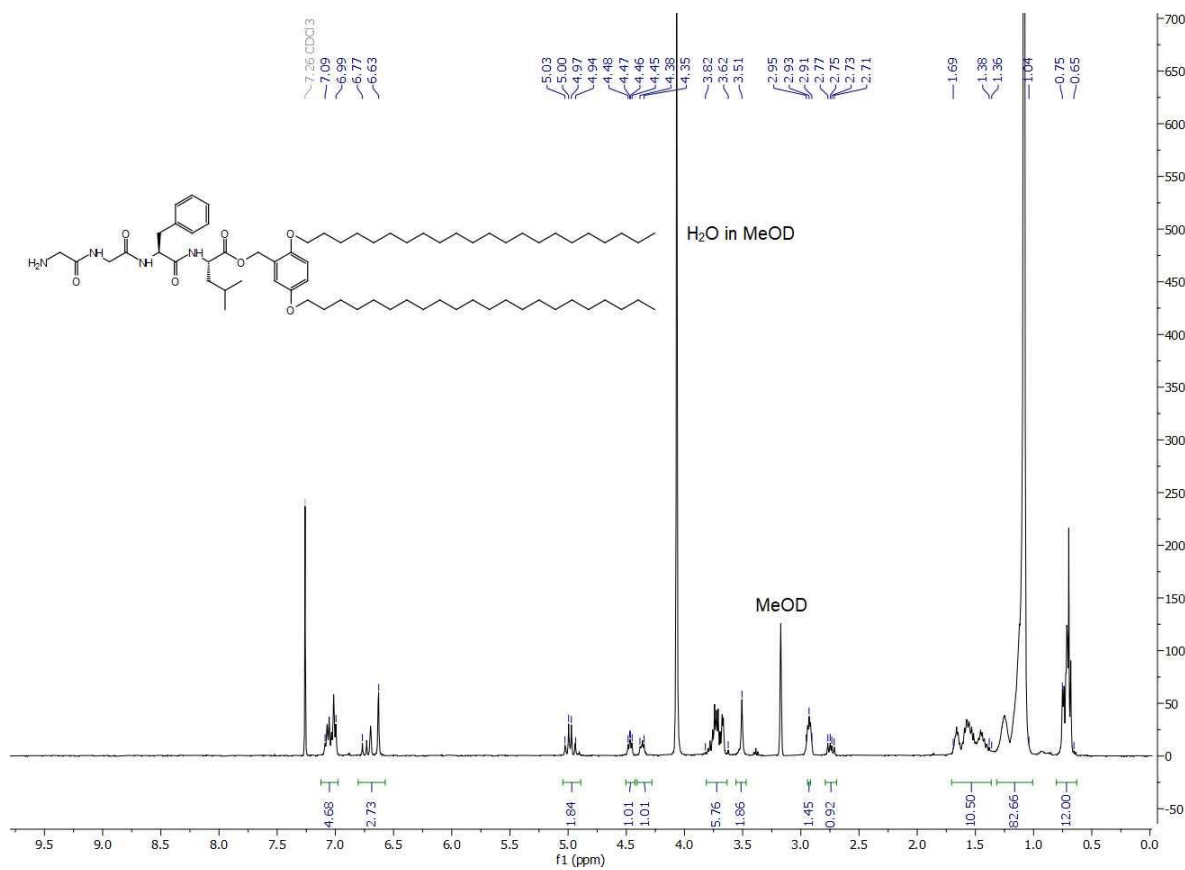

**Figure S101.** <sup>1</sup>H-NMR (600 MHz, 20%MeOD in CDCl<sub>3</sub>) spectra of H<sub>2</sub>N-Gly-Gly-Phe-Leu-Tag.

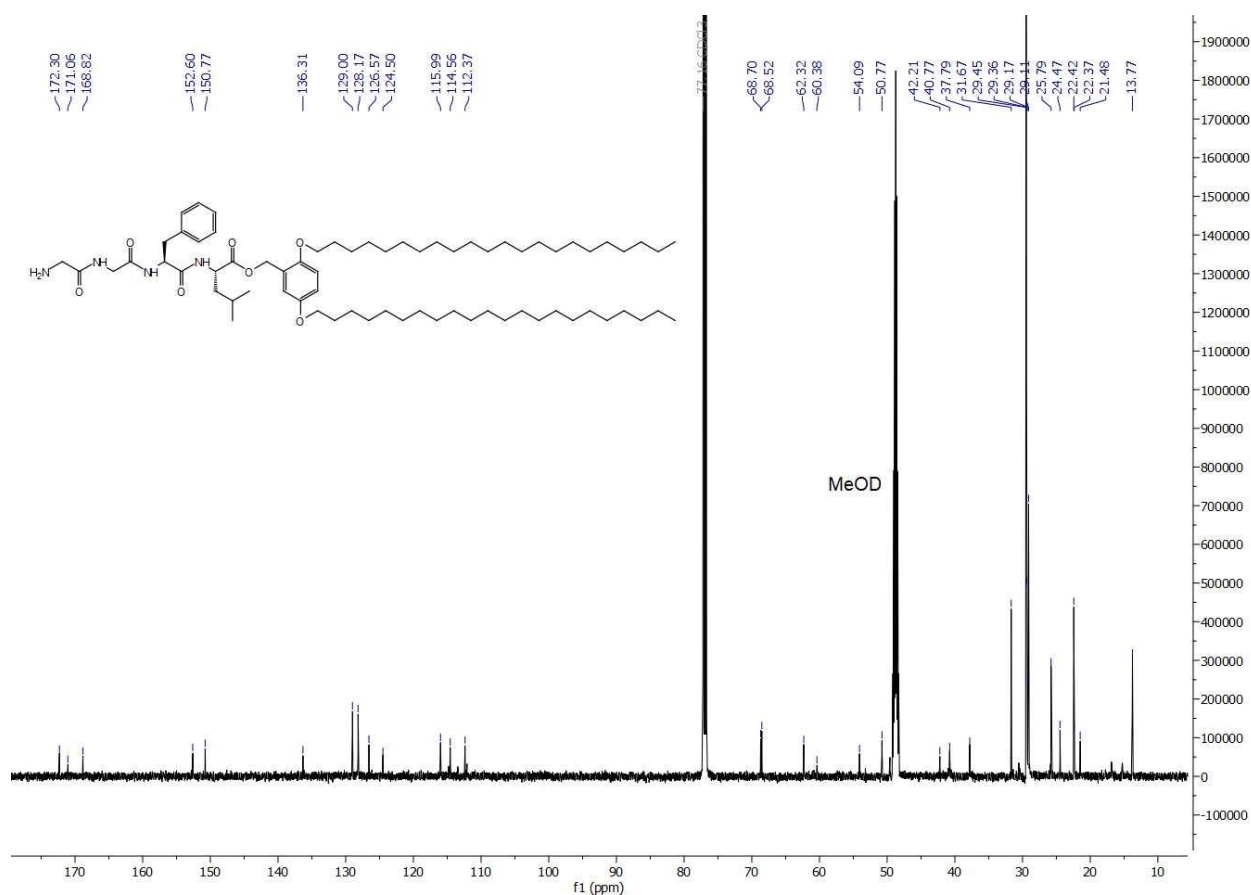

Figure S102.  $^{13}\text{C}$ -NMR (150 MHz, 20%MeOD in  $\text{CDCl}_3$ ) spectra of  $\text{H}_2\text{N-Gly-Gly-Phe-Leu-Tag}$ .

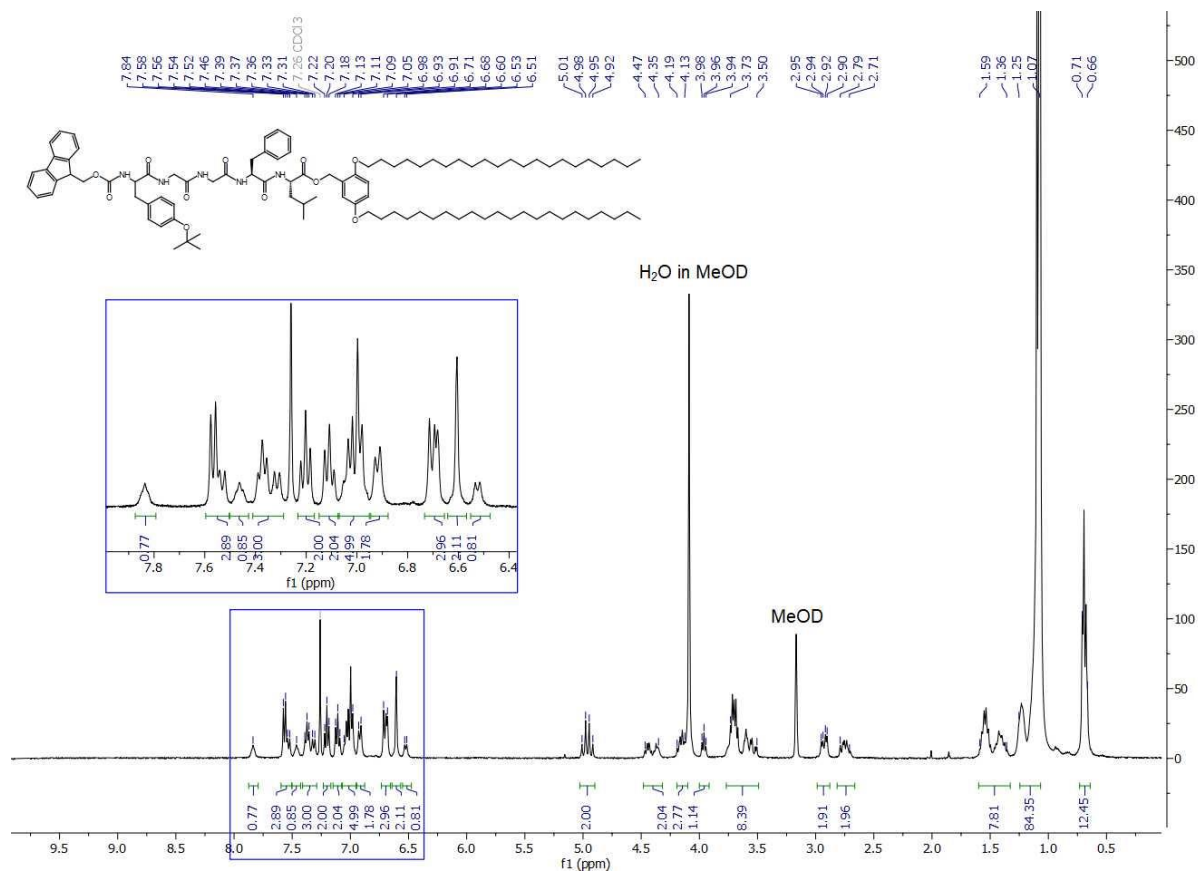

Figure S103.  $^1\text{H}$ -NMR (400 MHz, 20%MeOD in  $\text{CDCl}_3$ ) spectra of  $\text{N-Fmoc-Tyr(tBu)-Gly-Gly-Phe-Leu-Tag}$ .

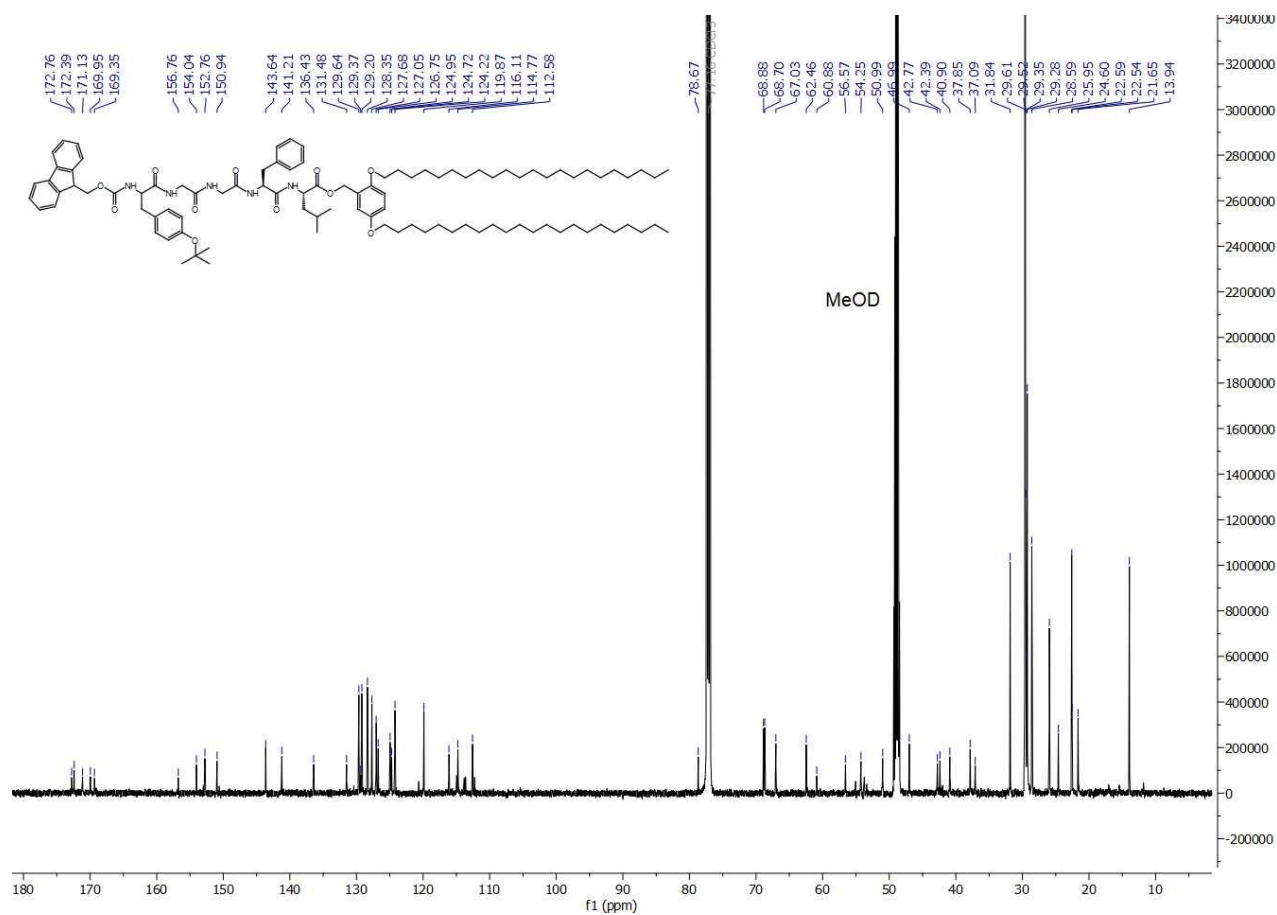

Figure S104.  $^{13}\text{C}$ -NMR (150 MHz, 20%MeOD in  $\text{CDCl}_3$ ) spectra of *N*-Fmoc-Tyr(tBu)-Gly-Gly-Phe-Leu-Tag.

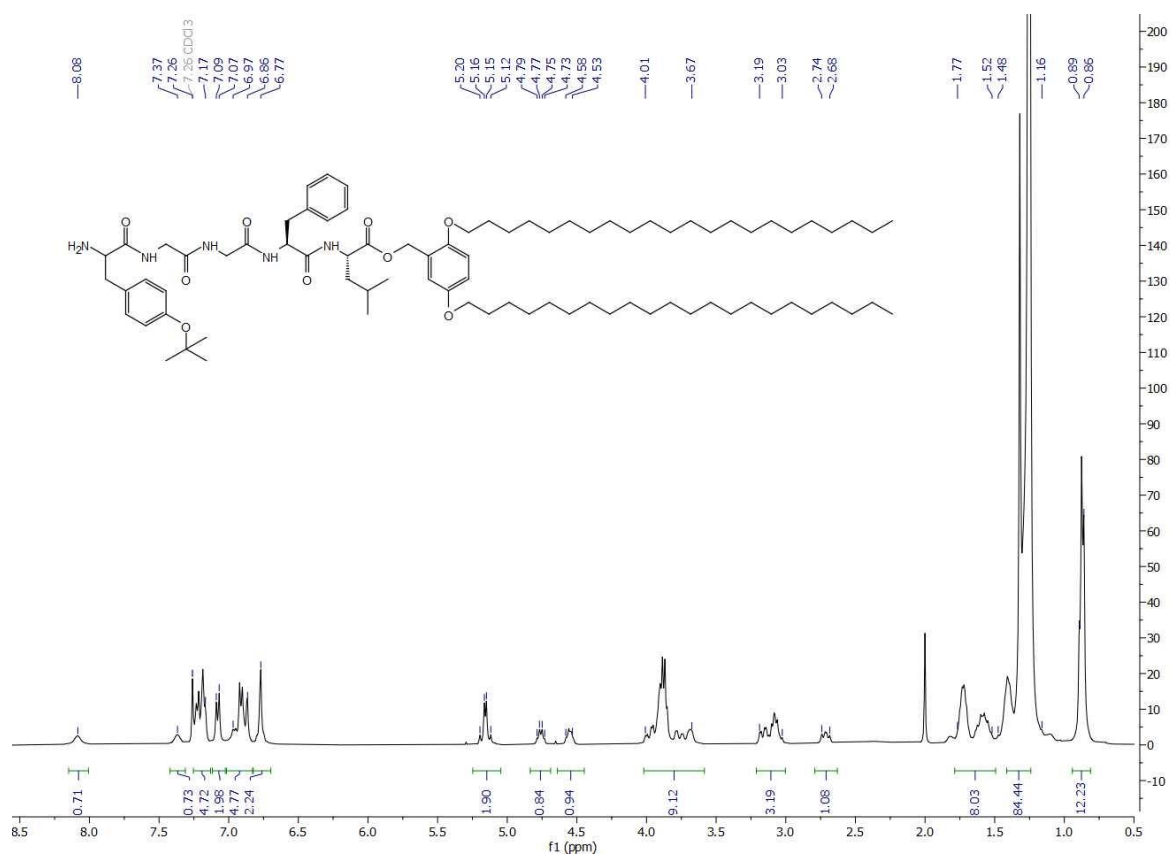

Figure S105.  $^1\text{H}$ -NMR (400 MHz,  $\text{CDCl}_3$ ) spectra of  $\text{H}_2\text{N}$ -Tyr(tBu)-Gly-Gly-Phe-Leu-Tag.

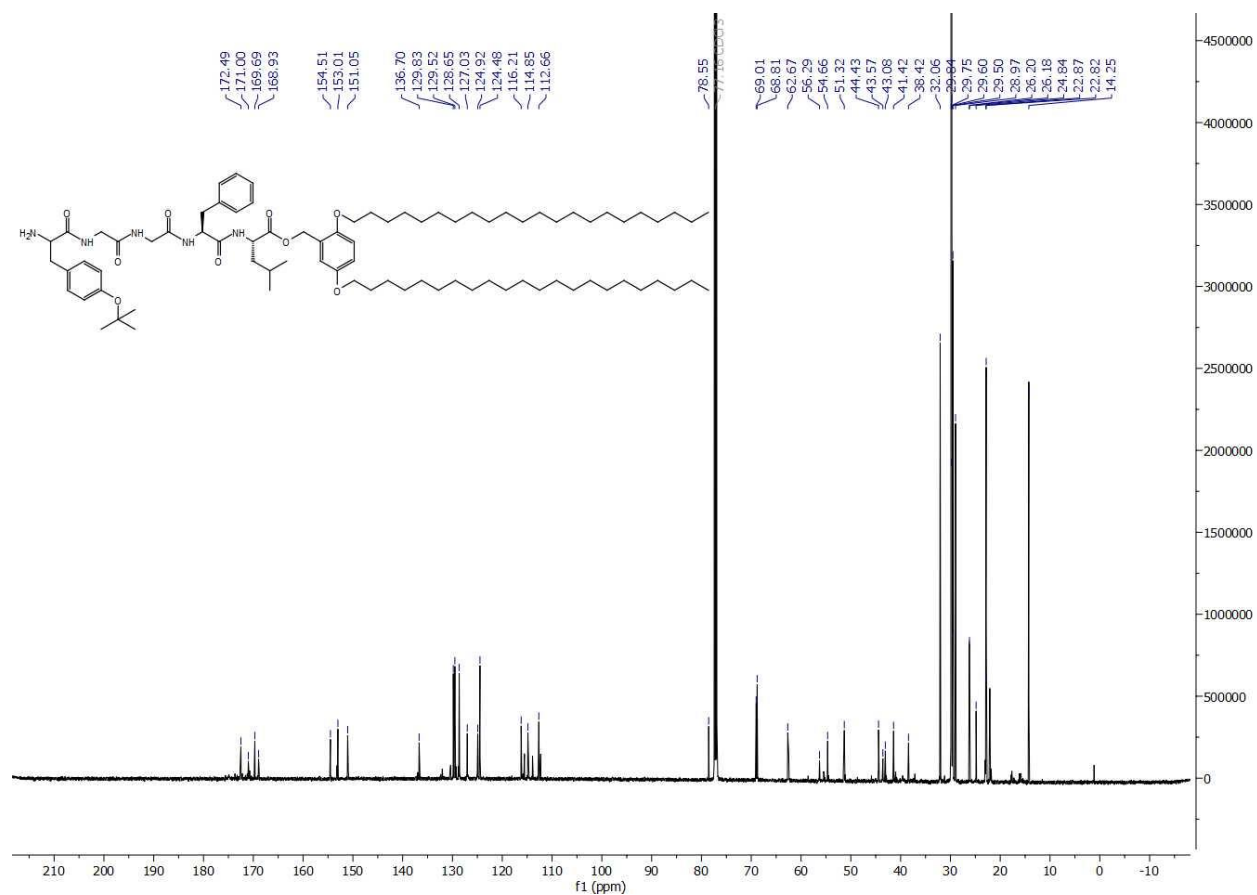

**Figure S106.**  $^{13}\text{C}$ -NMR (150 MHz,  $\text{CDCl}_3$ ) spectra of  $\text{H}_2\text{N-Tyr(tBu)-Gly-Gly-Phe-Leu-Tag}$ .
